# Supplementary material for: Dual-state emission of pyrazolyl-pyrrolo[3,4-b]pyridin-5-ones via excited-state intramolecular proton transfer (ESIPT): multicomponent synthesis and optical characterization
Source: Royal Society of Chemistry journal article supplement (doi:10.1039/d4qo02256d), 2025-01-01
Supplement: d4qo02256d1.pdf [file d4qo02256d1.pdf]

## Supporting Information

### Dual-State Emission of Pyrazolyl-Pyrrolo[3,4-*b*]pyridin-5-ones via Excited-State Intramolecular Proton Transfer (ESIPT): Multicomponent Synthesis and Optical Characterization

Julio C. Flores-Reyes,<sup>a‡</sup> Yoarhy A. Amador-Sánchez,<sup>a‡</sup> Alejandro Valderrama-Celestino,<sup>a</sup> Bertha Daniela Barrios-Campos,<sup>a</sup> Ricardo A. Peralta,<sup>a</sup> Michael T. Huxley,<sup>b</sup> Ilich A. Ibarra,<sup>c</sup> Alejandro Islas-Jácome,<sup>a</sup> Diego Solis-Ibarra,<sup>c\*</sup> and Eduardo González-Zamora<sup>a\*</sup>

*a) Departamento de Química, Universidad Autónoma Metropolitana-Iztapalapa, Av. Ferrocarril San Rafael Atlixco 186, Col. Leyes de Reforma 1A Sección, Iztapalapa, 09310, Ciudad de México, México.*

*b) School of Physics, Chemistry and Earth Sciences, Faculty of Sciences, Engineering and Technology, The University of Adelaide, Adelaide, SA, 5005, Australia.*

*c) Laboratorio de Físicoquímica y Reactividad de Superficies, (LaFReS), Instituto de Investigaciones en Materiales, Universidad Nacional Autónoma de México, Circuito Exterior S/N, CU, Coyoacán, Ciudad de México, México.*

‡ These authors contributed equally to this work

|                                                                                                        |         |
|--------------------------------------------------------------------------------------------------------|---------|
| General remarks                                                                                        | S2      |
| Synthesis of 3-(2-(methoxymethoxy)phenyl)-1-phenyl-1 <i>H</i> -pyrazole-4-carbaldehyde <b>1</b>        | S3      |
| Synthesis of 2-isocyano-1-morpholino-3-phenylpropan-1-one <b>3</b>                                     | S3      |
| Synthesis of pyrazolyl-pyrrolo[3,4- <i>b</i> ]pyridin-5-ones <b>6a-f</b>                               | S6-S10  |
| NMR spectra of all synthesized compounds                                                               | S11-S53 |
| HRMS spectra of MOM-protected <b>1</b> and pyrazolyl-pyrrolo[3,4- <i>b</i> ]pyridin-5-ones <b>6a-f</b> | S54-S57 |
| Data of DFT and TD-DFT calculations                                                                    | S58-S67 |
| Single-crystal X-ray Diffraction Data                                                                  | S68-S72 |
| References                                                                                             | S73     |

## General remarks

All reagents and solvents were obtained from Sigma-Aldrich-Merck and used as received, without further purification, distillation, or drying. Solvents were dried following standard procedures.  $^1\text{H}$ ,  $^{11}\text{B}$ ,  $^{13}\text{C}$ , and  $^{19}\text{F}$  Nuclear Magnetic Resonance (NMR) spectra were acquired on a Bruker AMX Advance III spectrometer (500 MHz, Fällande, Uster, Switzerland) using chloroform ( $\text{CDCl}_3$ ) as solvent. Chemical shifts ( $\delta$ ) are reported in parts per million (ppm) relative to  $\text{Si}(\text{CH}_3)_4$ . Coupling constants ( $J$ ) are reported in hertz (Hz). Peak multiplicity is indicated as follows: s = singlet, d = doublet, t = triplet, m = multiplet, bs = broad signal for proton spectra. The spectra were processed using MestReNova software, version 12.0.0-20080 (A Coruña, Spain). **FT-IR spectra** were recorded on an Agilent Cary 630 FT-IR instrument. **High-Resolution Mass Spectrometry** (HRMS) data were acquired by electrospray ionization (ESI) using a Micro-TOF II mass spectrometer (Bruker Daltonics GmbH, Bremen, Germany). The sample was injected directly through an Apollo source and analyzed using the time-of-flight (TOF) method. HRMS spectra were analyzed with Compass software (version 1.5, Bruker Daltonik GmbH, Bremen, Germany). **Microwave-assisted reactions** were carried out in a closed-vessel mode using a CEM Discover SP MW reactor (Matthews, North Carolina, USA). **The reaction progress** was monitored by thin-layer chromatography (TLC), with spots visualized under ultraviolet (UV) light at 254 or 365 nm. **The purification of the final products** was performed using preparative glass plates (20 x 20 cm) coated with silica gel 60 containing a UV indicator (F254). **Chemical structures** were generated using ChemDraw software, version 15.0.0.106 Professional (Perkin Elmer Informatics, Cambridge, MA, USA). **Absorption spectra** were recorded in high performance liquid chromatography (HPLC) grade chloroform, acetonitrile and dimethylsulfoxide at 293 K on a Perkin Elmer Lambda 950 spectrophotometer. For the determination of the molar extinction coefficients ( $\epsilon$ ), absorption measurements at five different concentrations were carried out. **Emission spectra in solution** were recorded in HPLC grade chloroform, acetonitrile and dimethylsulfoxide at 293 K on a Perkin Elmer LS 55 Luminescence Spectrometer. **PL and PLQY measurements** were obtained in an Edinburgh Instruments FS5 fluorometer with a 150 W CW Ozone-free xenon arc lamp, and Czerny–Turner monochromators, using an SC-05 (standard cuvette), SC-10 (solid-state holder) and SC-30 (Integrating Sphere) modules, respectively. **Single-crystal X-ray diffraction data** were collected at 100 K on a Rigaku XtaLAB Synergy-s diffractometer equipped with a HyPix-6000HE detector. The structures were solved using SHELXT and refined by full-matrix least squares on  $F^2$  by SHELXL, interfaced through the program OLEX. All atoms were refined anisotropically and hydrogen atoms were included at geometrically estimated positions. Images were produced using the software Crystal Maker 2.3.

## Organic synthesis

### 3-(2-(Methoxymethoxy)phenyl)-1-phenyl-1*H*-pyrazole-4-carbaldehyde (**1**).

The pyrazole-derived aldehyde **1'** was synthesized following a previously reported method in two steps.<sup>i</sup> The first step involved an acetic acid-catalyzed condensation between phenylhydrazine **15** and 2'-hydroxyacetophenone **16**, yielding the corresponding hydrazone **17** in quantitative yield. The second step consisted of a double Vilsmeier-Haack formylation. In this step, the first equivalent of the Vilsmeier reagent reacts with the hydrazone to form a pyrazole ring, which is subsequently formylated by a second equivalent of the Vilsmeier reagent, affording the target compound **1'** with an overall yield of 38% (Scheme S1).

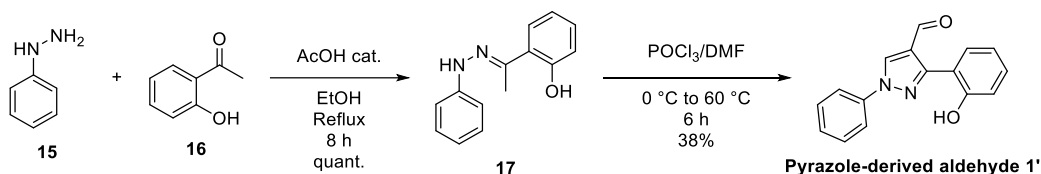

**Scheme S1.** Synthesis of 3-(2-hydroxyphenyl)-1-phenyl-1*H*-pyrazole-4-carbaldehyde **1'**.

The protection of the pyrazole-derived aldehyde was carried out following the procedure reported by DeShong and Seganish,<sup>ii</sup> which involved an S<sub>N</sub>2 reaction using methoxymethyl chloride (MOM-Cl) in the presence of NaH, as shown in Scheme S2. The *O*-protected aldehyde **1** was obtained with a yield of 64% (Scheme S2).

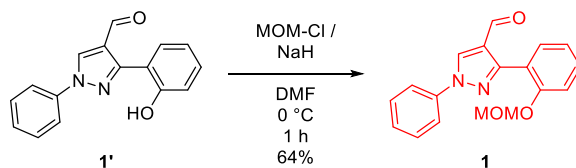

**Scheme S2.** Synthesis of 3-(2-(methoxymethoxy)phenyl)-1-phenyl-1*H*-pyrazole-4-carbaldehyde **1**.

### 2-Isocyano-1-morpholino-3-phenylpropan-1-one (**3**)

The  $\alpha$ -isocyanoacetamide **3** was synthesized following a previously reported method.<sup>iii</sup> Initially, racemic phenylalanine **18** underwent formylation using a mixed anhydride. This was followed by a peptide coupling reaction with morpholine **20**, and finally, an Ugi-type dehydration to yield the target compound **3**. The overall yield of  $\alpha$ -isocyanoacetamide was 52% (Scheme S3).

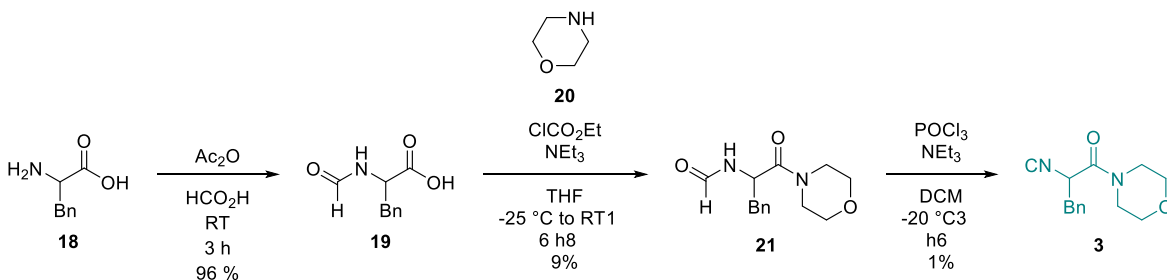

**Scheme S3.** Synthesis of the  $\alpha$ -isocyanoacetamide **3**.

(*E*)-2-(1-(2-Phenylhydrazono)ethyl)phenol (**17**).

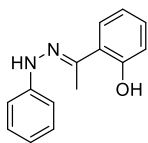

In a 50 mL round-bottom flask equipped with a magnetic stirring bar, 2.4 mL of 2'-hydroxyacetophenone (20.0 mmol, 1.0 equiv.) and 2.0 mL of phenylhydrazine (20.0 mmol, 1.0 equiv.) were dissolved in 25 mL of absolute ethanol, with 0.5 mL of glacial acetic acid used as a catalyst. The reaction mixture was stirred and refluxed for 8 hours.

Subsequently, the mixture was allowed to cool to room temperature, and the volume was reduced to half through evaporation. The remaining solution was then placed in a freezer to induce crystallization of the desired product. The crystallized product was collected by filtration, washed with cold water, and dried. A total of 4.51 g of an orange crystalline solid was obtained, representing a quantitative yield.  $R_f = 0.51$  (AcOEt:Hex 1:4 v/v).  $^1\text{H NMR}$  (500 MHz,  $\text{CDCl}_3$ ):  $\delta$  7.41 (ddd,  $J = 8.0, 1.6, 0.4$  Hz, 1H, H-3), 7.30 (dd,  $J = 8.6, 7.4$  Hz, 2H, H-13, H-15), 7.24–7.19 (m, 1H, H-5), 7.02 (d,  $J = 7.6$  Hz, 1H, H-12, H-16), 6.99 (ddd,  $J = 8.2, 1.3, 0.4$  Hz, 1H, H-6), 6.93 (tt,  $J = 7.4, 1.1$  Hz, 1H, H-14), 6.88 (ddd,  $J = 8.0, 7.2, 1.3$  Hz, 1H, H-4), 2.31 (s, 3H, H-10).  $^{13}\text{C NMR}$  (126 MHz,  $\text{CDCl}_3$ ):  $\delta$  157.9 (C-8), 147.3 (C-1), 143.9 (C-11), 129.9 (C-5), 129.5 (C-13, C-15), 126.7 (C-3), 121.1 (C-14), 120.0 (C-2), 118.8 (C-4), 117.3 (C-6), 113.1 (C-12, C-16), 11.6 (C-10).

3-(2-Hydroxyphenyl)-1-phenyl-1*H*-pyrazole-4-carbaldehyde (**1'**).

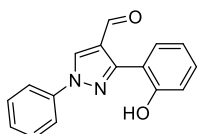

In a 50 mL round-bottom flask, 1.8 mL of DMF (23.4 mmol, 3.0 equiv.) was placed at 0 °C under an inert gas atmosphere, followed by the dropwise addition of 1.8 mL of  $\text{POCl}_3$  (19.3 mmol, 2.5 equiv.). After that, the reaction mixture was stirred at room temperature for 1 hour. Subsequently, a solution of 1.76 g of (*E*)-2-(1-(2-phenylhydrazono)ethyl)phenol (7.8 mmol, 1.0 equiv.) in 3 mL of DMF was added dropwise to the mixture, which was then heated to 60 °C for 8 hours. Upon completion of the reaction, the mixture was allowed to cool to room temperature and poured into ice-cold water. Finally, a saturated  $\text{NaHCO}_3$  solution was added until a pH of 6 was reached. The resulting precipitate was filtered, washed with water, and dried. A total of 0.78 g of a brown solid was obtained in an isolated yield of 38%.  $R_f = 0.33$  (AcOEt:Hex 3:7 v/v).  $^1\text{H NMR}$  (500 MHz,  $\text{CDCl}_3$ ):  $\delta$  10.19 (s, 1H, H-19), 8.58 (d,  $J = 0.4$  Hz, 1H, H-5), 7.94 (dd,  $J = 7.8, 1.7$  Hz, 1H, H-17), 7.72 (dd,  $J = 8.6, 1.2$  Hz, 2H, H-7, H-11), 7.57–7.50 (m, 2H, H-8, H-10), 7.47–7.40 (m, 1H, H-9), 7.36 (ddd,  $J = 8.3, 7.3, 1.7$  Hz, 1H, H-15), 7.11 (ddd,  $J = 8.2, 1.3, 0.4$  Hz, 1H, H-14), 7.03 (ddd,  $J = 7.8, 7.3, 1.2$  Hz, 1H, H-16).  $^{13}\text{C NMR}$  (126 MHz,  $\text{CDCl}_3$ ):  $\delta$  184.3 (C-18), 156.0 (C-13), 152.7 (C-3), 138.2 (C-6), 132.6 (C-5), 131.2 (C-15), 129.9 (C-8, C-10), 129.7 (C-17), 128.4 (C-9), 123.1 (C-4), 119.9 (C-16), 119.6 (C-7, C-11), 117.4 (C-14), 115.4 (C-12).

3-(2-(Methoxymethyl)phenyl)-1-phenyl-1*H*-pyrazole-4-carbaldehyde (**1**).

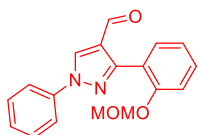

A suspension of 0.15 g of NaH (3.8 mmol, 1.7 equiv., 60% dispersion in mineral oil) was formed in a 50 mL round-bottom flask at 0 °C in 5 mL of DMF. To the resulting mixture, 0.60 g of 3-(2-hydroxyphenyl)-1-phenyl-1*H*-pyrazole-4-carbaldehyde (2.3 mmol, 1.0 equiv.) was added in portions and stirred for 30 minutes. After this time, 0.3 mL of MOM-Cl (3.8 mmol, 1.7 equiv.) was added, and the reaction was stirred at room temperature. After 30 minutes, 30 mL of  $\text{H}_2\text{O}$  was added, and the mixture was extracted with 3  $\times$  30 mL of ethyl acetate (AcOEt). The organic phase was dried over anhydrous  $\text{Na}_2\text{SO}_4$  and concentrated to dryness. The product was purified by column chromatography using a mixture of AcOEt:Hex (1:4, v/v), yielding 0.45 g of a light yellow solid with a yield of 64%.  $R_f = 0.40$  (AcOEt:Hex 3:7 v/v); melting point = 67 °C.  $^1\text{H NMR}$  (500 MHz,  $\text{CDCl}_3$ ):  $\delta$  9.84 (d,  $J = 0.5$  Hz, 1H, H-1), 8.51 (d,  $J = 0.4$  Hz, 1H, H-3), 7.77 (dd,  $J = 8.7, 1.2$  Hz, 2H, H-9, H-13), 7.61 (ddd,  $J =$

7.5, 1.8, 0.4 Hz, 2H, H-18), 7.50–7.44 (m, 2H, H-10, H-12), 7.42 (ddd,  $J = 8.4, 7.4, 1.8$  Hz, 2H, H-16), 7.37–7.31 (m, 1H, H-11), 7.28 (dd,  $J = 8.4, 0.7$  Hz, 1H, H-17), 7.14 (td,  $J = 7.5, 1.1$  Hz, 1H, H-15), 5.14 (s, 2H, H-21), 3.40 (s, 3H, H-23).  **$^{13}\text{C}$  NMR (126 MHz,  $\text{CDCl}_3$ ):**  $\delta$  186.2 (C-1), 154.9 (C-14), 152.0 (C-6), 139.1 (C-8), 131.2 (C-18), 130.8 (C-16), 129.5 (C-10, C-12), 128.8 (C-3), 127.6 (C-11), 123.3 (C-2), 122.2 (C-15), 121.3 (C-7), 119.5 (C-9, C-13), 115.0 (C-17), 95.1 (C-21), 56.2 (C-23). **HRMS:** (ESI+)  $m/z$  calculated for  $[\text{M}-\text{H}]^+ \text{C}_{18}\text{H}_{17}\text{N}_2\text{O}_3 + 309.1234$ , found 309.1239 (error = 1.8 ppm).

#### *N*-Formyl phenylalanine (**19**).

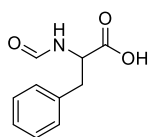

In a 250 mL round-bottom flask, 4.13 g of phenylalanine (25.0 mmol, 1 equiv.) were suspended in 50 mL of formic acid at 0 °C. Subsequently, 17 mL of  $\text{Ac}_2\text{O}$  (180.0 mmol, 7.2 equiv.) were added dropwise to the mixture under stirring. The reaction mixture was stirred for 2 hours at room temperature. After this time, 20 mL of a water/ice mixture was added, and the reaction mixture was concentrated to dryness. The crude reaction product was used for the next step without purification. A total of 4.65 g (96%) of a grayish-white powder was obtained.

#### *N*-(1-Morpholino-1-oxo-3-phenylpropan-2-yl)formamide (**21**).

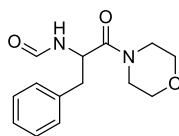

In a 250 mL round-bottom flask, 4.5 g (23.3 mmol, 1.0 equiv.) of the product obtained in the previous step were diluted in 80 mL of THF. The mixture was cooled to -25 °C under an inert gas atmosphere, and 2.5 mL of ethyl chloroformate (25.6 mmol, 1.1 equiv.) and 4.3 mL of  $\text{Et}_3\text{N}$  (30.3 mmol, 1.3 equiv.) were added. After 30 minutes, 2.5 mL of morpholine (27.9 mmol, 1.2 equiv.) were added, and the reaction mixture was stirred at -25 °C for one hour, then at room temperature for 16 hours. After this time, a saturated  $\text{NaHCO}_3$  solution was added, and the mixture was extracted with  $3 \times 50$  mL of  $\text{AcOEt}$ . The organic phase was washed with a saturated  $\text{NaCl}$  solution, dried over anhydrous  $\text{Na}_2\text{SO}_4$ , concentrated to dryness, and the crude reaction product was used in the next step without purification. A total of 5.29 g (89%) of a yellow oil was obtained.

#### 2-Isocyano-1-morpholino-3-phenylpropan-1-one (**3**).

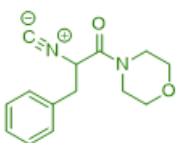

In a 250 mL round-bottom flask, 4.8 g of the product obtained in the previous step were diluted in 90 mL of DCM under an inert gas atmosphere with constant stirring. The temperature was lowered to -25 °C, 15.5 mL of  $\text{Et}_3\text{N}$  (111.2 mmol, 6.1 equiv.) were added, and the mixture was stirred for 10 minutes. Subsequently, 2.7 mL of  $\text{POCl}_3$  (28.9 mmol, 1.6 equiv.) were added dropwise, and the reaction mixture was stirred for 3 hours at -25 °C. After this time, a saturated  $\text{K}_2\text{CO}_3$  aqueous solution was added, and the mixture was extracted with  $3 \times 50$  mL of DCM. The organic phase was washed with a saturated  $\text{NaCl}$  aqueous solution, dried over anhydrous  $\text{Na}_2\text{SO}_4$ , concentrated to dryness, and purified by column chromatography using an  $\text{AcOEt}:\text{Hex}$  2:3 (v/v) mixture. A total of 3.0 g of a white crystalline solid was obtained with a isolated yield of 61%.  $R_f = 0.40$  ( $\text{AcOEt}:\text{Hex}$  2:3 v/v);  **$^1\text{H}$  NMR (500 MHz,  $\text{CDCl}_3$ ):**  $\delta$  7.37–7.24 (m, 5H, H-8, H-9, H-10, H-11, H-12), 4.54 (dd,  $J = 7.9, 6.7$  Hz, 1H, H-1), 3.71–3.17 (m, 10H, H-6, H-13, H-14, H-16, H-17).  **$^{13}\text{C}$  NMR (126 MHz,  $\text{CDCl}_3$ ):**  $\delta$  163.4 (C-2), 160.1 (C-18), 135.0 (C-7), 129.4 (C-9, C-11), 128.8 (C-8, C-12), 127.7 (C-10), 66.4 (C-1), 46.3 (C-14, C-16), 42.9 (C-13, C-17), 39.0 (C-6).

### Synthesis of the pyrazole-derived pyrrolo[3,4-*b*]pyridin-5-ones **6a-f**.

The MOM-protected aldehyde **1** (1.0 equiv.) and the corresponding amine **2a-f** (1.2 equiv.) were introduced into a sealed 10 mL CEM Discover microwave reaction tube and dissolved in 1.0 mL of dry toluene. The reaction mixture was stirred and heated under microwave irradiation (60 °C, 100 W) for 30 minutes. Subsequently, Sc(OTf)<sub>3</sub> (10 mol%) was added, and the mixture was stirred and further heated under microwave irradiation (60 °C, 100 W) for 5 minutes. The isocyanide **3** (1.2 equiv.) was then added, and the reaction was again stirred and irradiated (60 °C, 100 W) for 30 minutes. Maleic anhydride (1.4 equiv.) was added, and the mixture was subjected to additional stirring and microwave irradiation (60 °C, 100 W) for 30 minutes. The crude product was purified via column chromatography using a 2:3 (v/v) mixture of hexane and ethyl acetate (Hex). The isolated compound was subsequently dissolved in 3 mL of THF, to which 0.1 mL of concentrated HCl was added. The solution was heated under microwave irradiation (60 °C, 100 W) for 30 minutes. After evaporating the THF, the reaction mixture was neutralized with a saturated NaHCO<sub>3</sub> aqueous solution and extracted with 3 × 5 mL of ethyl acetate. The organic phase was dried over Na<sub>2</sub>SO<sub>4</sub>, evaporated, and the final compound was purified by preparative thin-layer chromatography (TLC) using a mixture of hexane and ethyl acetate as the mobile phase in either a 2:3 (v/v) or 1:4 (v/v) ratio.

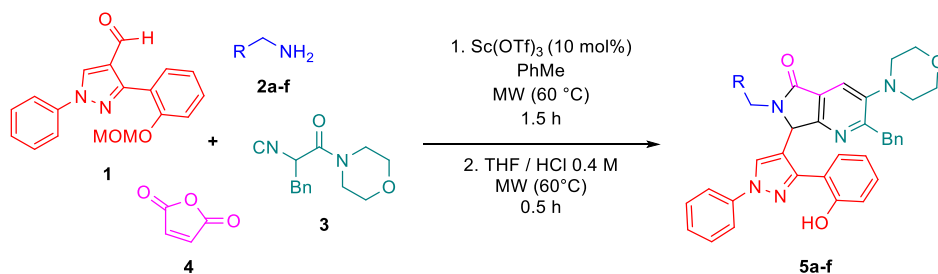

**Scheme S4.** Multicomponent assembly of pyrrolo[3,4-*b*]pyridin-5-ones derived from pyrazole via an Ugi-Zhu/Aza-Diels-Alder sequence.

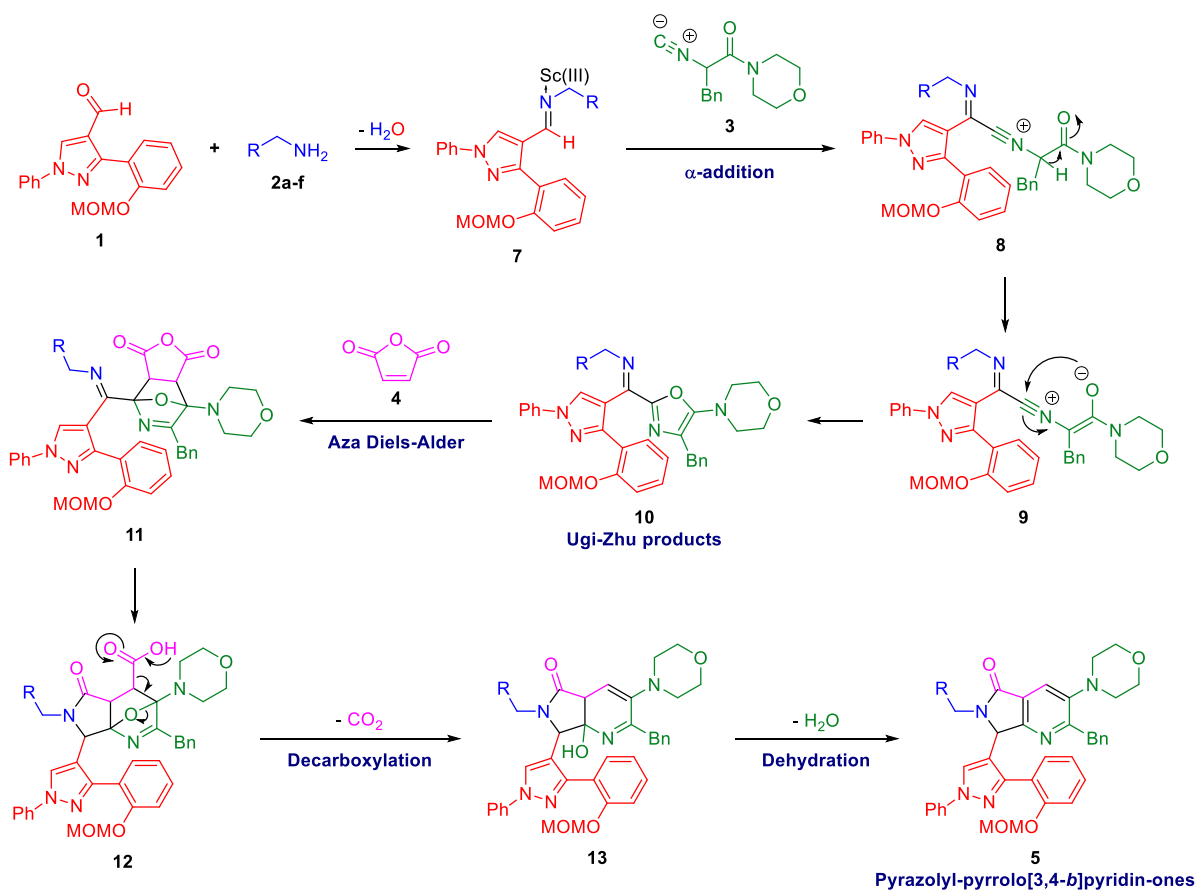

**Scheme S5.** Reaction mechanism of the UZ-3CR process and the transformation of 5-aminoxazoles into pyrazolyl-pyrrolo[3,4-*b*]pyridin-5-ones.

2,6-Dibenzyl-7-(3-(2-hydroxyphenyl)-1-phenyl-1*H*-pyrazol-4-yl)-3-morpholino-6,7-dihydro-5*H*-pyrrolo[3,4-*b*]pyridin-5-one (**6a**).

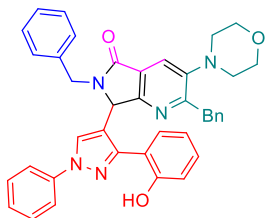

According to the general procedure, 3-(2-(methoxymethyl)phenyl)-1-phenyl-1*H*-pyrazol-4-carbaldehyde (92.9 mg), benzylamine (39.3  $\mu$ L), Sc(OTf)<sub>3</sub> (14.8 mg), 2-isocyanomorpholino-3-phenylpropan-1-one (89.6 mg), and maleic anhydride (29.9 mg) were used. The compound (23.4 mg, 12%) was isolated as a pale yellow solid.  $R_f$  = 0.25 (AcOEt-Hex 2:3 v/v); M.P. = 190–192 °C. **<sup>1</sup>H NMR (500 MHz, CDCl<sub>3</sub>):**  $\delta$  9.77 (s, 1H, H-48), 7.91 (s, 1H, H-6), 7.81 (s, 1H, H-43), 7.63 (s, 1H, H-27), 7.59 (dt,  $J$  = 8.0, 1.1 Hz, 2H, H-37, H-41), 7.50–7.39 (m, 2H, H-38, H-40), 7.31 (ddt,  $J$  = 7.8, 7.0, 1.1 Hz, 1H, H-39), 7.29–7.01 (m, 13H, H-17, H-18, H-19, H-20, H-21, H-22, H-23, H-24, H-25, H-26, H-45, H-46), 6.73 (td,  $J$  = 7.5, 1.2 Hz, 1H, H-44), 5.62 (s, 1H, H-9), 5.20 (d,  $J$  = 14.7 Hz, 1H, H-11), 4.40 (d,  $J$  = 13.8 Hz, 1H, H-14), 4.09 (t,  $J$  = 14.4 Hz, 2H, H-11', H-14'), 3.85 (ddd,  $J$  = 5.2, 3.7, 1.2 Hz, 4H, H-32, H-34), 2.87 (ddt,  $J$  = 39.1, 11.9, 4.6 Hz, 4H, H-31, H-35). **<sup>13</sup>C NMR (126 MHz, CDCl<sub>3</sub>):**  $\delta$  166.6 (C-7), 162.2 (C-4), 160.3 (C-2), 155.3 (C-47), 151.1 (C-13), 147.9 (C-5), 139.1 (C-15), 138.9 (C-36), 136.3 (C-12), 130.1 (C-45), 129.6 (C-38, C-40), 129.3 (C-43), 129.1 (C-22, C-26), 128.7 (C-17, C-21), 128.5 (C-18, C-20), 128.3 (C-23, C-25), 127.7 (C-19), 127.3 (C-30), 127.3 (C-27, C-39), 127.2 (C-24), 124.0 (C-6), 123.6 (C-1), 119.7 (C-44), 118.8 (C-37, C-41), 116.9 (C-46), 116.7 (C-42), 67.1 (C-31, C-35), 56.3 (C-9), 53.1 (C-32, C-34), 44.4 (C-11), 39.7 (C-14). **FT-IR** ( $\nu$  cm<sup>-1</sup>): 3365, 2825, 2364, 1688, 1596, 1508, 1388, 1221, 1112, 824, 755, 697, 478. **HRMS: (ESI<sup>+</sup>)**  $m/z$  calcd. for [M-H]<sup>+</sup> C<sub>40</sub>H<sub>36</sub>N<sub>5</sub>O<sub>3</sub><sup>+</sup> 634.2813; found 634.2825 (error = 1.9 ppm).

2-Benzyl-6-butyl-7-(3-(2-hydroxyphenyl)-1-phenyl-1*H*-pyrazol-4-yl)-3-morpholino-6,7-dihydro-5*H*-pyrrolo[3,4-*b*]pyridin-5-one (**6b**).

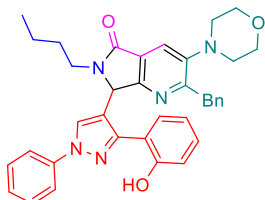

According to the general procedure, 3-(2-(methoxymethyl)phenyl)-1-phenyl-1*H*-pyrazol-4-carbaldehyde (92.8 mg), butylamine (35.6  $\mu$ L), Sc(OTf)<sub>3</sub> (7.4 mg), 2-isocyanomorpholino-3-phenylpropan-1-one (89.4 mg), and maleic anhydride (29.3 mg) were used. The compound (46.2 mg, 26%) was isolated as a pale yellow solid.  $R_f$  = 0.20 (AcOEt-Hex 2:3 v/v); M.P. = 224 °C. **<sup>1</sup>H NMR (500 MHz, CDCl<sub>3</sub>):**  $\delta$  8.16 (s, 1H, H-33), 7.89 (s, 1H, H-6), 7.69 (s, 1H, H-18), 7.63 (dd,  $J$  = 8.7, 1.1 Hz, 2H, H-24, H-28), 7.46 (dd,  $J$  = 8.4, 7.6 Hz, 2H, H-25, H-27), 7.35–7.29 (m, 2H, H-26, H-31), 7.25–7.18 (m, 5H, H-41, H-42, H-43, H-44, H-45), 7.11 (dd,  $J$  = 8.2, 1.2 Hz, 1H, H-30), 6.89 (td,  $J$  = 7.5, 1.2 Hz, 1H, H-32), 5.85 (s, 1H, H-9), 4.44 (d,  $J$  = 13.7 Hz, 1H, H-17), 4.10 (d,  $J$  = 13.7 Hz, 1H, H-17'), 3.99 (dt,  $J$  = 13.8, 7.9 Hz, 1H, H-11), 3.86 (ddd,  $J$  = 5.2, 3.7, 1.2 Hz, 4H, H-36, H-38), 3.01–2.77 (m, 5H, H-11', H-35, H-39), 1.49–1.37 (m, 2H, H-12), 1.27–1.18 (m, 2H, H-13), 0.81 (t,  $J$  = 7.3 Hz, 3H, H-14). **<sup>13</sup>C NMR (126 MHz, CDCl<sub>3</sub>):**  $\delta$  166.7 (C-7), 161.9 (C-4), 160.3 (C-2), 155.5 (C-29), 151.0 (C-21), 147.9 (C-5), 139.3 (C-40), 138.9 (C-22), 130.1 (C-31), 129.6 (C-25, C-27), 129.1 (C-42, C-44), 128.3 (C-41, C-45), 127.2 (C-26), 126.8 (C-18), 126.3 (C-43), 123.9 (C-1), 123.9 (C-6), 119.8 (C-32), 118.7 (C-24, C-28), 117.1 (C-30), 116.8 (C-23), 67.2 (C-36, C-38), 56.4 (C-9), 53.1 (C-35, C-39), 40.0 (C-17), 39.7 (C-17), 30.2 (C-12), 19.9 (C-13), 13.6 (C-14). **FT-IR** ( $\nu$  cm<sup>-1</sup>): 3356, 2975, 2828, 2102, 1688, 1606, 1502, 1445, 1376, 1218, 1114, 957, 816, 755, 696, 481. **HRMS: (ESI<sup>+</sup>)**  $m/z$  calcd. for [M-H]<sup>+</sup> C<sub>37</sub>H<sub>38</sub>N<sub>5</sub>O<sub>3</sub><sup>+</sup> 600.2969; found 600.2970 (error = 0.1 ppm).

2-Benzyl-7-(3-(2-hydroxyphenyl)-1-phenyl-1*H*-pyrazol-4-yl)-3-morpholino-6-phenethyl-6,7-dihydro-5*H*-pyrrolo[3,4-*b*]pyridin-5-one (**6c**).



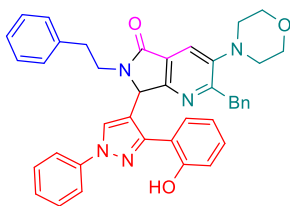

According to the general procedure, 3-(2-(methoxymethyl)phenyl)-1-phenyl-1*H*-pyrazol-4-carbaldehyde (154.3 mg), phenethylamine (75.4  $\mu$ L), Sc(OTf)<sub>3</sub> (12.3 mg), 2-isocyan-1-morpholino-3-phenylpropan-1-one (146.9 mg), and maleic anhydride (49.0 mg). The compound (63.6 mg, 20%) was isolated as a light yellow solid.  $R_f$  = 0.45 (AcOEt-Hex 3:2 v/v); M.P. = 195–197 °C. **<sup>1</sup>H NMR (500 MHz, CDCl<sub>3</sub>):**  $\delta$  9.90 (s, 1H, H-43),

7.89 (s, 1H, H-6), 7.60 (dd,  $J$  = 8.7, 1.2 Hz, 2H, H-28, H-32), 7.56 (s, 1H, H-17), 7.45 (dd,  $J$  = 8.5, 7.6 Hz, 1H, H-29, H-31), 7.35–7.27 (m, 2H, H-27, H-30), 7.26–6.95 (m, 12H, H-24, H-25, H-33, H-34, H-35, H-36, H-37, H-45, H-46, H-47, H-48, H-49), 6.82 (t,  $J$  = 7.6 Hz, 1H, H-26), 5.55 (s, 1H, H-9), 4.38 (d,  $J$  = 13.8 Hz, 1H, H-16), 4.27 (ddd,  $J$  = 13.9, 7.4, 6.3 Hz, 1H, H-11), 4.09 (d,  $J$  = 13.8 Hz, 1H, 16'), 3.86 (t,  $J$  = 3.8 Hz, 4H, H-39, H-41), 3.23 (dt,  $J$  = 14.0, 7.5 Hz, 1H, H-11'), 3.00–2.74 (m, 6H, H-12, H-38, H-42). **<sup>13</sup>C NMR (126 MHz, CDCl<sub>3</sub>):**  $\delta$  166.8 (C-7), 161.9 (C-4), 160.2 (C-2), 155.4 (C-20), 151.0 (C-14), 147.8 (C-5), 139.2 (C-44), 138.8 (C-21), 138.2 (C-13), 130.1 (C-27), 129.6 (C-23, C-31), 129.2 (C-47), 129.0 (C-48, C-46), 128.5 (C-34, C-36), 128.5 (C-33, C-37), 128.3 (C-45, C-49), 127.2 (C-30), 127.0 (C-17), 126.6 (C-25), 126.3 (C-24), 123.8 (C-6), 119.8 (C-26), 118.7 (C-28, C-32), 117.0 (C-35), 116.6 (C-1), 67.2 (C-39, C-41), 57.1 (C-9), 53.1 (C-38, C-42), 41.7 (C-11), 39.7 (C-16), 34.6 (C-12). **FT-IR** ( $\nu$  cm<sup>-1</sup>): 3339, 2973, 2879, 2831, 1688, 1601, 1507, 1439, 1391, 1212, 1156, 1111, 948, 815, 753, 694, 542, 480. **HRMS: (ESI<sup>+</sup>)**  $m/z$  calcd. for [M-H]<sup>+</sup> C<sub>41</sub>H<sub>37</sub>N<sub>5</sub>O<sub>3</sub> + 648.2969 found 648.2969 (error = 0 ppm).

2-Benzyl-6-(3,4-dimethoxybenzyl)-7-(3-(2-hydroxyphenyl)-1-phenyl-1*H*-pyrazol-4-yl)-3-morpholino-6,7-dihydro-5*H*-pyrrolo[3,4-*b*]pyridin-5-one (**6d**).

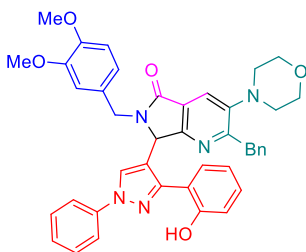

According to the general procedure, 3-(2-(methoxymethyl)phenyl)-1-phenyl-1*H*-pyrazol-4-carbaldehyde (154.0 mg), 3,4-dimethoxybenzylamine (90.5  $\mu$ L), Sc(OTf)<sub>3</sub> (22.7 mg), 2-isocyan-1-morpholino-3-phenylpropan-1-one (146.3 mg), and maleic anhydride (49.0 mg). The compound (34.3 mg, 10%) was isolated as a light yellow solid.  $R_f$  = 0.38 (AcOEt-Hex 3:2 v/v); M.P. = 65 °C. **<sup>1</sup>H NMR (500 MHz, CDCl<sub>3</sub>):**  $\delta$  9.89 (s, 1H, H-31), 7.96 (s, 1H, H-25), 7.90 (s, 1H, H-6), 7.65 (s, 1H, H-15), 7.61 (dd,  $J$  = 8.7, 1.1 Hz, 2H, H-26, H-30), 7.50–

7.42 (m, 2H, H-27, H-29), 7.36–7.30 (m, 1H, H-28), 7.29 (d,  $J$  = 1.7 Hz, 1H, H-23), 7.25–7.12 (m, 5H, H-46, H-47, H-48, H-49, H-50), 7.10 (dd,  $J$  = 8.2, 1.2 Hz, 1H, H-22), 6.76 (td,  $J$  = 7.4, 1.2 Hz, 1H, H-24), 6.58 (s, 1H, H-41), 6.55 (d,  $J$  = 1.1 Hz, 2H, H-37, H-38), 5.64 (s, 1H, H-9), 5.14 (d,  $J$  = 14.4 Hz, 1H, H-12), 4.43 (d,  $J$  = 13.8 Hz, 1H, H-44), 4.03 (dd,  $J$  = 17.0, 14.1 Hz, 2H, H-12', H-44'), 3.86 (ddd,  $J$  = 5.3, 3.6, 1.4 Hz, 4H, H-33, H-35), 3.72 (s, 3H, H-43), 3.57 (s, 3H, H-42), 2.97–2.77 (m, 4H, H-32, H-36). **<sup>13</sup>C NMR (126 MHz, CDCl<sub>3</sub>):**  $\delta$  166.6 (C-7), 162.2 (C-4), 160.4 (C-2), 155.3 (C-21), 151.2 (C-14), 149.1 (C-40), 148.6 (C-39), 147.8 (C-5), 139.2 (C-45), 138.9 (C-19), 130.2 (C-23), 129.6 (C-27, C-29), 129.3 (C-25), 129.1 (C-47, C-49), 128.8 (C-13), 128.3 (C-46, C-50), 127.2 (C-28), 127.1 (C-15), 126.3 (C-48), 124.0 (C-6), 123.5 (C-1), 121.2 (C-37), 119.8 (C-24), 118.7 (C-26, C-30), 116.9 (C-22), 116.7 (C-18), 116.6 (C-20), 111.6 (C-41), 111.1 (C-38), 67.1 (C-33), 57.0 (C-9), 53.1 (C-36, C-42), 41.7 (C-12), 39.7 (C-44), 34.7 (C-12). **FT-IR** ( $\nu$  cm<sup>-1</sup>): 3332, 2970, 2879, 2080, 1685, 1601, 1592, 1512, 1441, 1391, 1259, 1106, 1031, 809, 759, 695, 551, 479. **HRMS: (ESI<sup>+</sup>)**  $m/z$  calcd. for [M-H]<sup>+</sup> C<sub>43</sub>H<sub>43</sub>N<sub>5</sub>O<sub>5</sub> + 670.3307 found 670.3310 (error = 0.4 ppm).

2-Benzyl-6-(4-fluorobenzyl)-7-(3-(2-hydroxyphenyl)-1-phenyl-1*H*-pyrazol-4-yl)-3-morpholino-6,7-dihydro-5*H*-pyrrolo[3,4-*b*]pyridin-5-one (**6e**).

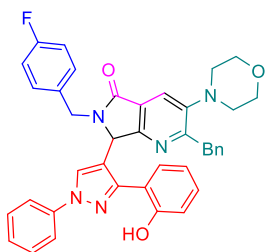

According to the general procedure, 3-(2-(methoxymethyl)phenyl)-1-phenyl-1*H*-pyrazol-4-carbaldehyde (154.0 mg), 4-fluorobenzylamine (68.6  $\mu$ L), Sc(OTf)<sub>3</sub> (24.6 mg), 2-isocyanomorpholino-3-phenylpropan-1-one (147.0 mg), and maleic anhydride (50.2 mg) were used. The compound (84.2 mg, 26%) was isolated as a light yellow solid.  $R_f$  = 0.38 (AcOEt-Hex 3:2 v/v); Melting Point = 185–187 °C. **<sup>1</sup>H NMR (500 MHz, CDCl<sub>3</sub>):**  $\delta$  7.91 (s, 1H, H-6), 7.82 (s, 1H, H-27), 7.62 (s, 1H, H-17), 7.60 (dd,  $J$  = 8.7, 1.1 Hz, 1H, H-33, H-37), 7.50–7.43 (m, 2H, H-34, H-36), 7.36–7.29 (m, 1H, H-35), 7.28 (ddd,  $J$  = 8.2, 7.3, 1.7 Hz, 1H, H-25), 7.25–7.12 (m, 5H, H-28, H-29, H-30, H-31, H-32), 7.11 (dd,  $J$  = 8.3, 1.1 Hz, 1H, H-24), 6.98 (dd,  $J$  = 8.7, 5.3 Hz, 2H, H-44, H-48), 6.81–6.74 (m, 3H, H-26, H-45, H-47), 5.60 (s, 1H, H-9), 5.15 (d,  $J$  = 14.7 Hz, 1H, H-14), 4.41 (d,  $J$  = 13.7 Hz, 1H, H-12), 4.06 (dd,  $J$  = 18.7, 14.2 Hz, 2H, H-12', H-14'), 3.86 (ddd,  $J$  = 5.2, 3.7, 1.1 Hz, 4H, H-40, H-42), 2.96–2.80 (m, 4H, H-39, H-43). **<sup>13</sup>C NMR (126 MHz, CDCl<sub>3</sub>):**  $\delta$  166.6 (C-7), 163.2 (<sup>1</sup> $J_{C-F}$  = 246.5 Hz, C-46), 162.3 (C-4), 160.2 (C-2), 155.2 (C-23), 151.1 (C-16), 147.9 (C-5), 139.1 (C-13), 138.9 (C-21), 132.1 (<sup>4</sup> $J_{C-F}$  = 3.4 Hz, C-15), 130.2 (C-25), 130.2 (<sup>3</sup> $J_{C-F}$  = 7.6 Hz, C-44, C-48), 129.6 (C-34, C-36), 129.2 (C-27), 129.1 (C-29, C-31), 128.3 (C-28, C-32), 127.3 (C-35), 127.2 (C-17), 126.3 (C-30), 124.0 (C-6), 123.5 (C-1), 119.8 (C-26), 118.7 (C-33, C-37), 117.0 (C-24), 116.6 (C-20), 115.6 (<sup>2</sup> $J_{C-F}$  = 21.9 Hz, C-45, C-47), 67.1 (C-40, C-42), 56.1 (C-9), 53.1 (C-39, C-43), 43.6 (C-14), 39.7 (C-12). **<sup>19</sup>F NMR (471 MHz, CDCl<sub>3</sub>):**  $\delta$  -115.95 (tt,  $J_{F-H}$  = 8.5, 5.2 Hz). **FT-IR** ( $\nu$  cm<sup>-1</sup>): 3337, 2964, 2830, 2102, 1686, 1595, 1507, 1442, 1384, 1217, 1107, 1029, 909, 817, 759, 691, 477. **HRMS:** (ESI<sup>+</sup>)  $m/z$  calcd. for [M-H]<sup>+</sup> C<sub>40</sub>H<sub>35</sub>FN<sub>5</sub>O<sub>3</sub> + 652.2718 found 652.2707 (error = 1.7 ppm).

2-Benzyl-7-(3-(2-hydroxyphenyl)-1-phenyl-1*H*-pyrazol-4-yl)-3-morpholino-6-(prop-2-yn-1-yl)-6,7-dihydro-5*H*-pyrrolo[3,4-*b*]pyridin-5-one (**6f**).

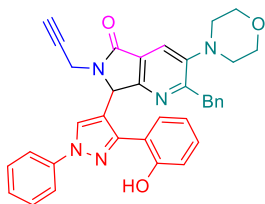

According to the general procedure, 3-(2-(methoxymethyl)phenyl)-1-phenyl-1*H*-pyrazol-4-carbaldehyde (92.6 mg), propargylamine (23.1  $\mu$ L), ScOTf<sub>3</sub> (14.8 mg), 2-isocyanomorpholino-3-phenylpropan-1-one (88.1 mg), and maleic anhydride (40.0 mg) were used. The compound (43.0 mg, 25%) was isolated as a light pink solid.  $R_f$  = 0.50 (AcOEt-Hex 3:2 v/v); Melting Point = 90–92 °C. **<sup>1</sup>H NMR (500 MHz, CDCl<sub>3</sub>):**  $\delta$  8.00 (s, 1H, H-28), 7.89 (s, 1H, H-6), 7.81 (s, 1H, H-18), 7.69–7.59 (m, 2H, H-34, H-38), 7.46 (dd,  $J$  = 8.7, 7.3 Hz, 2H, H-35, H-37), 7.38–7.29 (m, 1H, H-36), 7.29–7.14 (m, 6H, H-26, H-29, H-30, H-31, H-32, H-33), 7.08 (dd,  $J$  = 8.2, 0.9 Hz, 1H, H-25), 6.82 (td,  $J$  = 7.5, 1.3 Hz, 1H, H-27), 6.04 (s, 1H, H-9), 4.77 (dd,  $J$  = 17.6, 2.6 Hz, 1H, H-14), 4.41 (d,  $J$  = 13.8 Hz, 1H, H-12), 4.11 (d,  $J$  = 13.8 Hz, 1H, H-12'), 3.90–3.80 (m, 5H, H-14', H-41, H-43), 2.95–2.78 (m, 4H, H-40, H-44), 2.11 (t,  $J$  = 2.5 Hz, 1H, H-16). **<sup>13</sup>C NMR (126 MHz, CDCl<sub>3</sub>):**  $\delta$  166.3 (C-7), 162.5 (C-4), 160.0 (C-2), 155.4 (C-24), 151.1 (C-21), 148.0 (C-5), 139.1 (C-13), 138.9 (C-22), 130.1 (C-31), 129.6 (C-35, C-37), 129.2 (C-28), 129.0 (C-30, C-32), 128.3 (C-29, C-33), 127.5 (C-18), 127.2 (C-36), 126.3 (C-26), 123.9 (C-6), 123.2 (C-1), 119.6 (C-27), 118.8 (C-34, C-38), 116.9 (C-25), 116.7 (C-23), 116.2 (C-17), 77.6 (C-15), 72.8 (C-16), 67.1 (C-41, C-43), 56.6 (C-9), 53.1 (C-40, C-44), 39.8 (C-12), 30.2 (C-14). **FT-IR** ( $\nu$  cm<sup>-1</sup>): 3337, 2966, 2885, 1684, 1601, 1503, 1448, 1383, 1259, 1118, 1030, 956, 814, 750, 691, 549, 482. **HRMS:** (ESI<sup>+</sup>)  $m/z$  calcd. for [M-H]<sup>+</sup> C<sub>36</sub>H<sub>32</sub>N<sub>5</sub>O<sub>3</sub> + 582.2500 found 582.2493 (error = 1.1 ppm).

**NMR spectra of all synthesized compounds.**

*(E)*-2-(1-(2-Phenylhydrazono)ethyl)phenol.

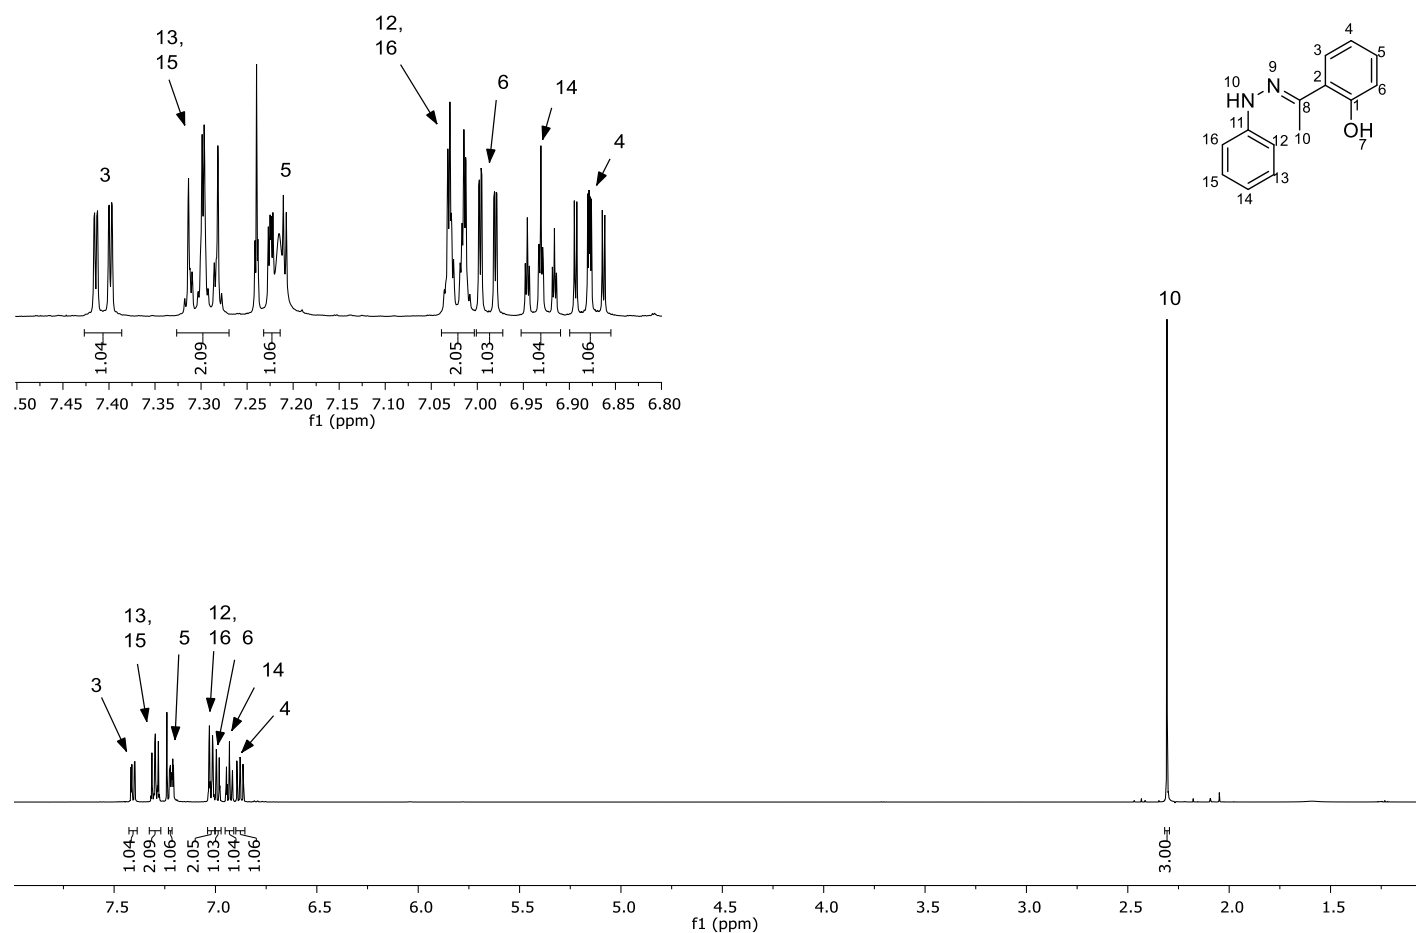

**Figure S1.** <sup>1</sup>H NMR spectrum of *(E)*-2-(1-(2-Phenylhydrazono)ethyl)phenol in CDCl<sub>3</sub> at 500 MHz.

3-(2-Hydroxyphenyl)-1-phenyl-1*H*-pyrazole-4-carbaldehyde.

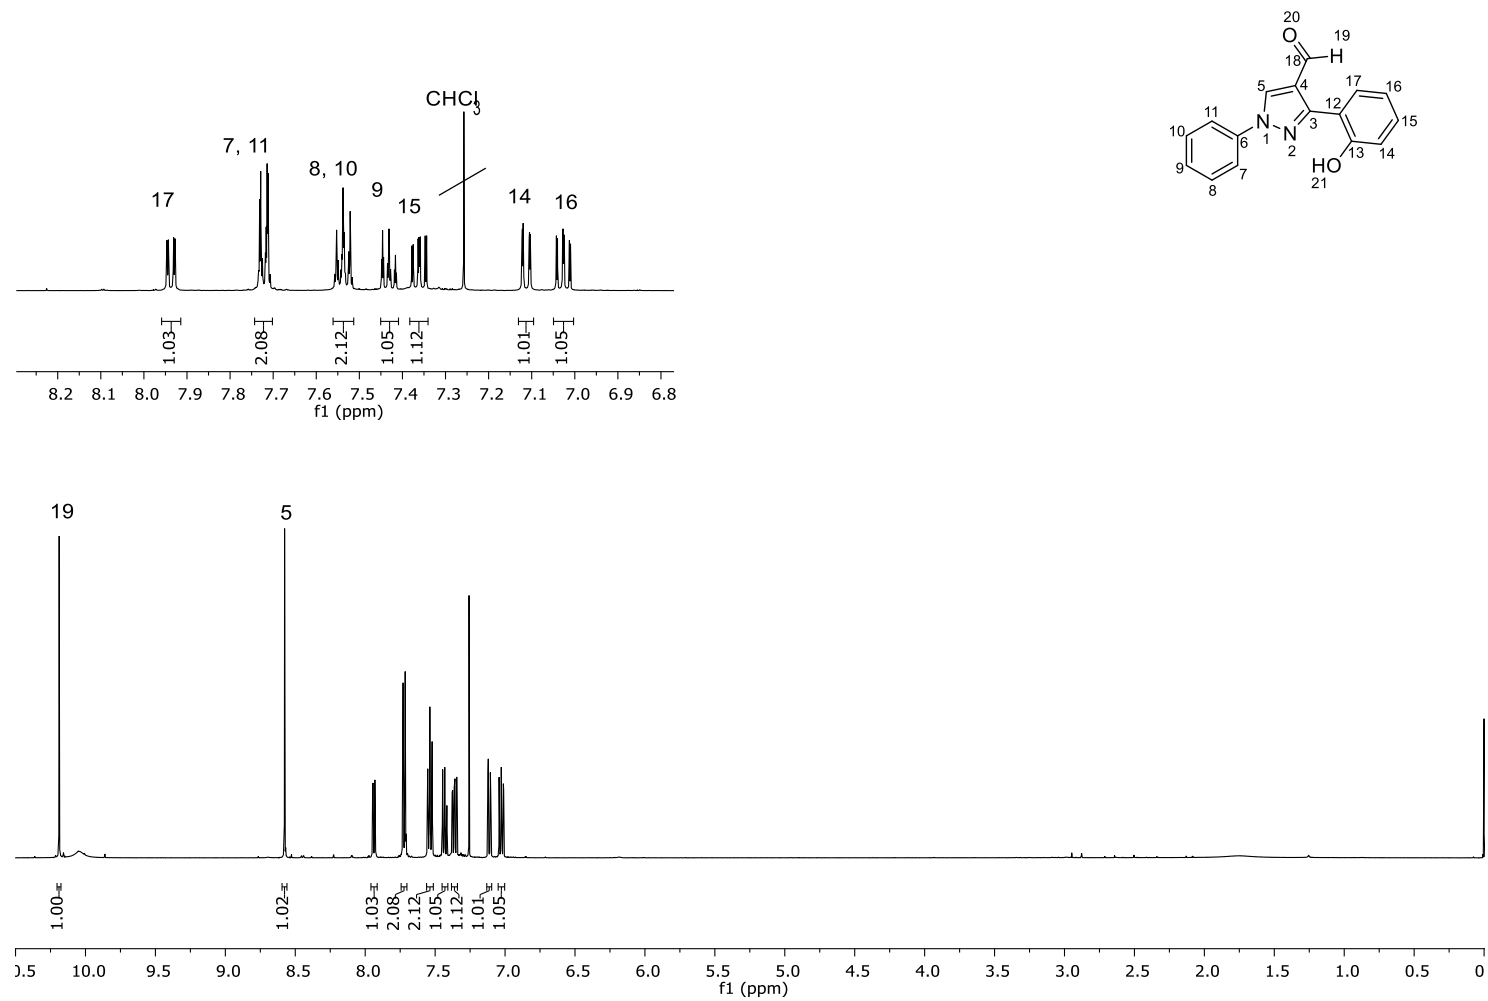

**Figure S2.** <sup>1</sup>H NMR spectrum of 3-(2-Hydroxyphenyl)-1-phenyl-1*H*-pyrazole-4-carbaldehyde in CDCl<sub>3</sub> at 500 MHz.

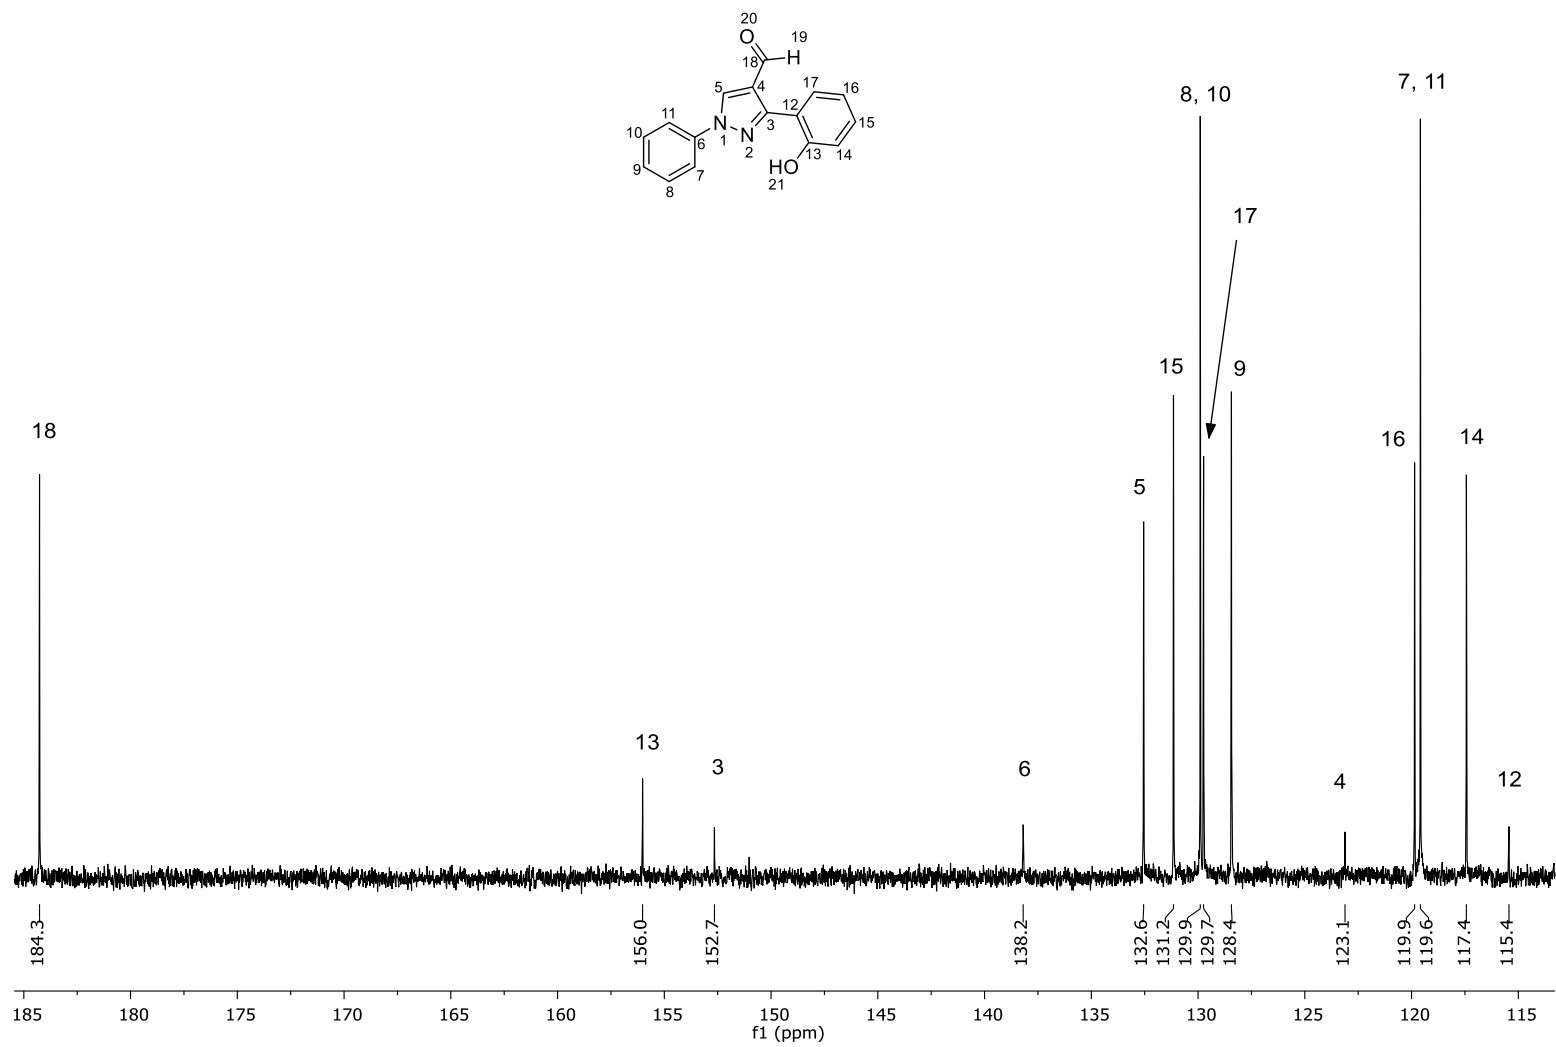

**Figure S3.** <sup>13</sup>C NMR spectrum of 3-(2-Hydroxyphenyl)-1-phenyl-1*H*-pyrazole-4-carbaldehyde in CDCl<sub>3</sub> at 126 MHz.

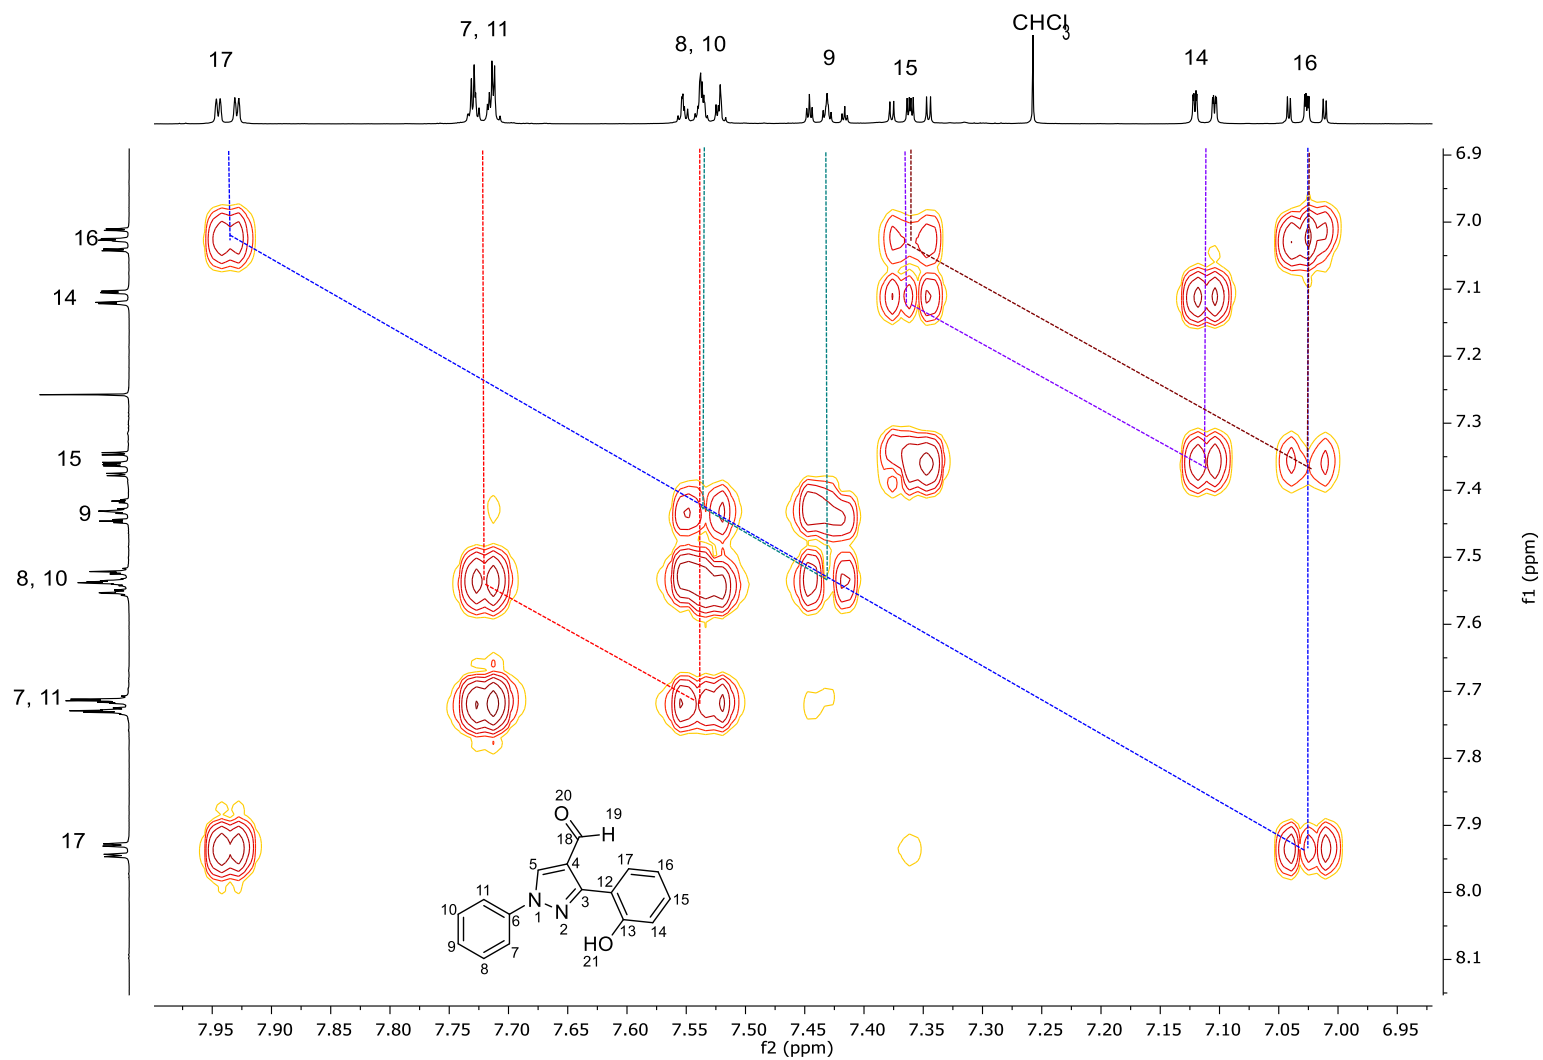

**Figure S4.** 2D NMR (COSY) spectrum of 3-(2-Hydroxyphenyl)-1-phenyl-1H-pyrazole-4-carbaldehyde.

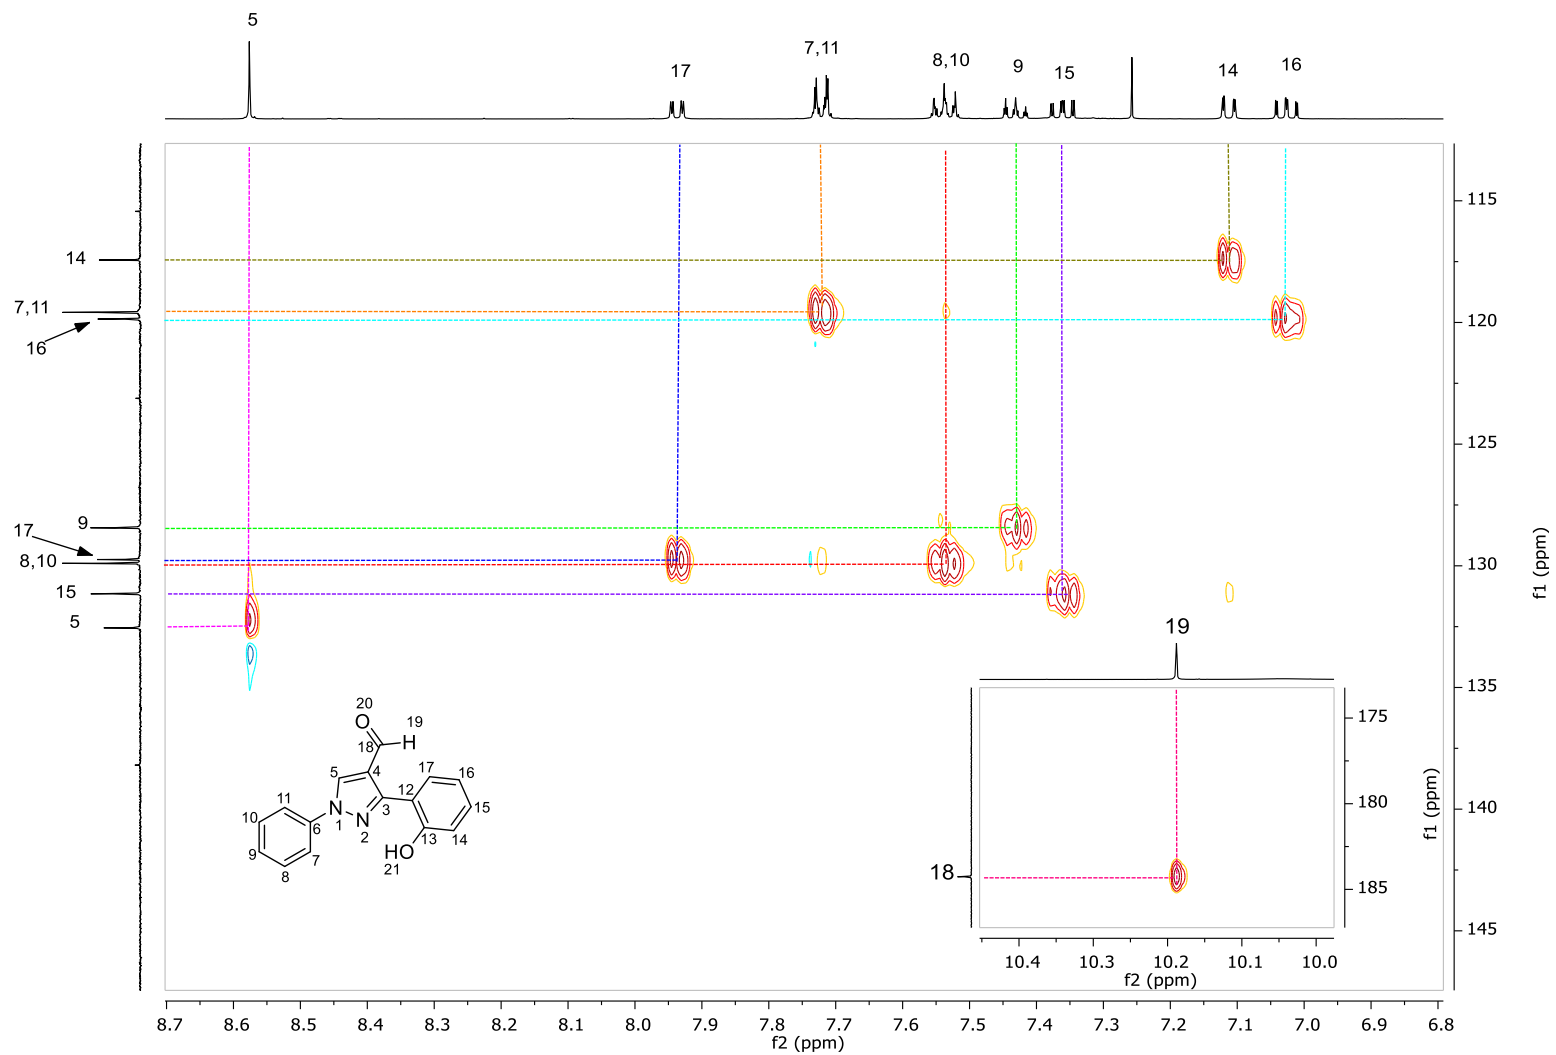

**Figure S5.** 2D NMR (HSQC) spectrum of 3-(2-Hydroxyphenyl)-1-phenyl-1H-pyrazole-4-carbaldehyde.

3-(2-(Methoxymethyl)phenyl)-1-phenyl-1H-pyrazole-4-carbaldehyde (**1**).

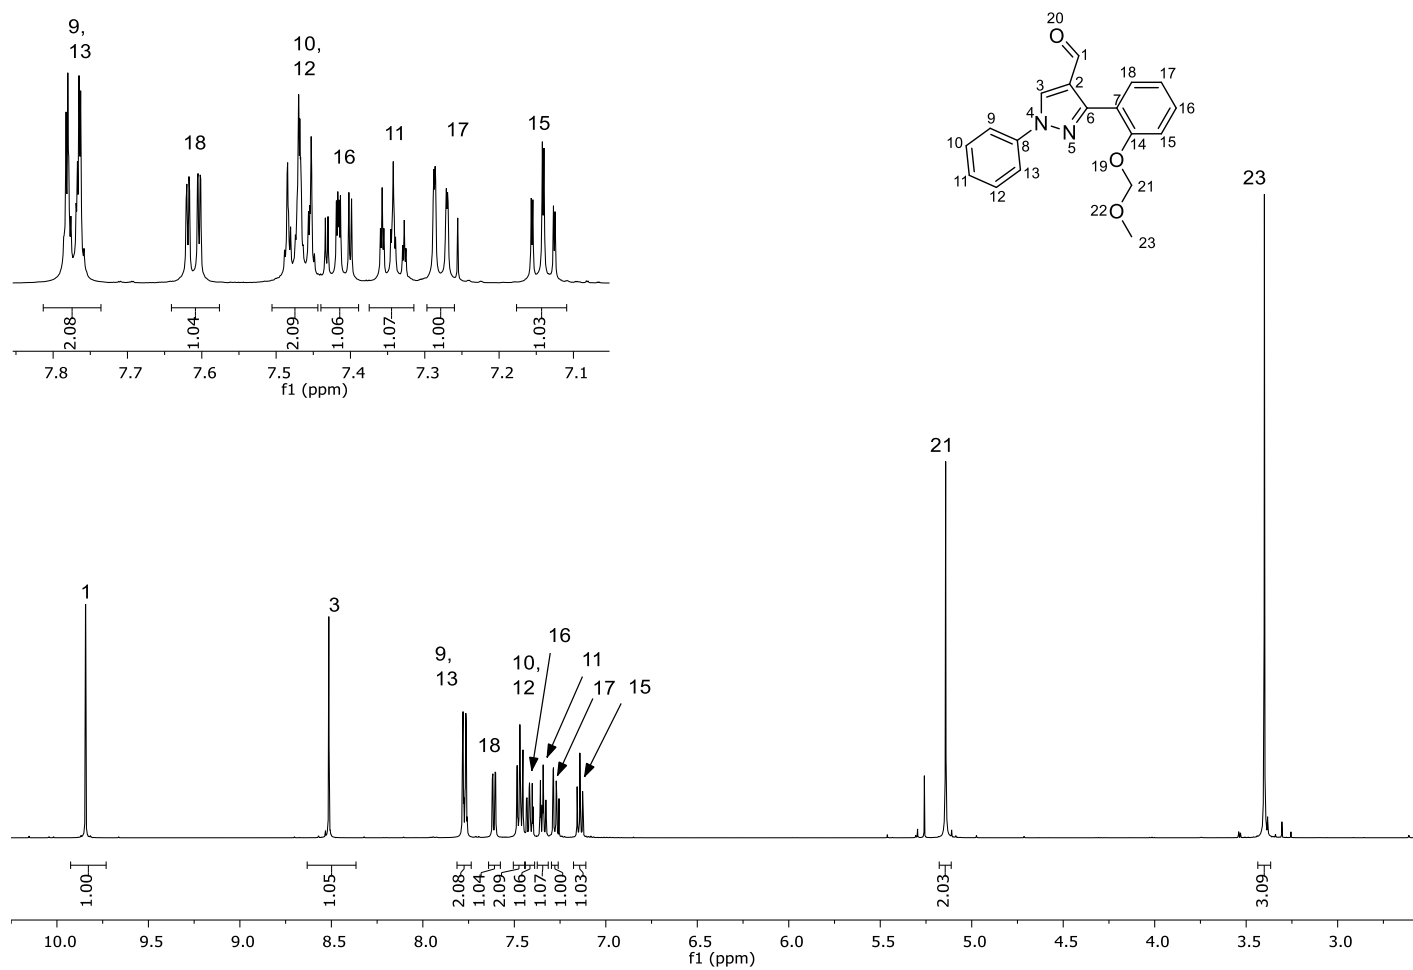

**Figure S6.** <sup>1</sup>H NMR spectrum of 3-(2-(Methoxymethyl)phenyl)-1-phenyl-1H-pyrazole-4-carbaldehyde (**1**) in CDCl<sub>3</sub> at 500 MHz.



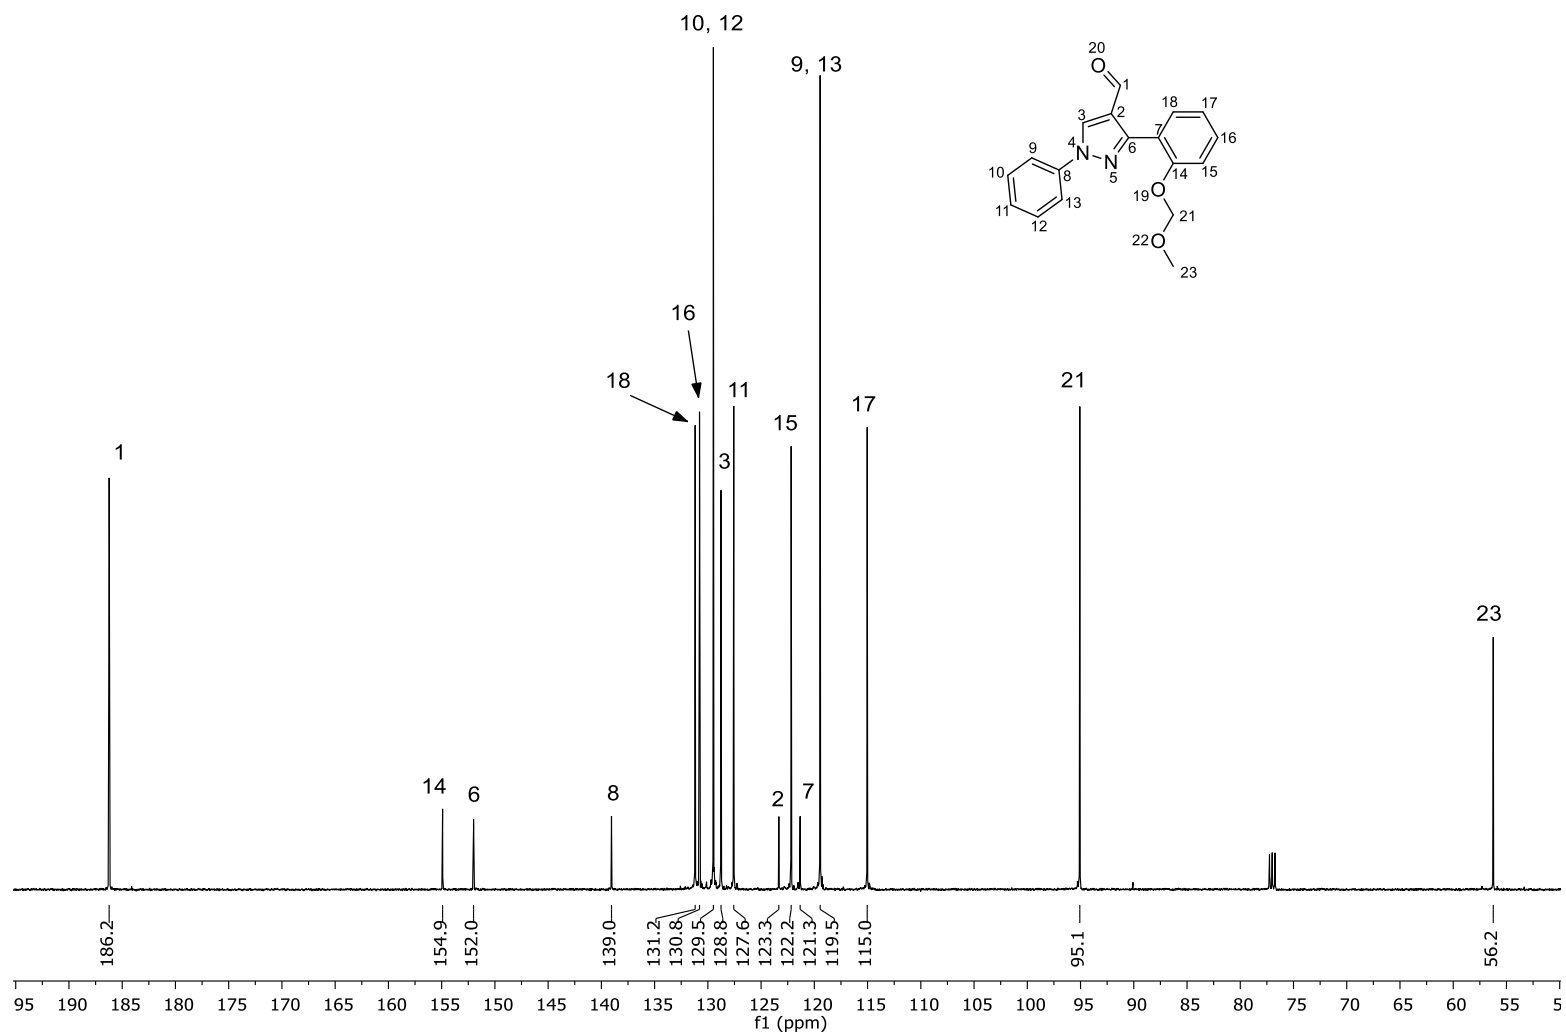

**Figure S7.** <sup>13</sup>C NMR spectrum of 3-(2-(Methoxymethyl)phenyl)-1-phenyl-1H-pyrazole-4-carbaldehyde (**1**) in CDCl<sub>3</sub> at 126 MHz.

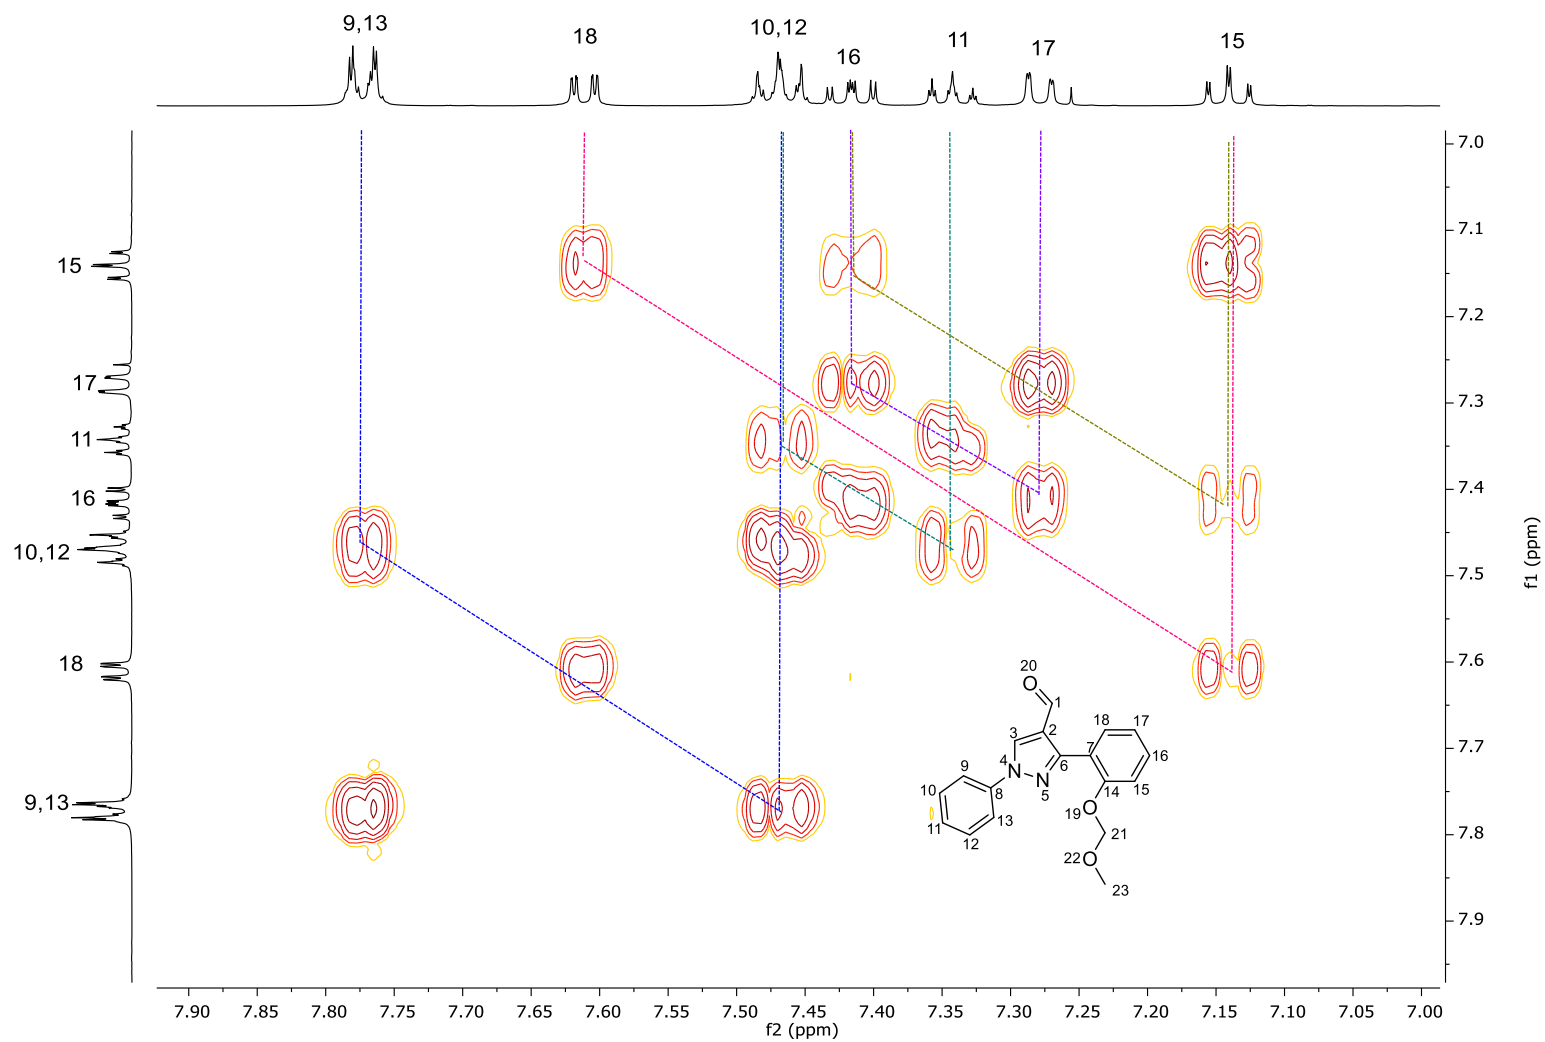

**Figure S8.** 2D NMR (COSY) spectrum of 3-(2-(Methoxymethyl)phenyl)-1-phenyl-1H-pyrazole-4-carbaldehyde (**1**).

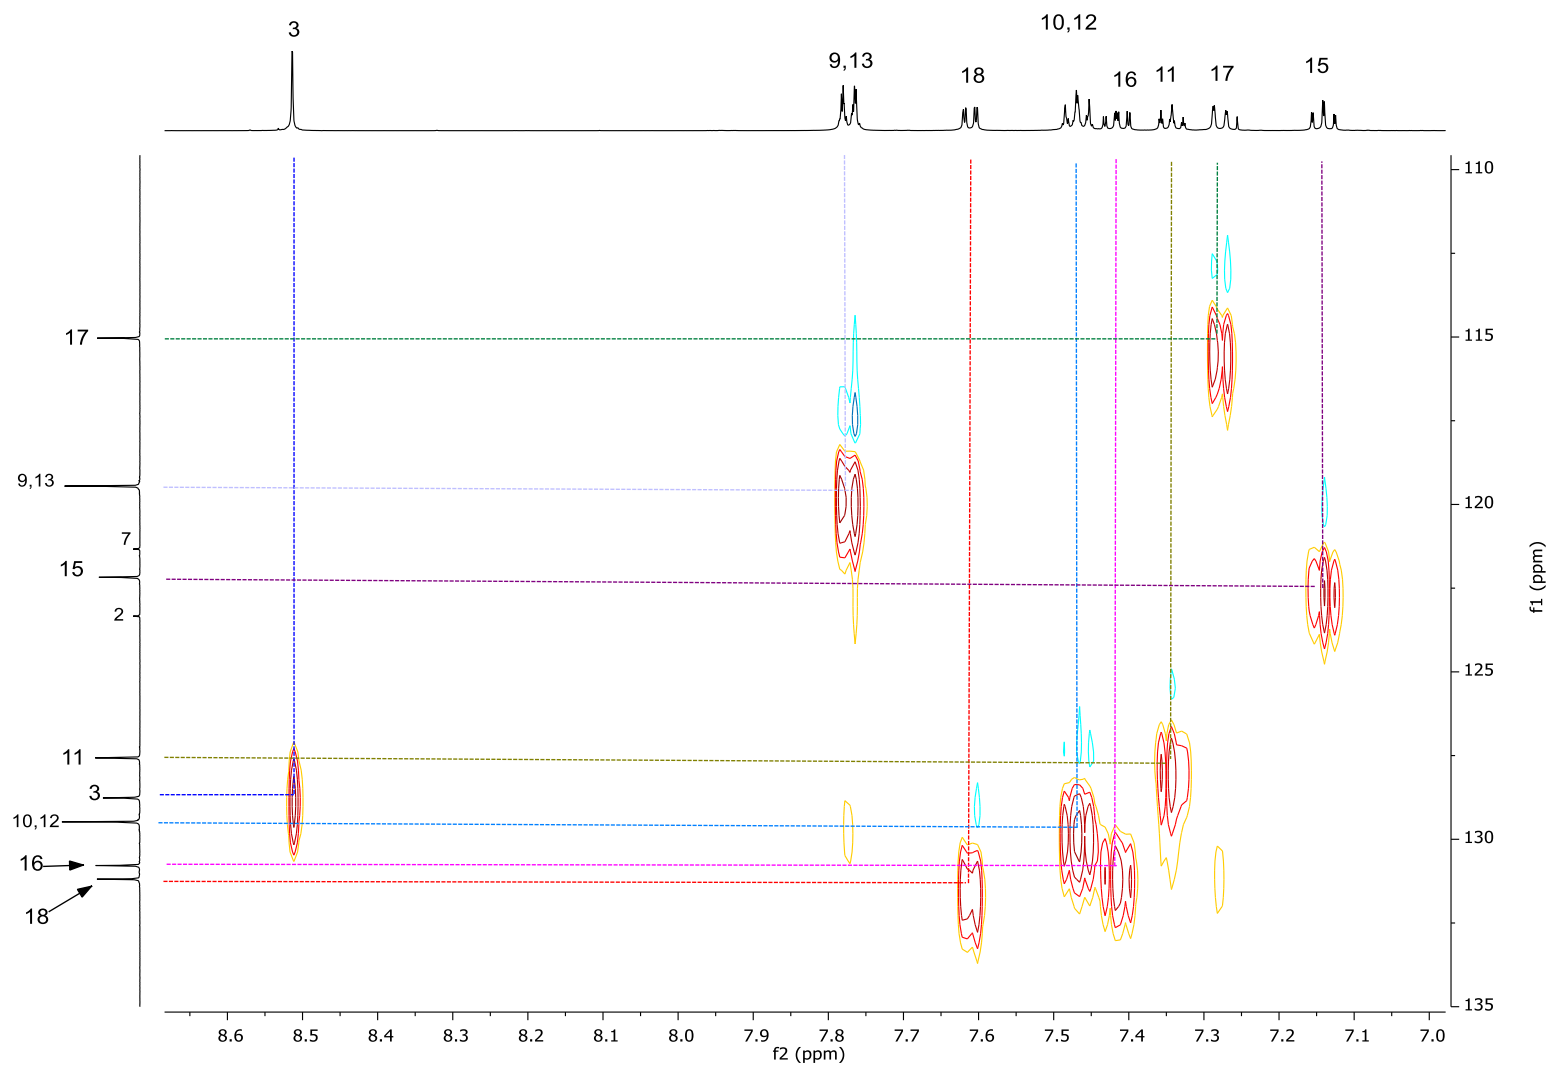

**Figure S9.** 2D NMR (HSQC) spectrum of 3-(2-(Methoxymethyl)phenyl)-1-phenyl-1H-pyrazole-4-carbaldehyde (**1**).

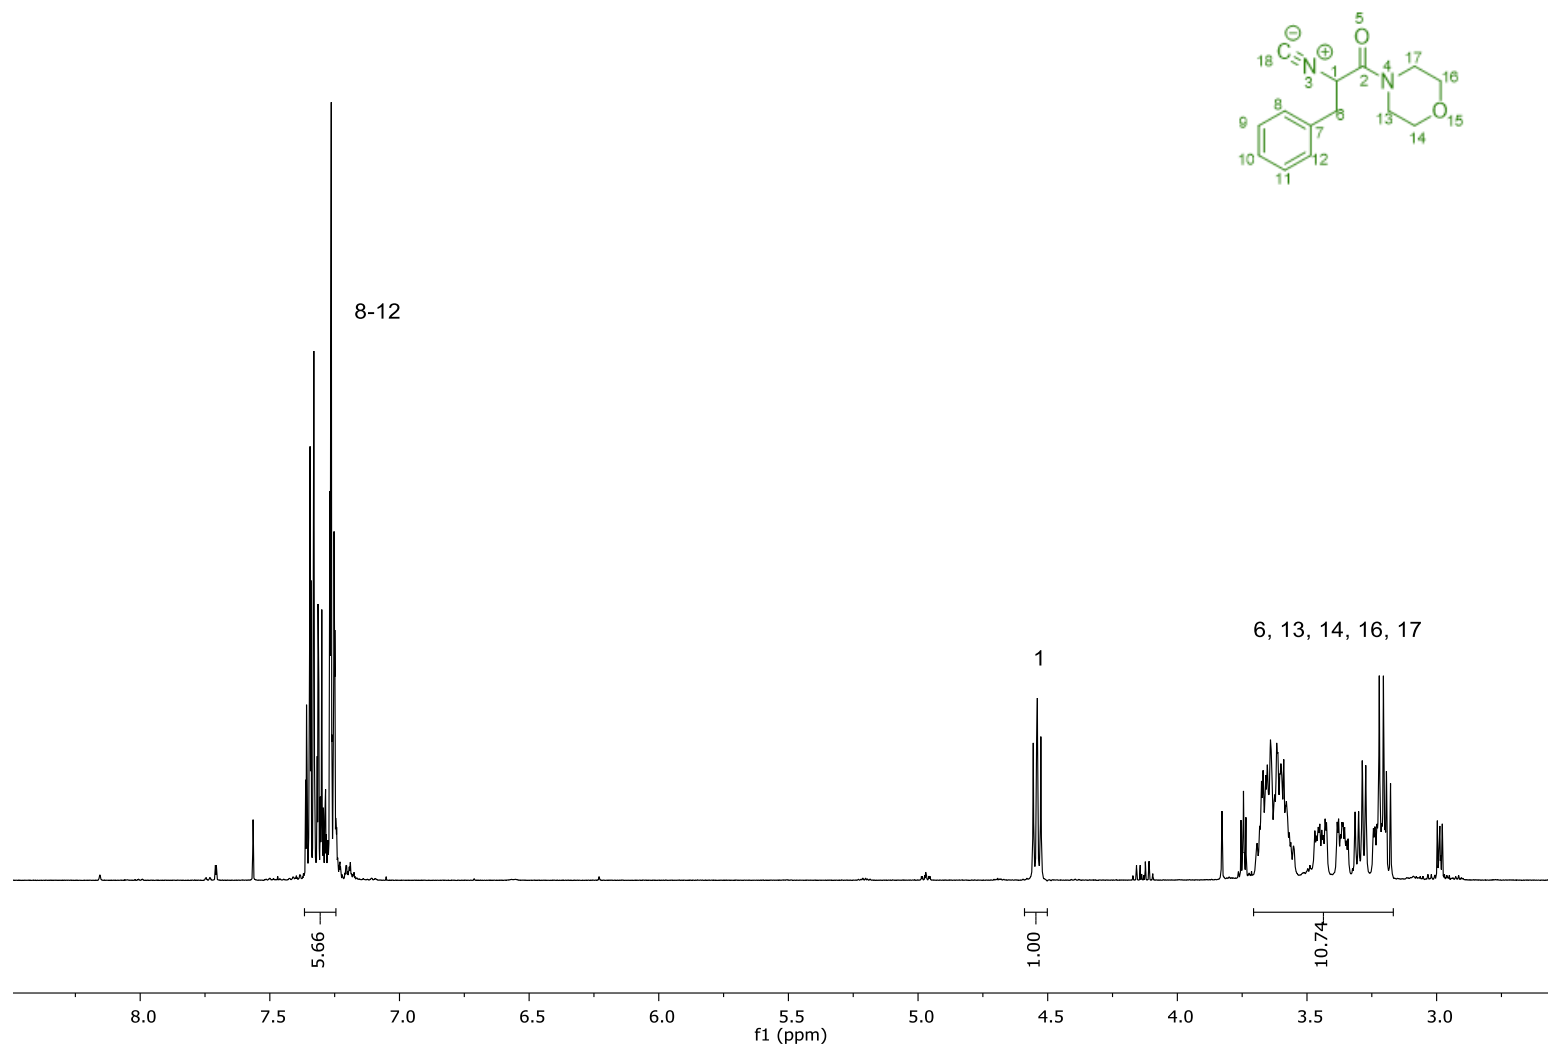

**Figure S10.** <sup>1</sup>H NMR spectrum of 2-Isocyano-1-morpholino-3-phenylpropan-1-one (**3**) in CDCl<sub>3</sub> at 500 MHz.

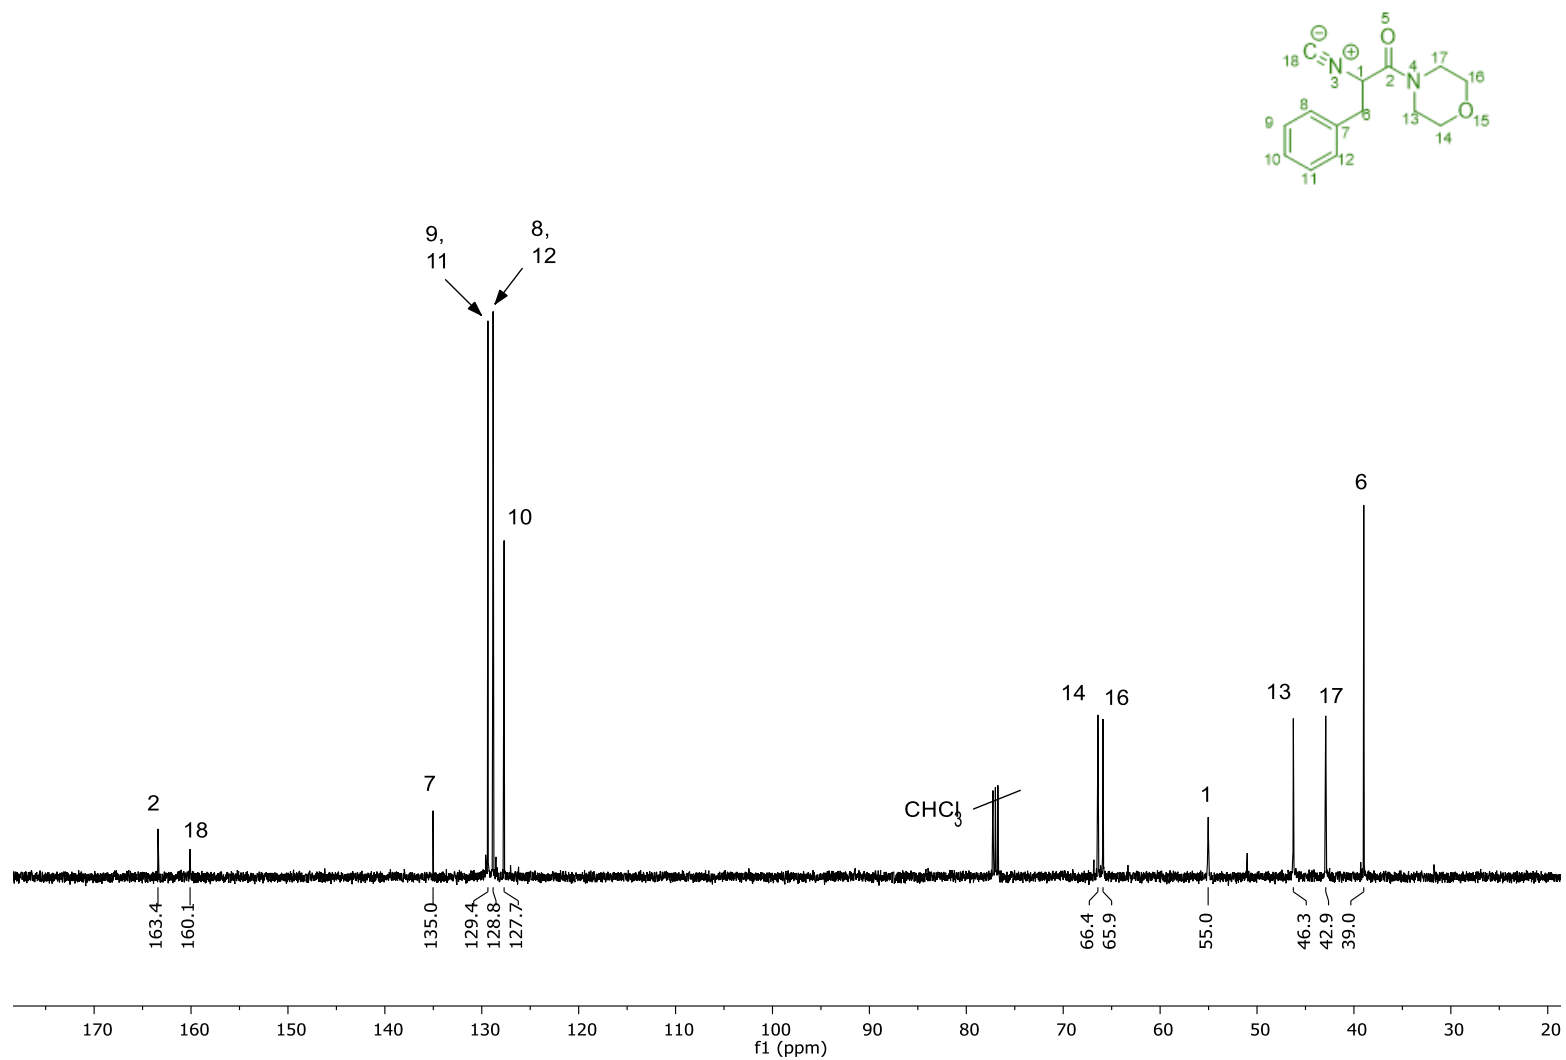

**Figure S11.**  $^{13}\text{C}$  NMR spectrum of 2-isocyano-1-morpholino-3-phenylpropan-1-one (3) in  $\text{CDCl}_3$  at 126 MHz.

2,6-Dibenzyl-7-(3-(2-hydroxyphenyl)-1-phenyl-1*H*-pyrazol-4-yl)-3-morpholino-6,7-dihydro-5*H*-pyrrolo[3,4-*b*]pyridin-5-one (**6a**).

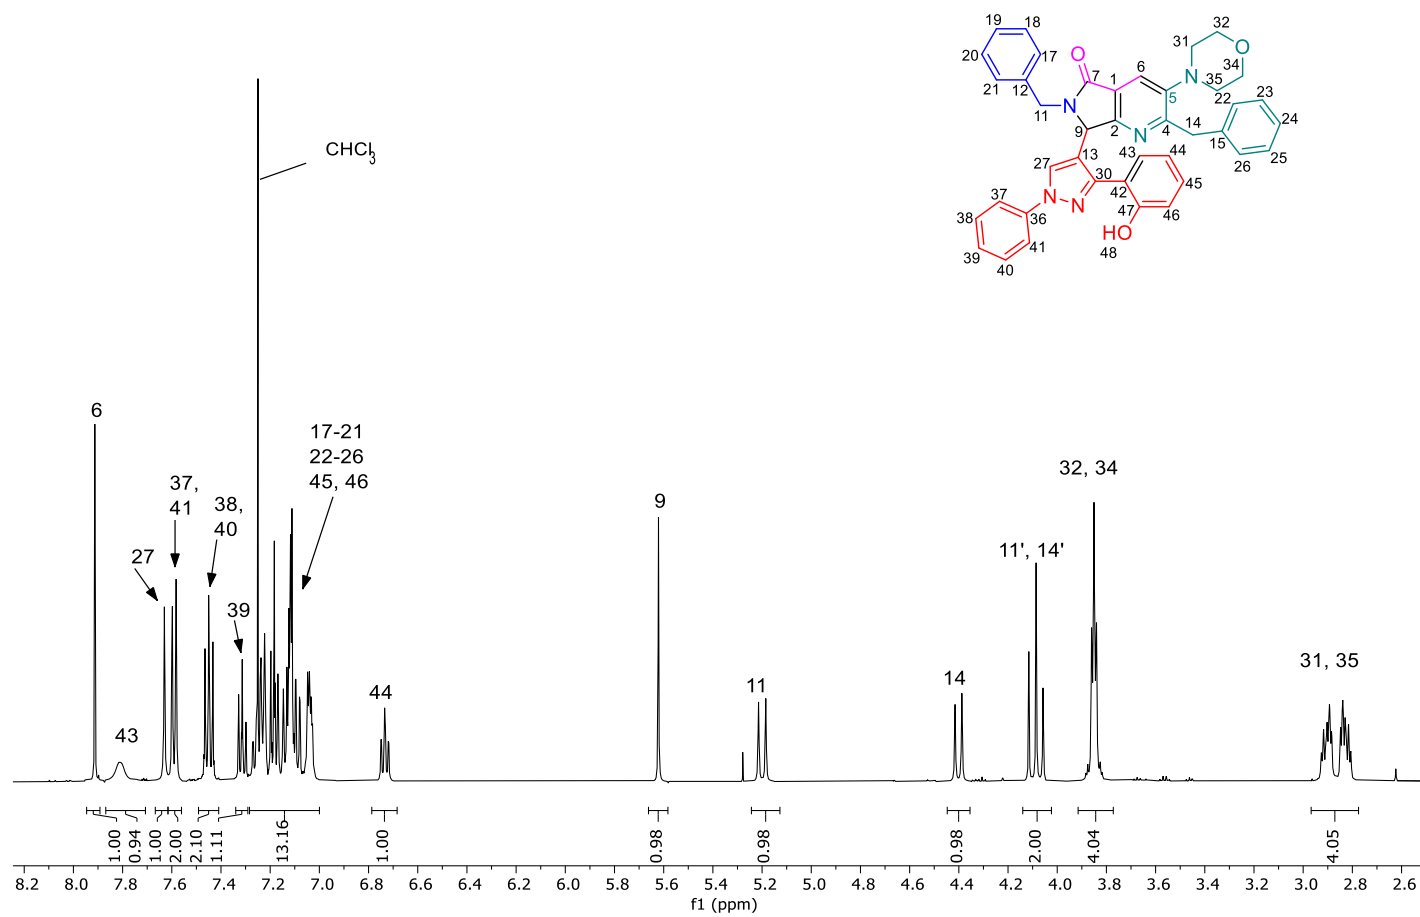

**Figure S12.** <sup>1</sup>H NMR of compound **6a** in CDCl<sub>3</sub> at 500 MHz.

2,6-Dibenzyl-7-(3-(2-hydroxyphenyl)-1-phenyl-1*H*-pyrazol-4-yl)-3-morpholino-6,7-dihydro-5*H*-pyrrolo[3,4-*b*]pyridin-5-one (**6a**).

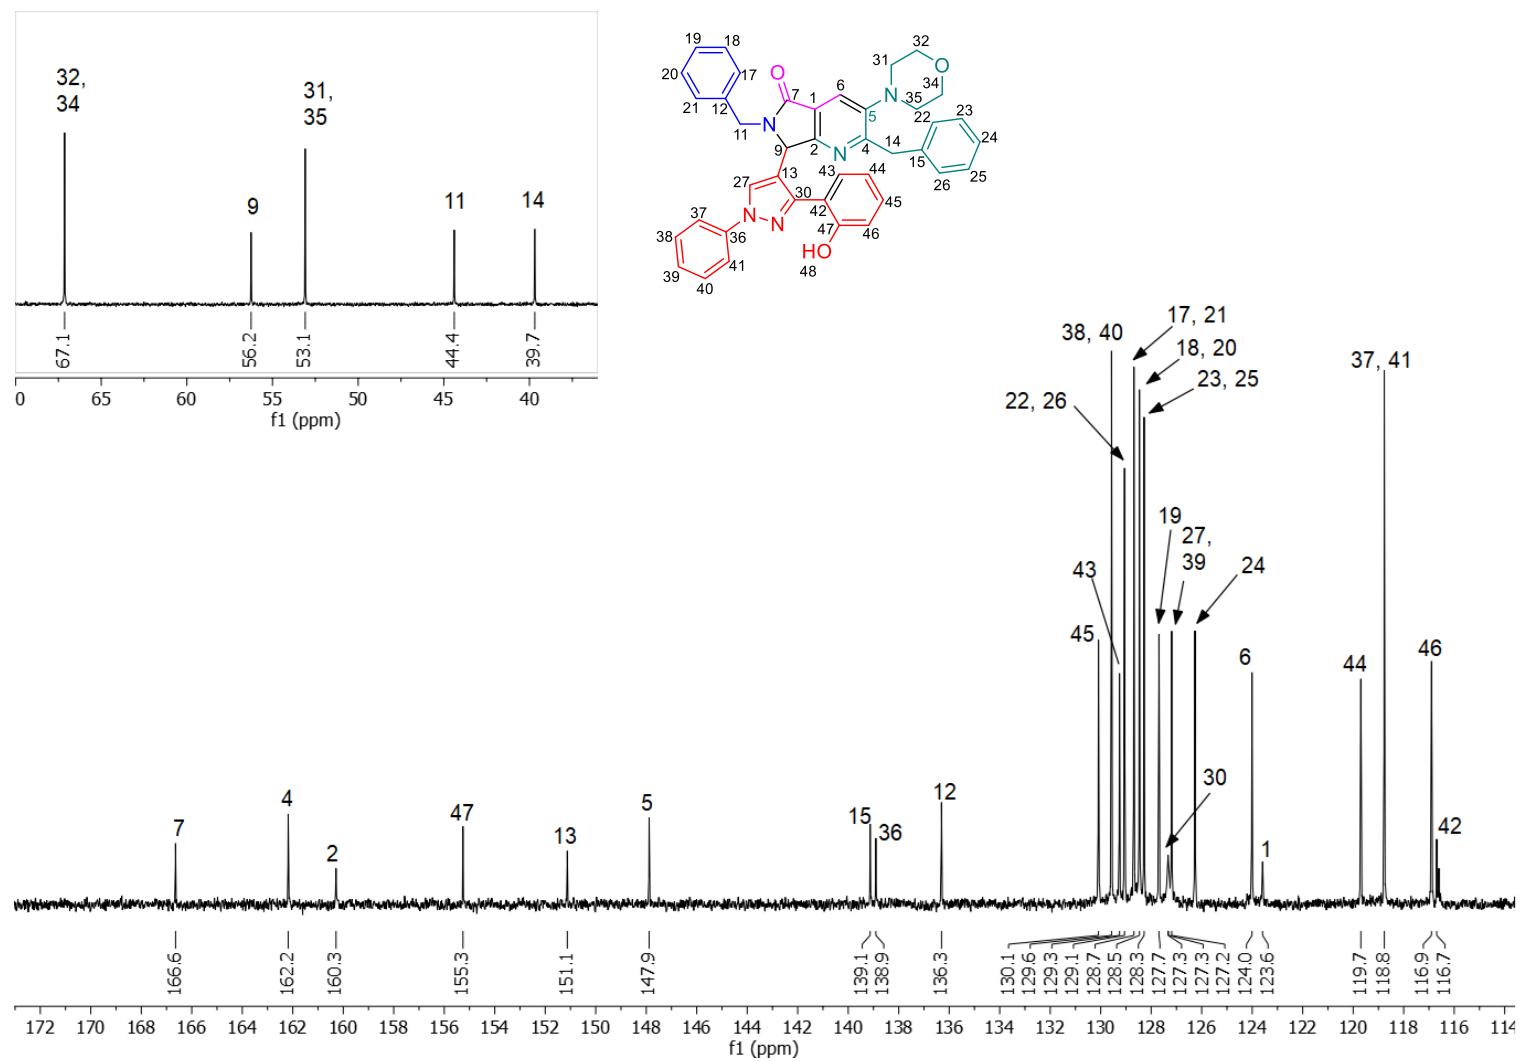

Figure S13. <sup>13</sup>C NMR of compound **6a** in CDCl<sub>3</sub> at 126 MHz.

2,6-Dibenzyl-7-(3-(2-hydroxyphenyl)-1-phenyl-1*H*-pyrazol-4-yl)-3-morpholino-6,7-dihydro-5*H*-pyrrolo[3,4-*b*]pyridin-5-one (**6a**).

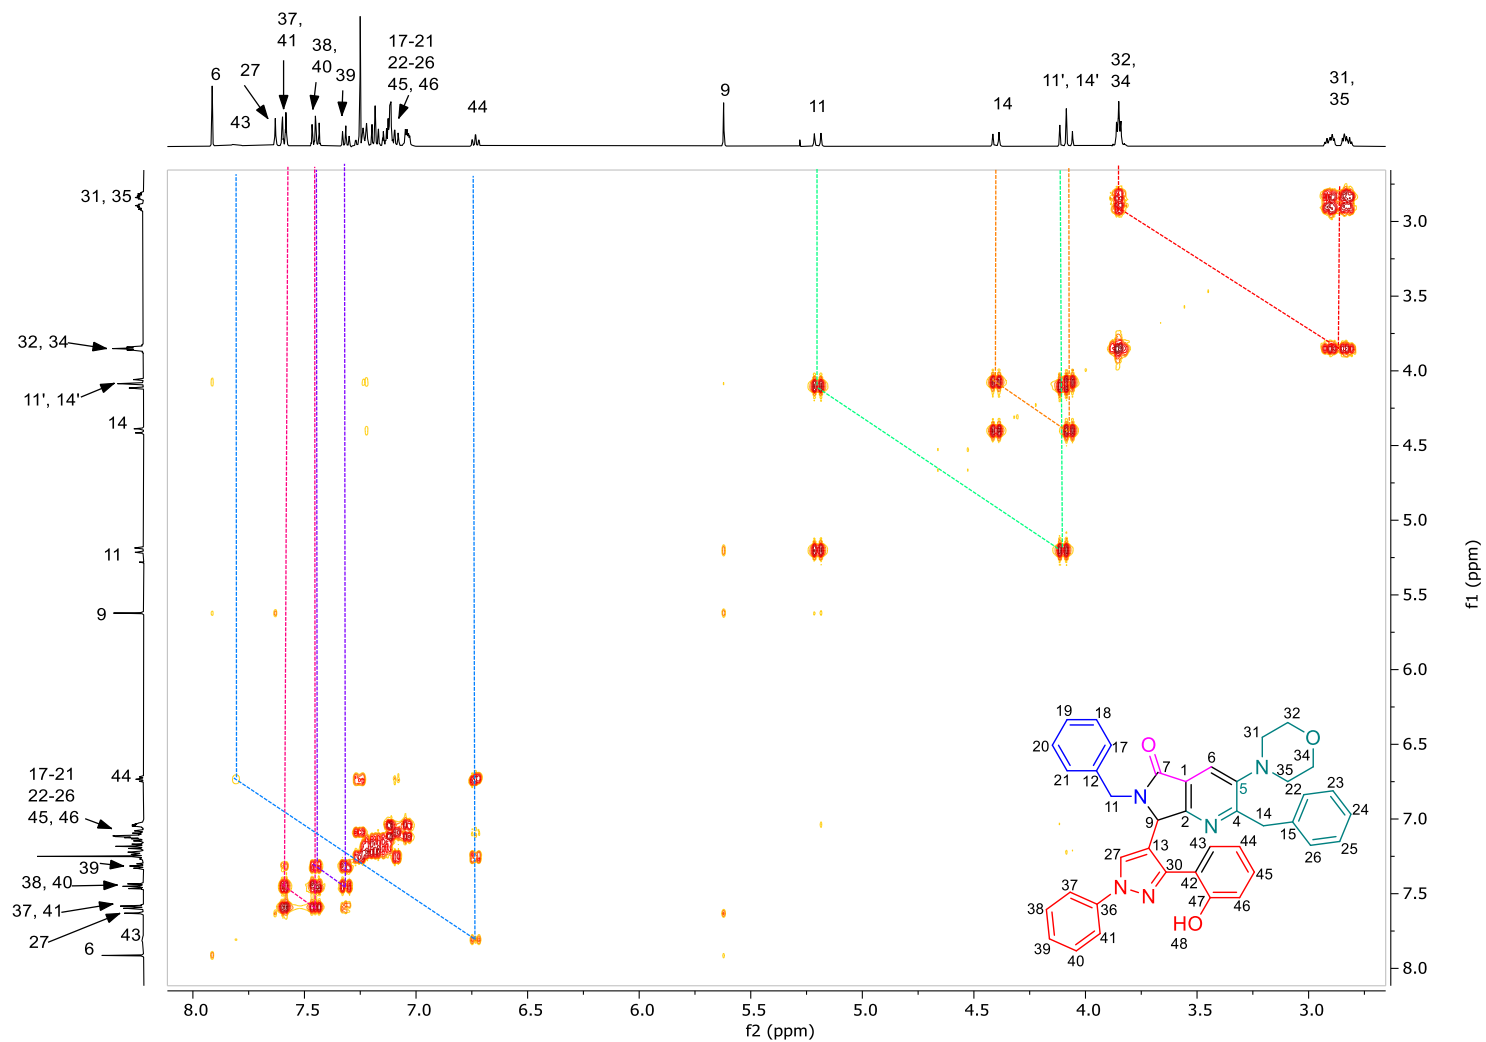

Figure S14. 2D NMR (COSY) Spectrum of compound **6a**.



2,6-Dibenzyl-7-(3-(2-hydroxyphenyl)-1-phenyl-1*H*-pyrazol-4-yl)-3-morpholino-6,7-dihydro-5*H*-pyrrolo[3,4-*b*]pyridin-5-one (**6a**).

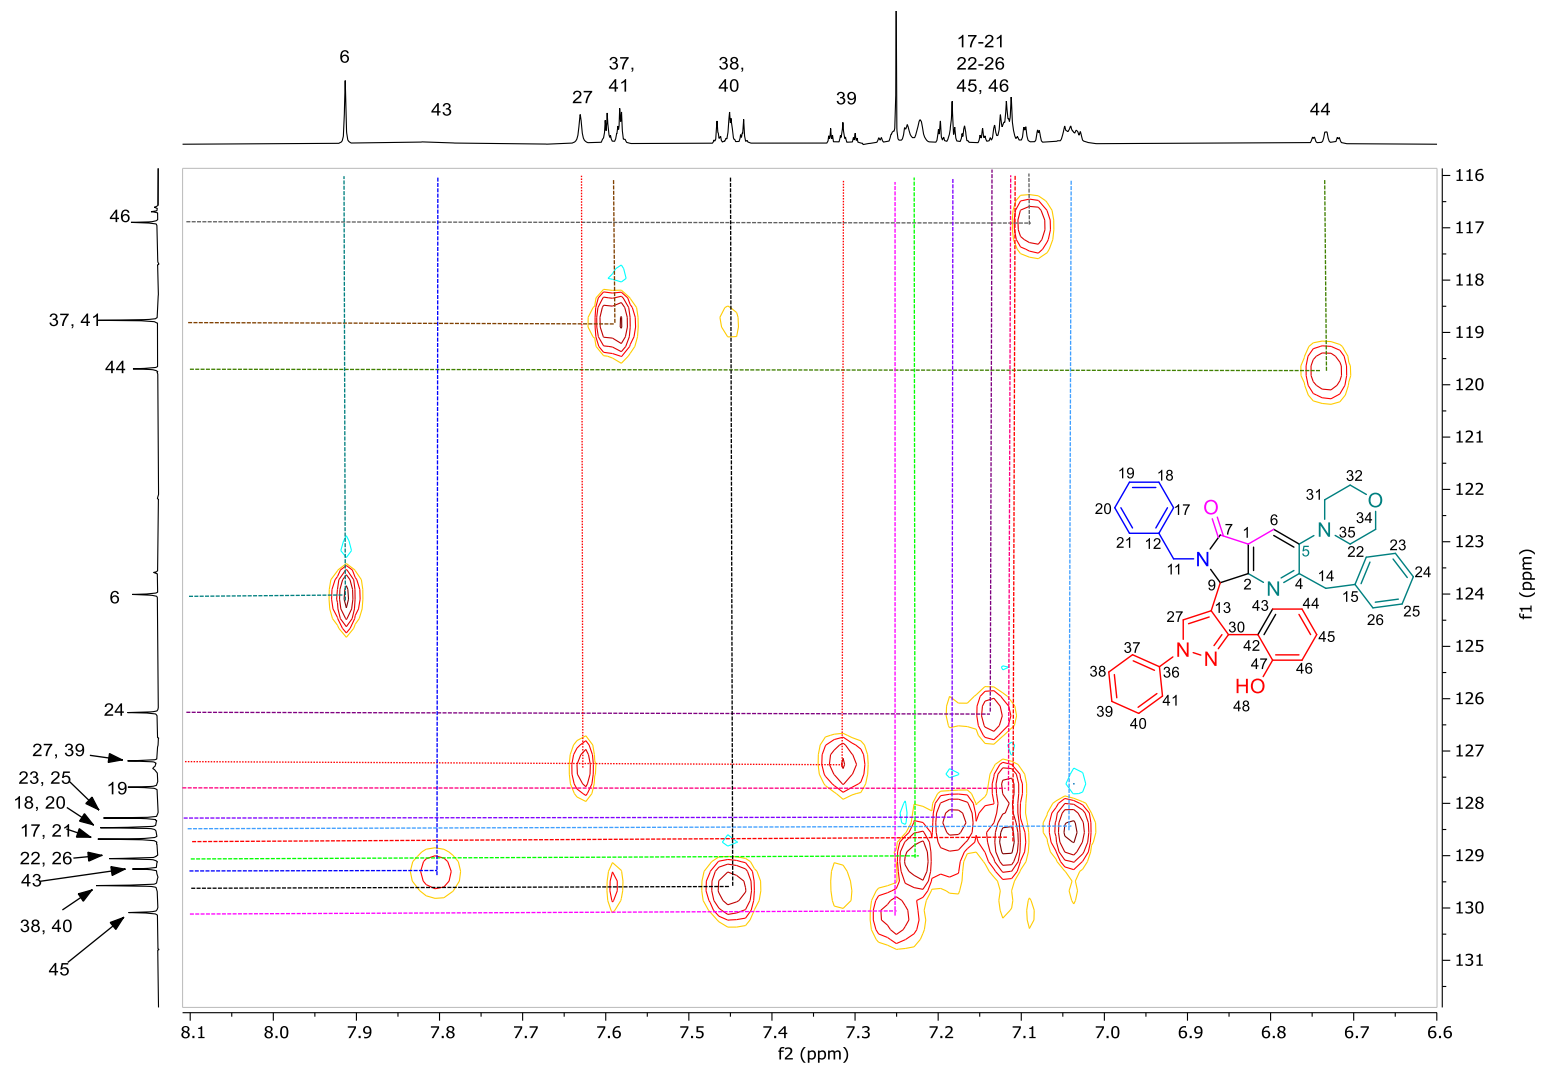

**Figure S15.** 2D NMR (HSQC) Spectrum of the aromatic region of compound **6a**.

2,6-Dibenzyl-7-(3-(2-hydroxyphenyl)-1-phenyl-1*H*-pyrazol-4-yl)-3-morpholino-6,7-dihydro-5*H*-pyrrolo[3,4-*b*]pyridin-5-one (**6a**).

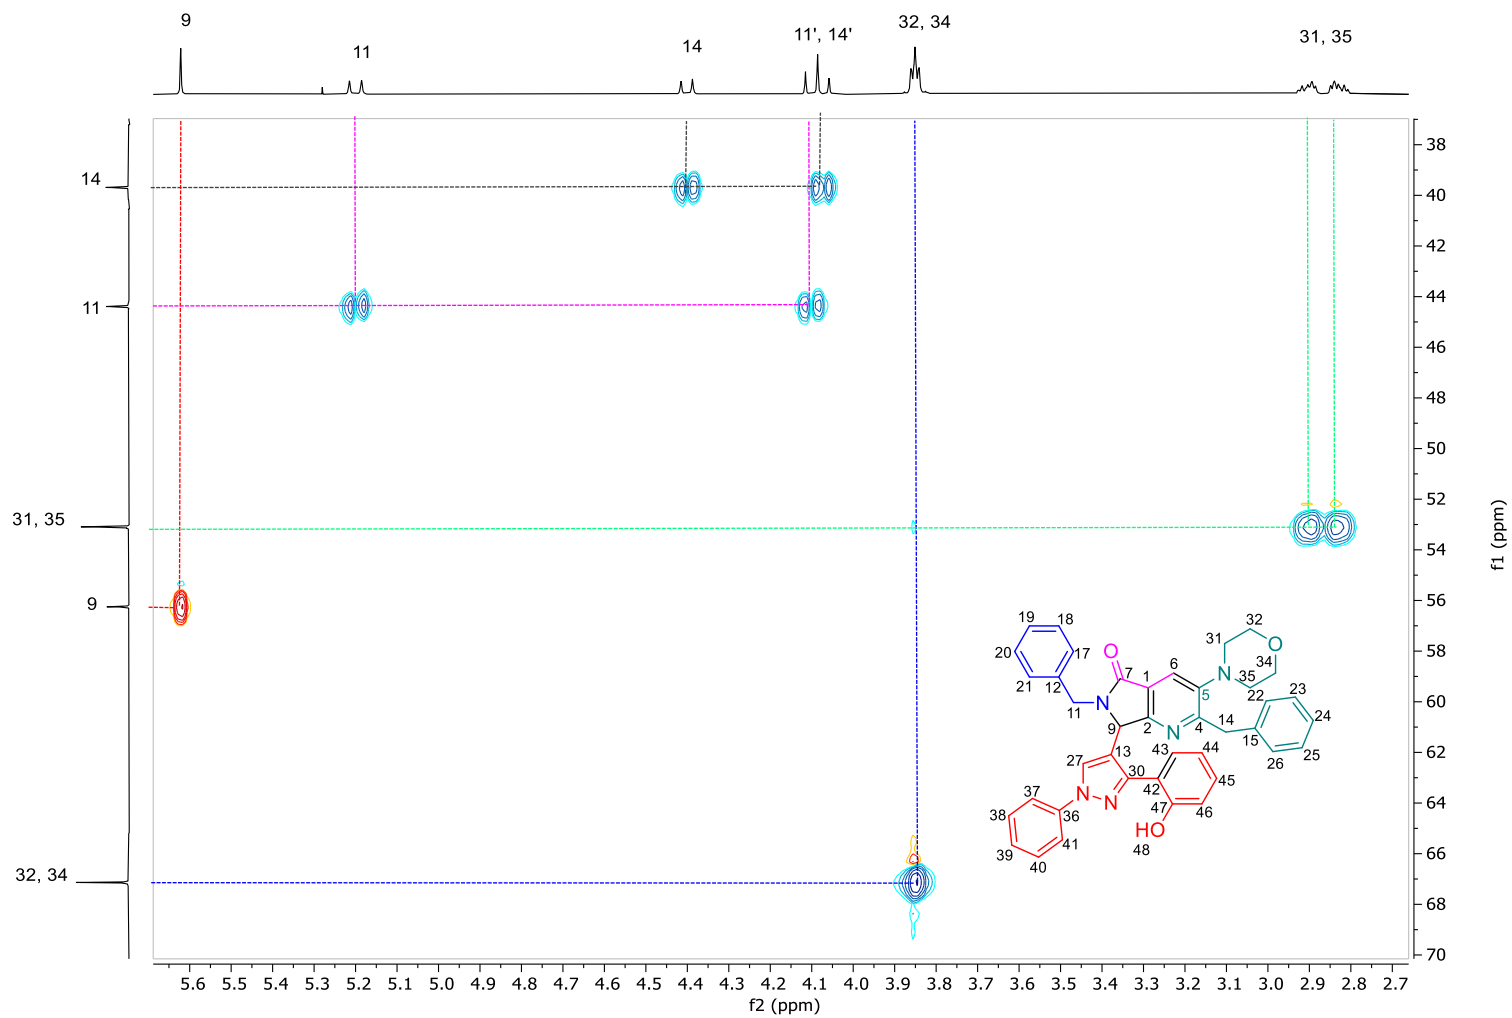

**Figure S16.** 2D NMR (HSQC) Spectrum of the aliphatic region of compound **6a**.

2,6-Dibenzyl-7-(3-(2-hydroxyphenyl)-1-phenyl-1*H*-pyrazol-4-yl)-3-morpholino-6,7-dihydro-5*H*-pyrrolo[3,4-*b*]pyridin-5-one (**6a**).

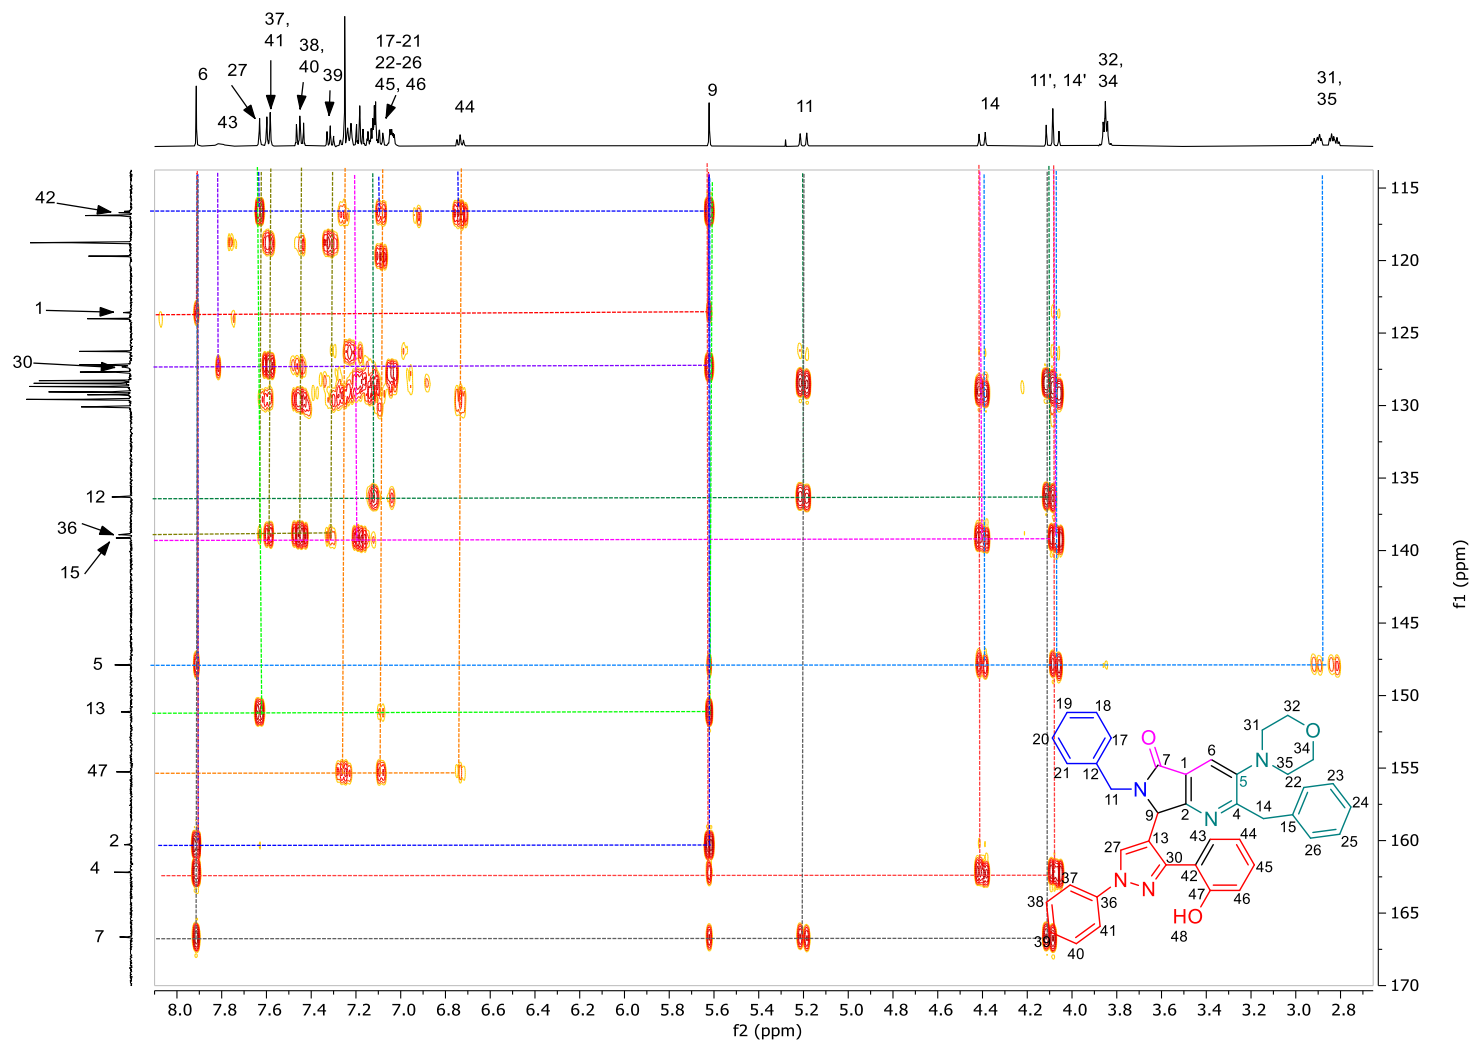

Figure S17. 2D NMR (HMBC) Spectrum of compound **6a**.

2-Benzyl-6-butyl-7-(3-(2-hydroxyphenyl)-1-phenyl-1*H*-pyrazol-4-yl)-3-morpholino-6,7-dihydro-5*H*-pyrrolo[3,4-*b*]pyridin-5-one (**6b**).

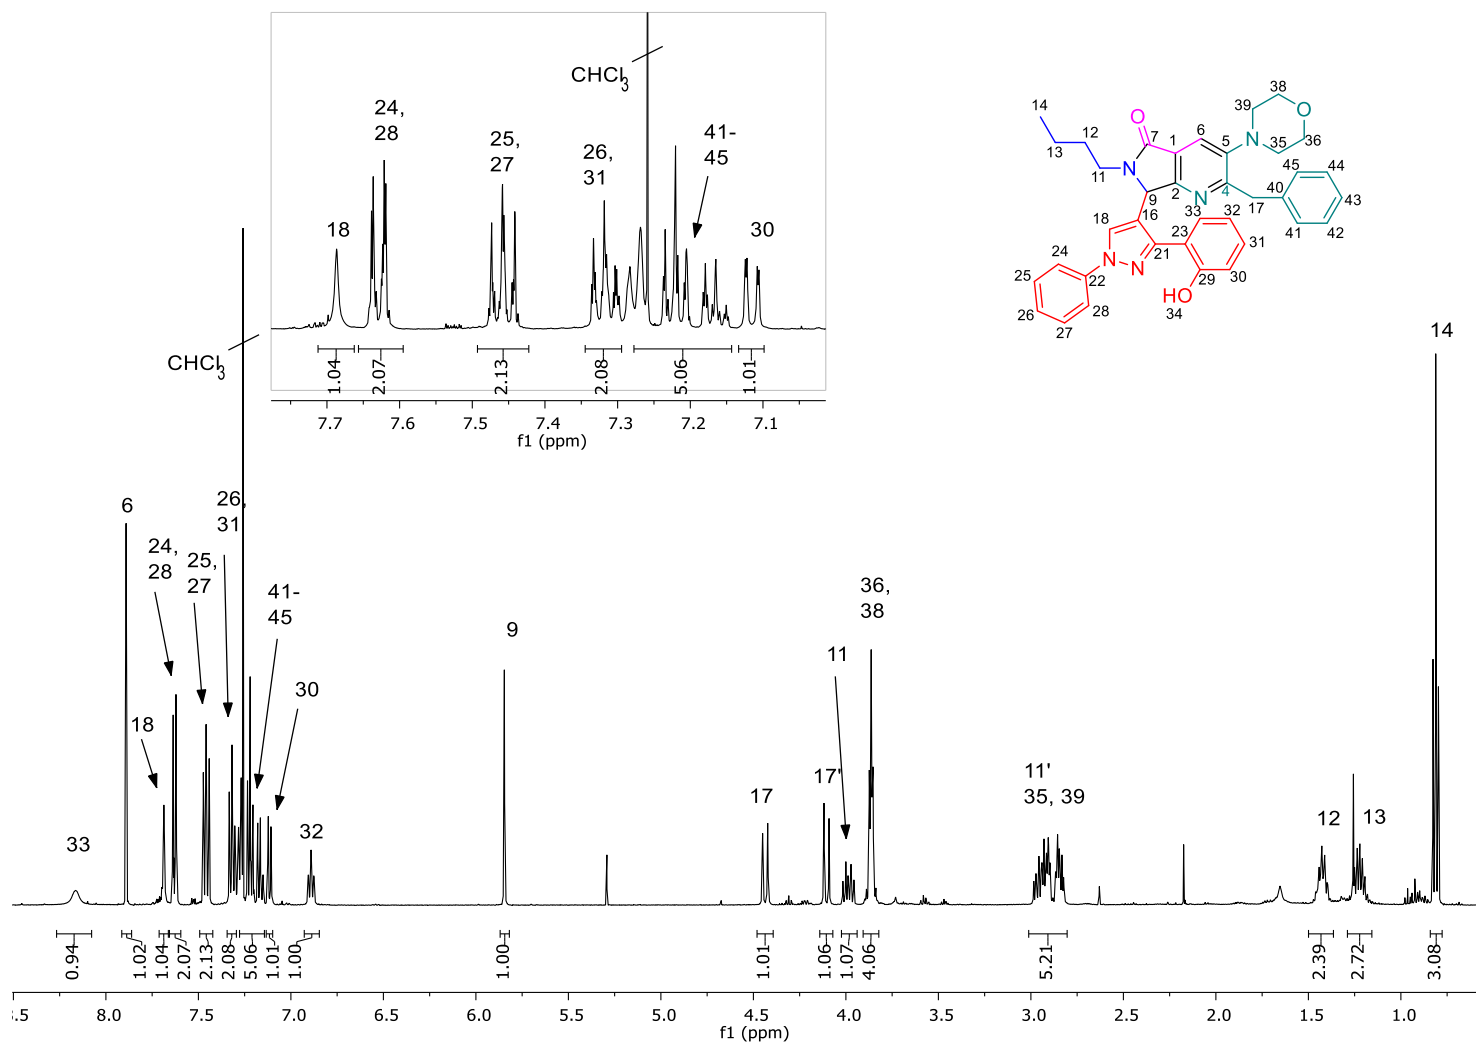

Figure S18. <sup>1</sup>H NMR of compound **6b** in CDCl<sub>3</sub> at 500 MHz

2-Benzyl-6-butyl-7-(3-(2-hydroxyphenyl)-1-phenyl-1*H*-pyrazol-4-yl)-3-morpholino-6,7-dihydro-5*H*-pyrrolo[3,4-*b*]pyridin-5-one (**6b**).

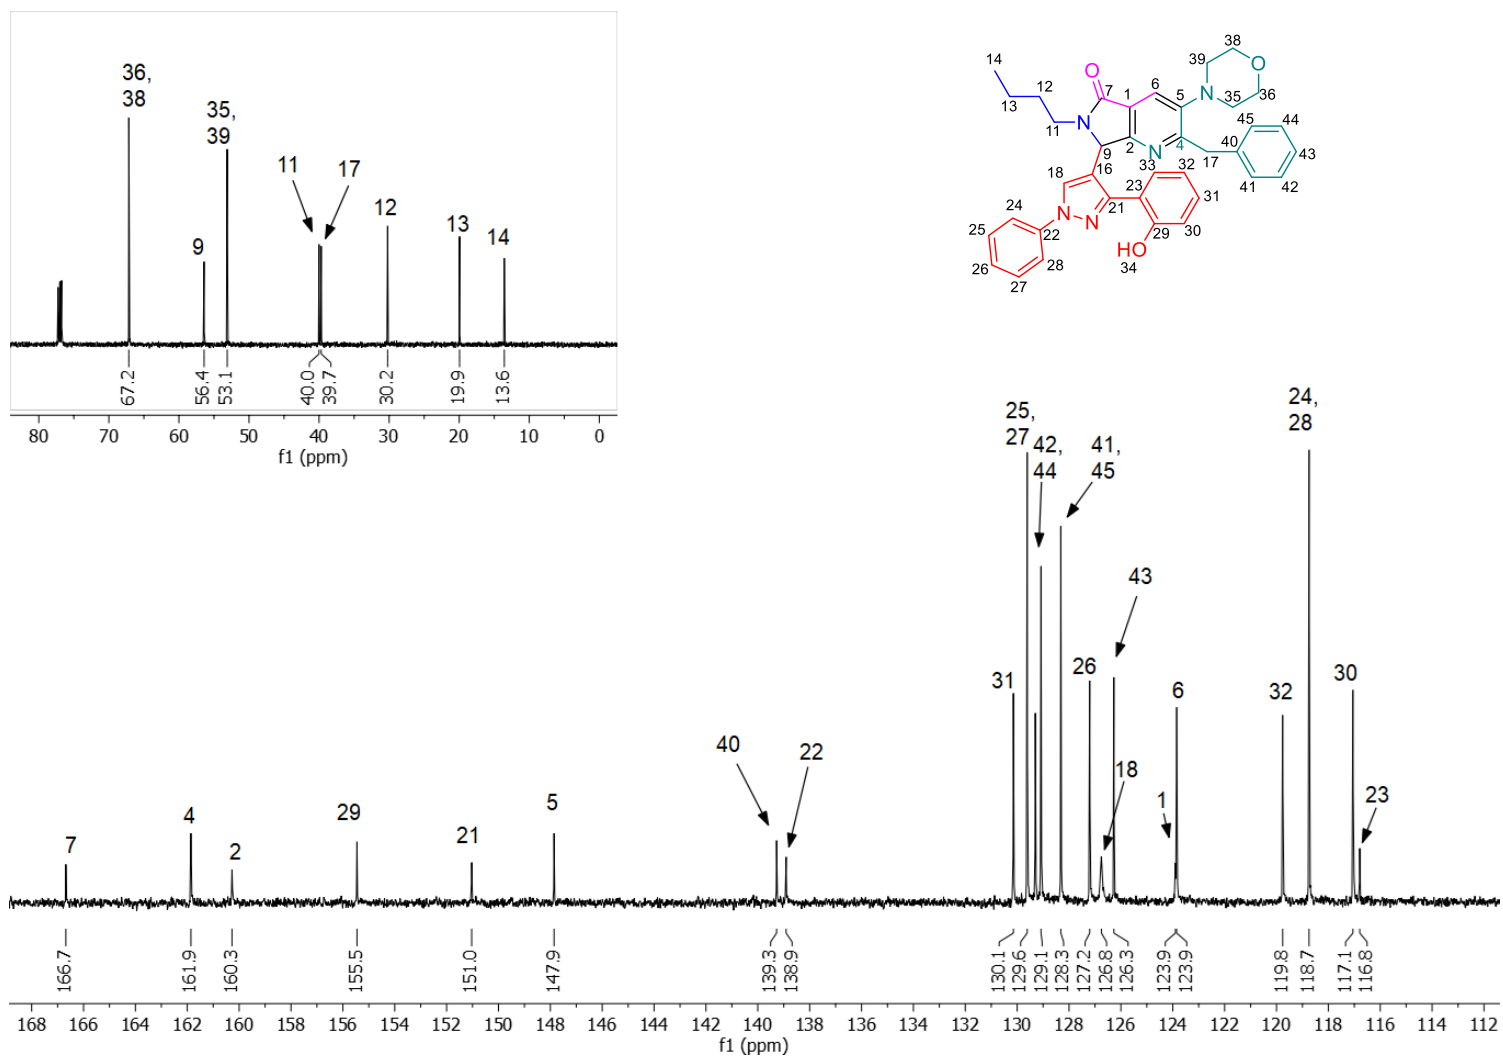

Figure S19. <sup>13</sup>C NMR of compound **6b** in CDCl<sub>3</sub> at 126 MHz.

2-Benzyl-6-butyl-7-(3-(2-hydroxyphenyl)-1-phenyl-1*H*-pyrazol-4-yl)-3-morpholino-6,7-dihydro-5*H*-pyrrolo[3,4-*b*]pyridin-5-one (**6b**).

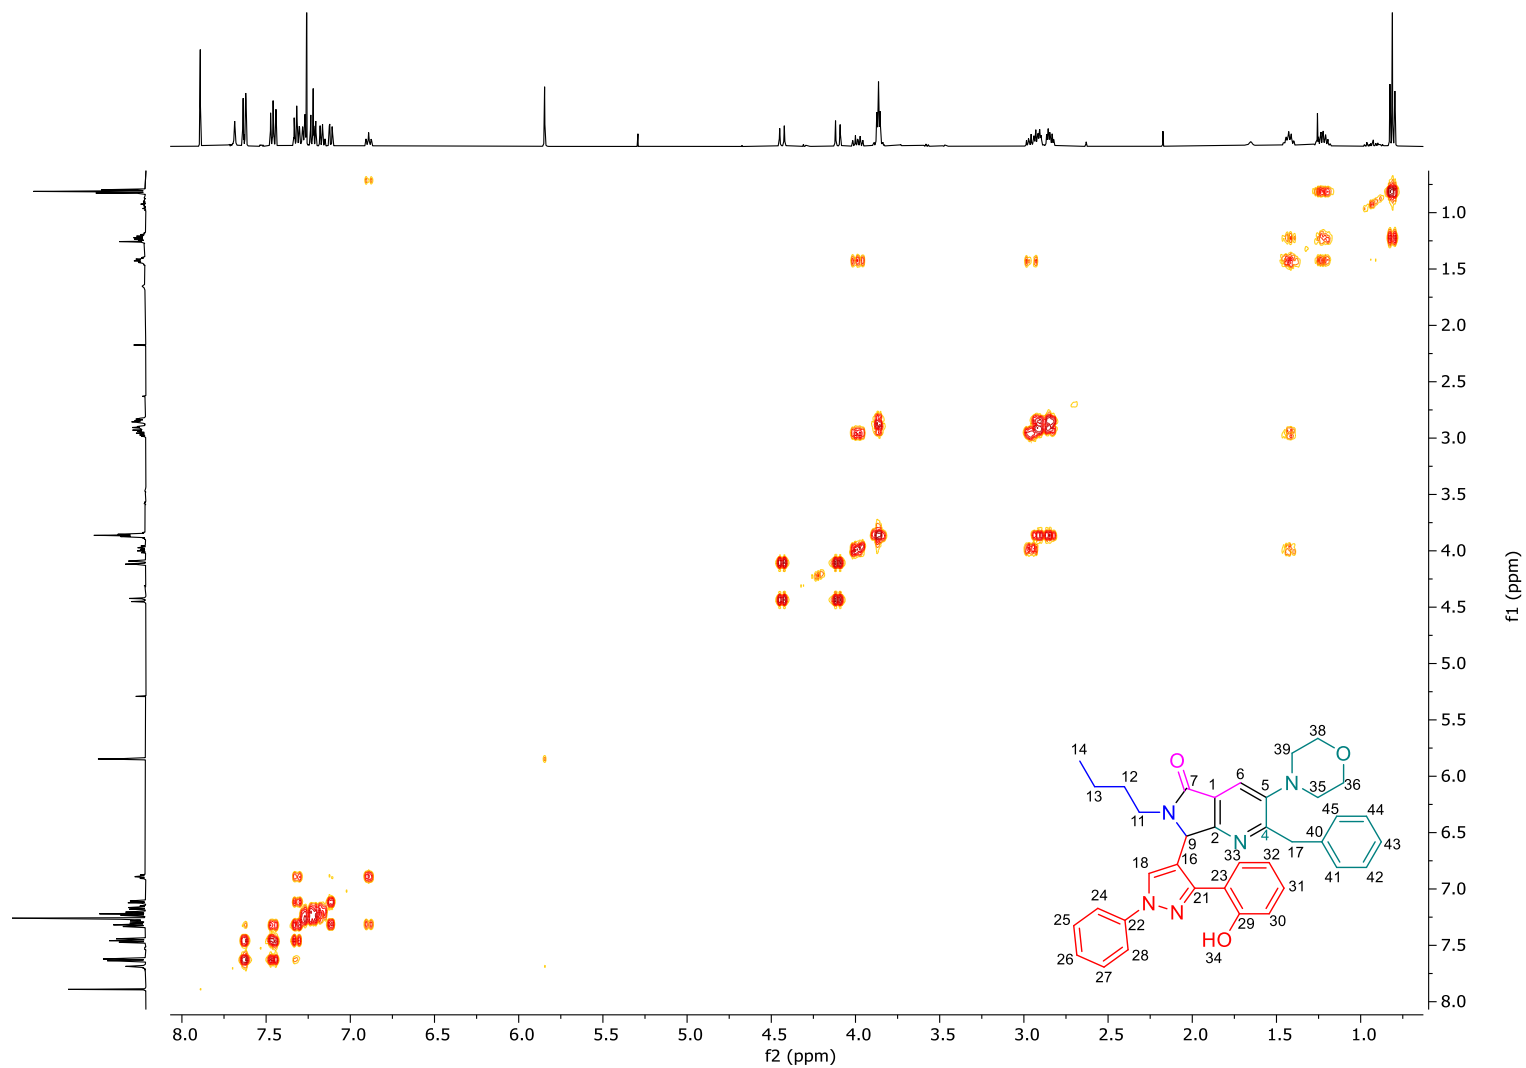

Figure S20. 2D COSY NMR Spectrum of compound **6b**.

2-Benzyl-6-butyl-7-(3-(2-hydroxyphenyl)-1-phenyl-1*H*-pyrazol-4-yl)-3-morpholino-6,7-dihydro-5*H*-pyrrolo[3,4-*b*]pyridin-5-one (**6b**).

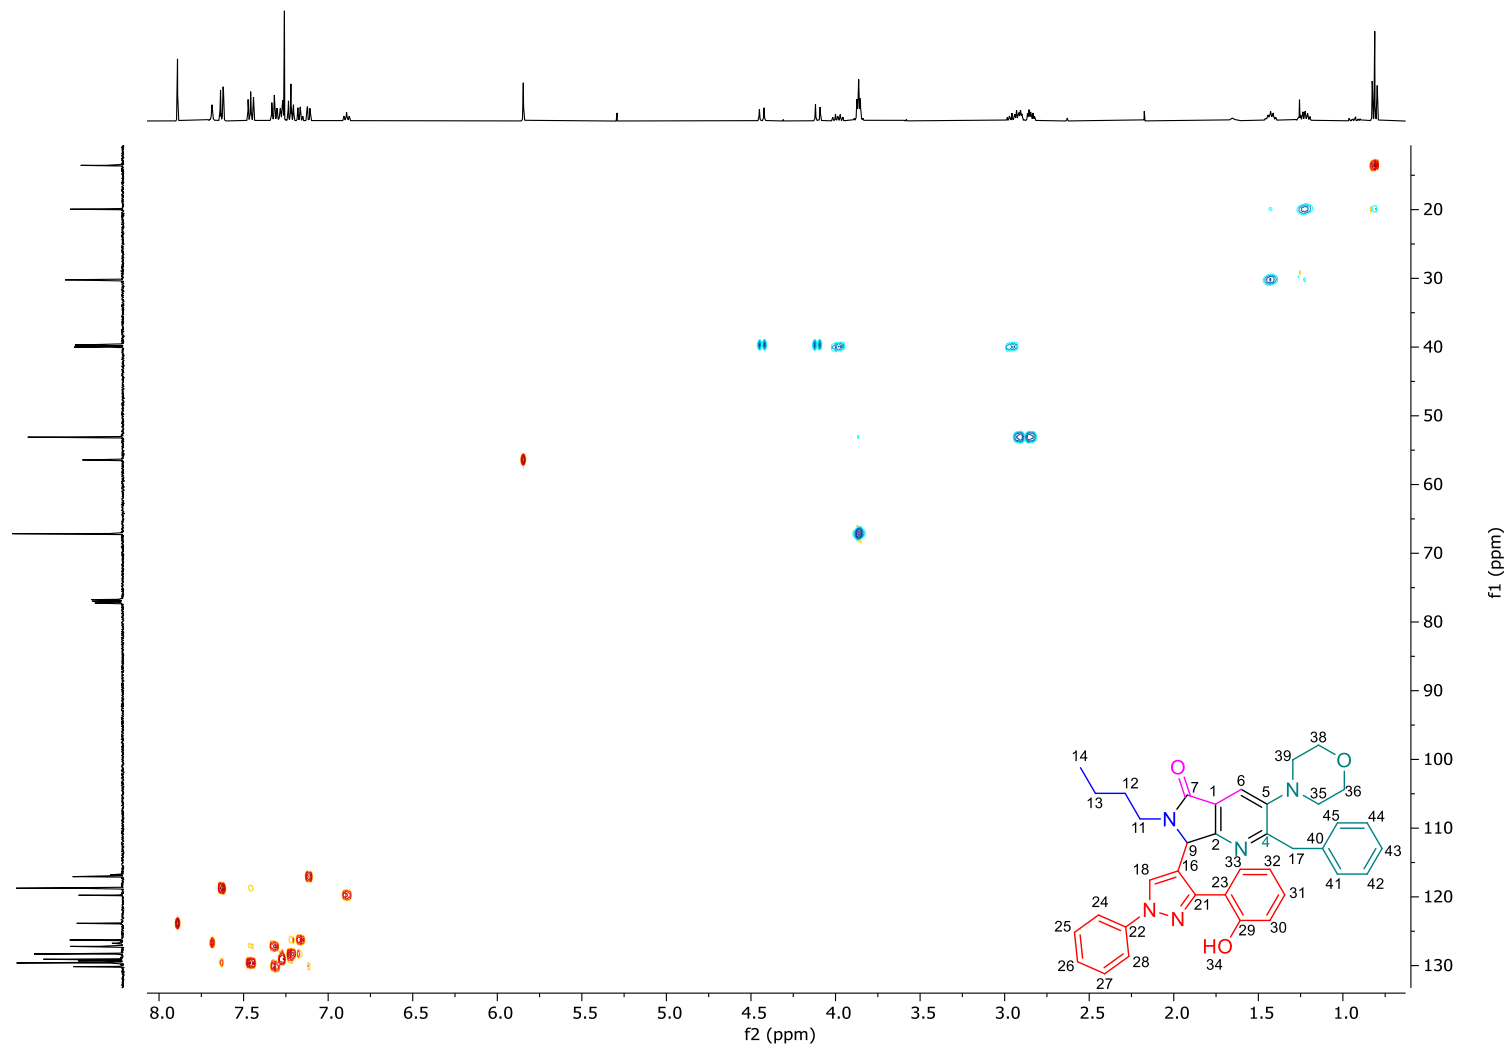

Figure S21. 2D HSQC NMR Spectrum of compound **6b**.

2-Benzyl-6-butyl-7-(3-(2-hydroxyphenyl)-1-phenyl-1*H*-pyrazol-4-yl)-3-morpholino-6,7-dihydro-5*H*-pyrrolo[3,4-*b*]pyridin-5-one (**6b**).

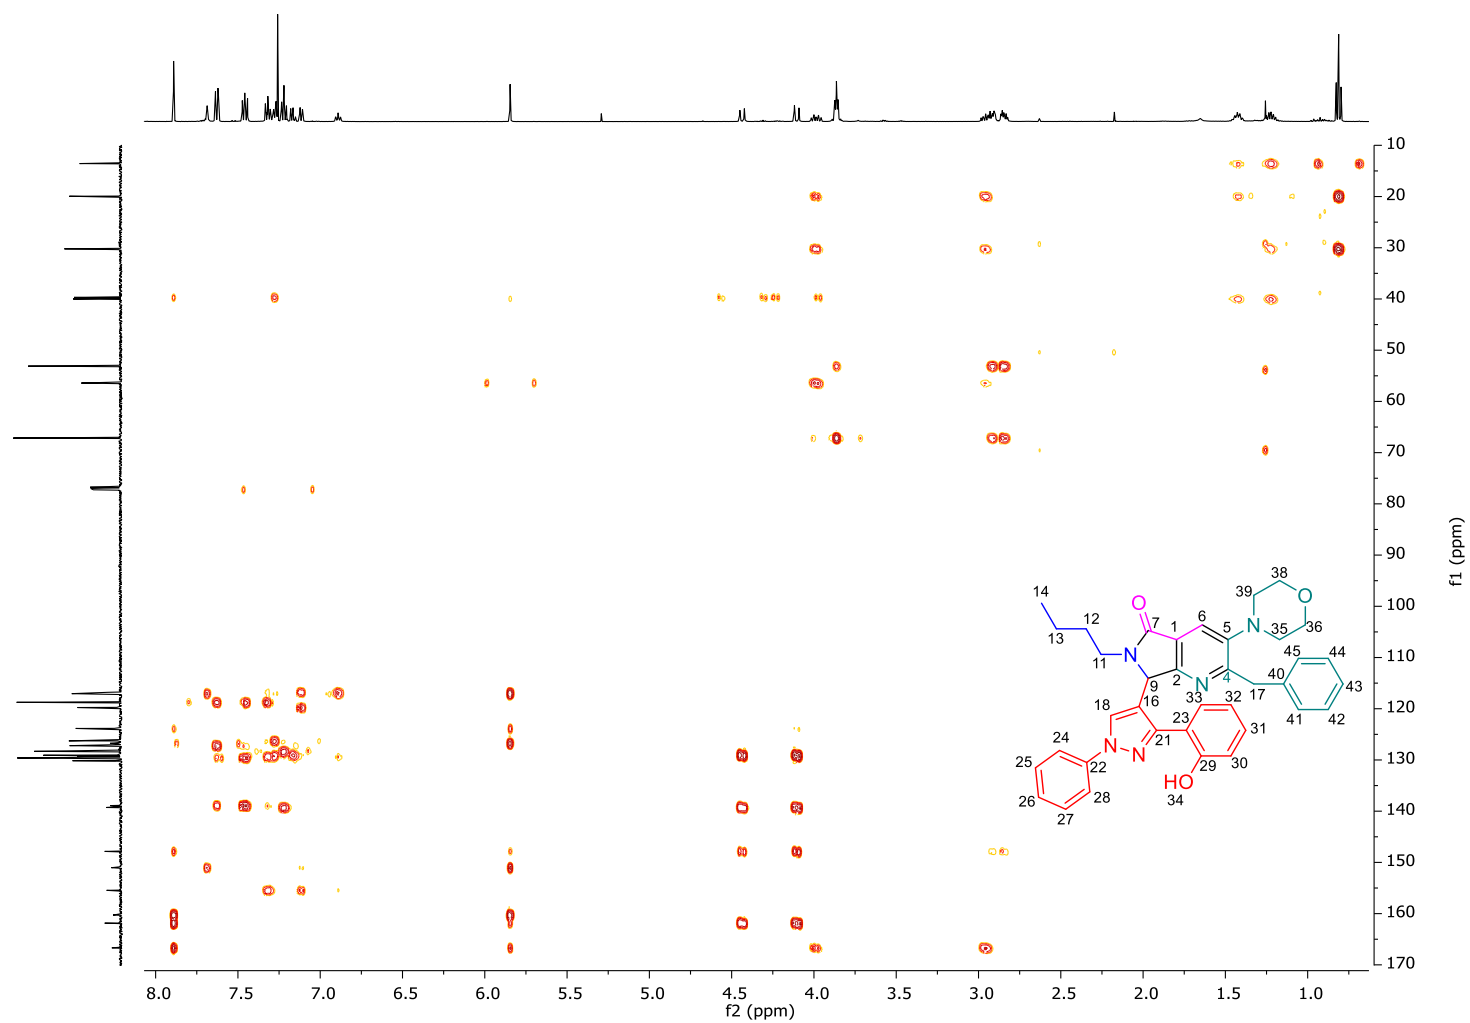

**Figure S22.** 2D HMBC NMR Spectrum of compound **6b**.



2-Benzyl-7-(3-(2-hydroxyphenyl)-1-phenyl-1*H*-pyrazol-4-yl)-3-morpholino-6-phenethyl-6,7-dihydro-5*H*-pyrrolo[3,4-*b*]pyridin-5-one (**6c**).

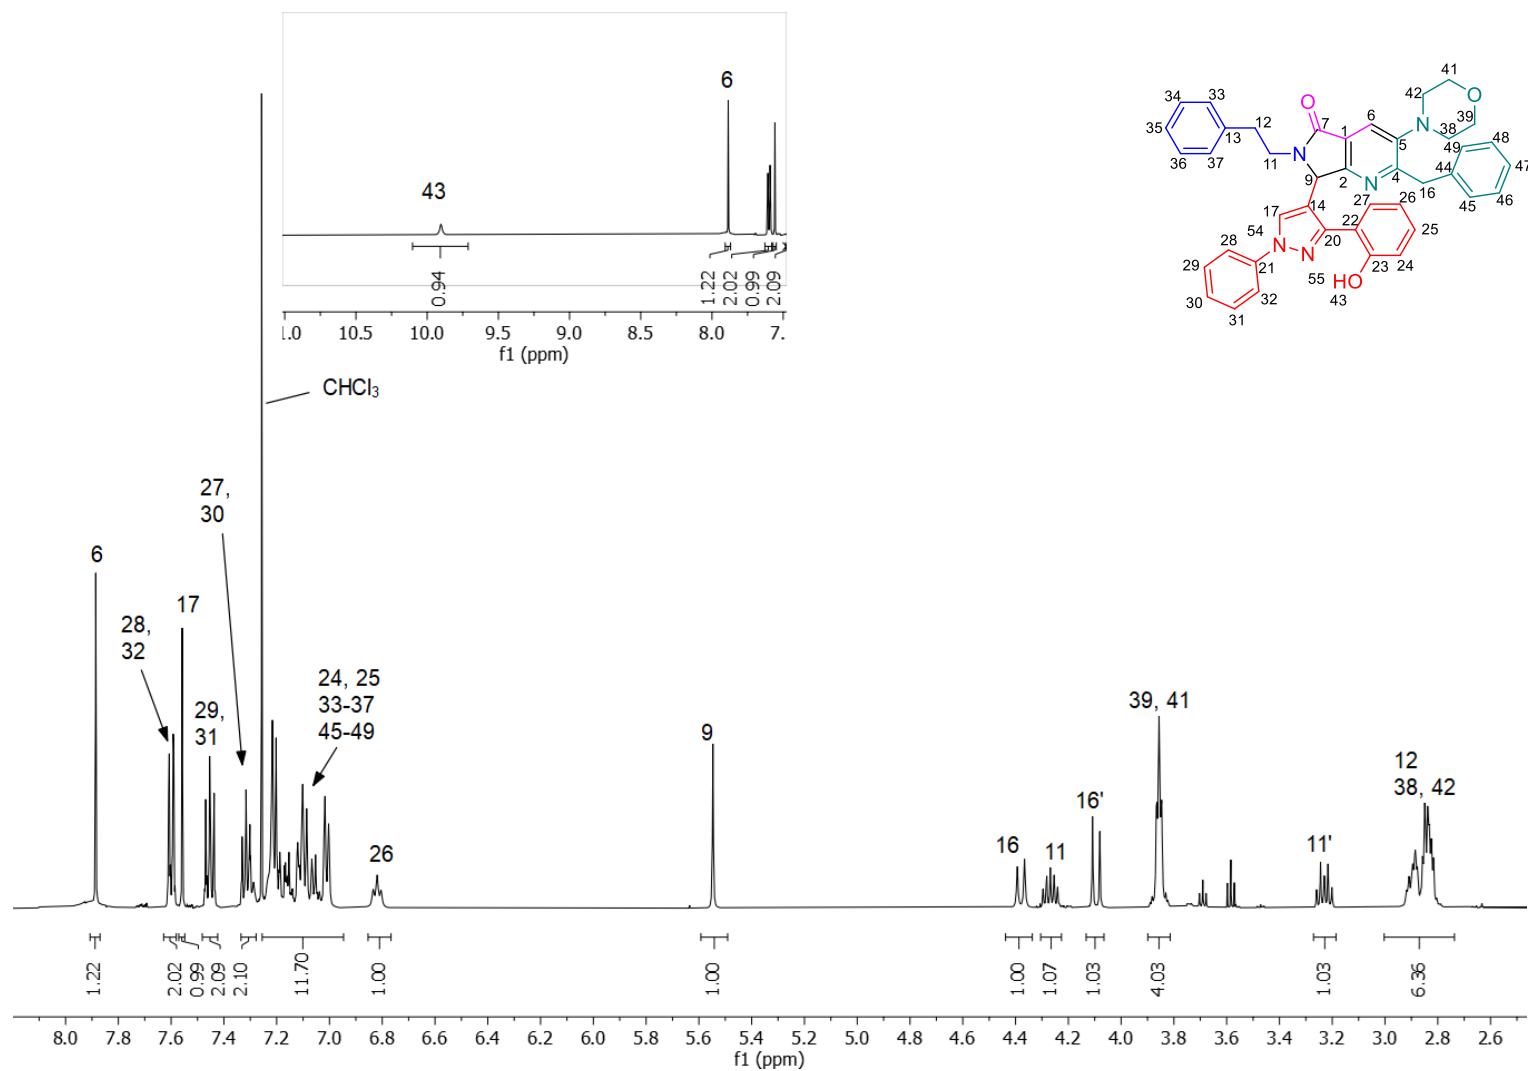

Figure S23. <sup>1</sup>H NMR of compound **6c** in CDCl<sub>3</sub> at 500 MHz.

2-Benzyl-7-(3-(2-hydroxyphenyl)-1-phenyl-1*H*-pyrazol-4-yl)-3-morpholino-6-phenethyl-6,7-dihydro-5*H*-pyrrolo[3,4-*b*]pyridin-5-one (**6c**).

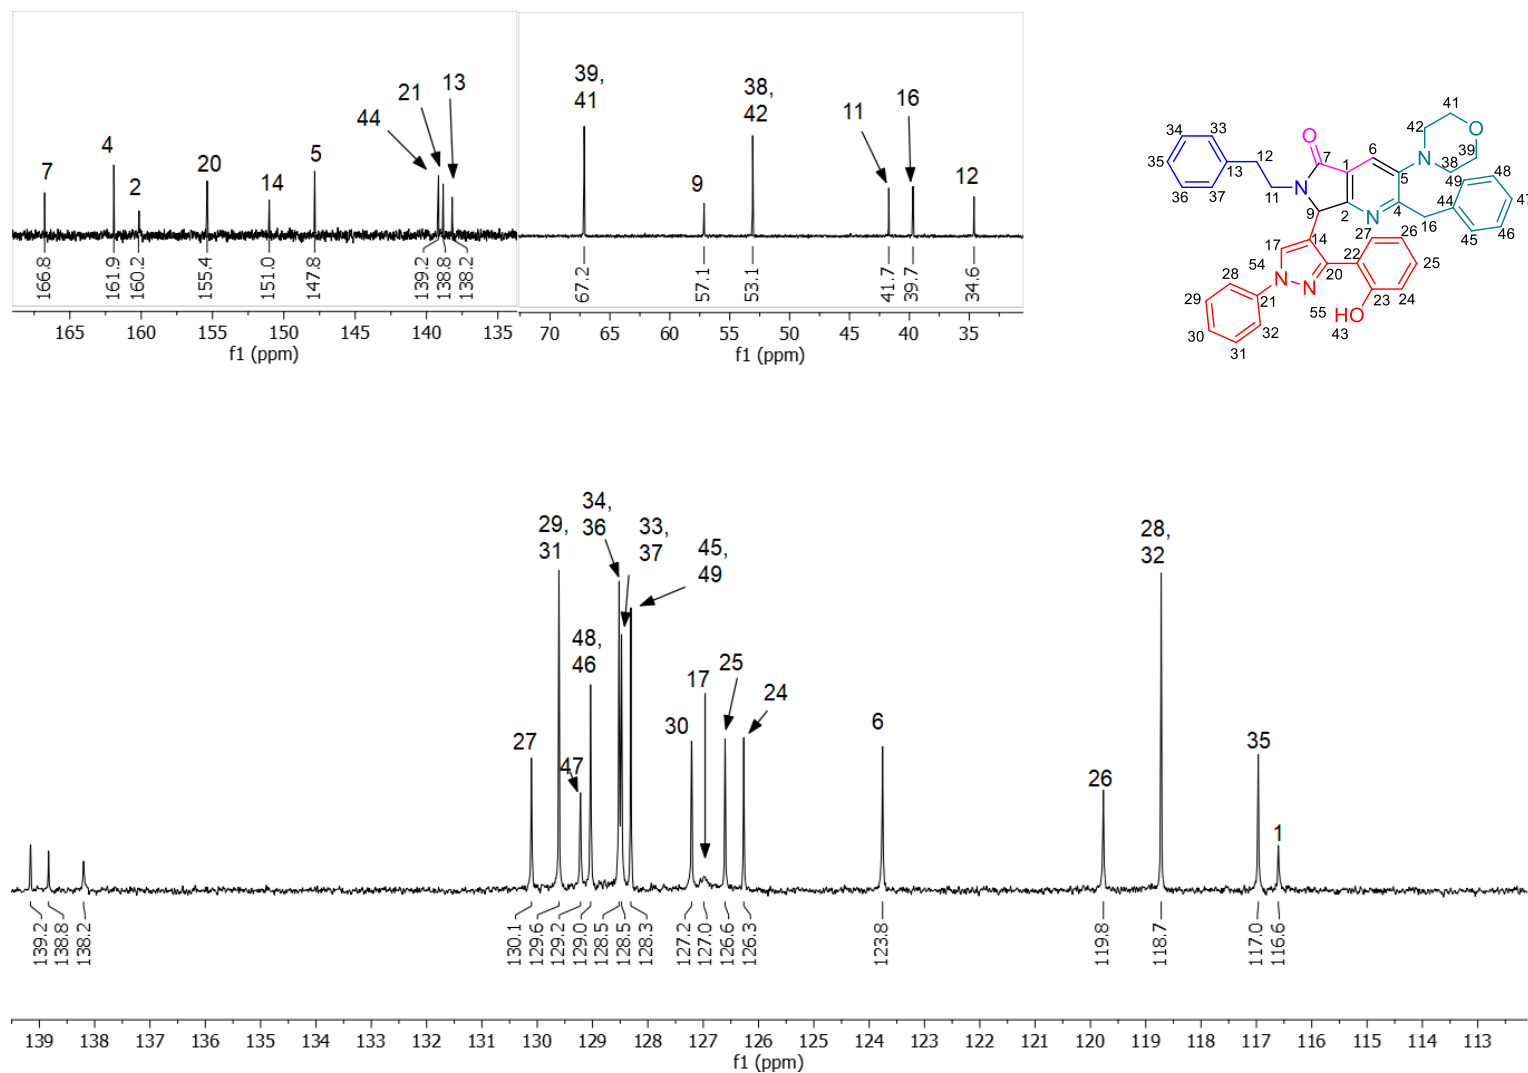

Figure S24. <sup>13</sup>C NMR of compound **6c** in CDCl<sub>3</sub> at 126 MHz.

2-Benzyl-7-(3-(2-hydroxyphenyl)-1-phenyl-1*H*-pyrazol-4-yl)-3-morpholino-6-phenethyl-6,7-dihydro-5*H*-pyrrolo[3,4-*b*]pyridin-5-one (**6c**).

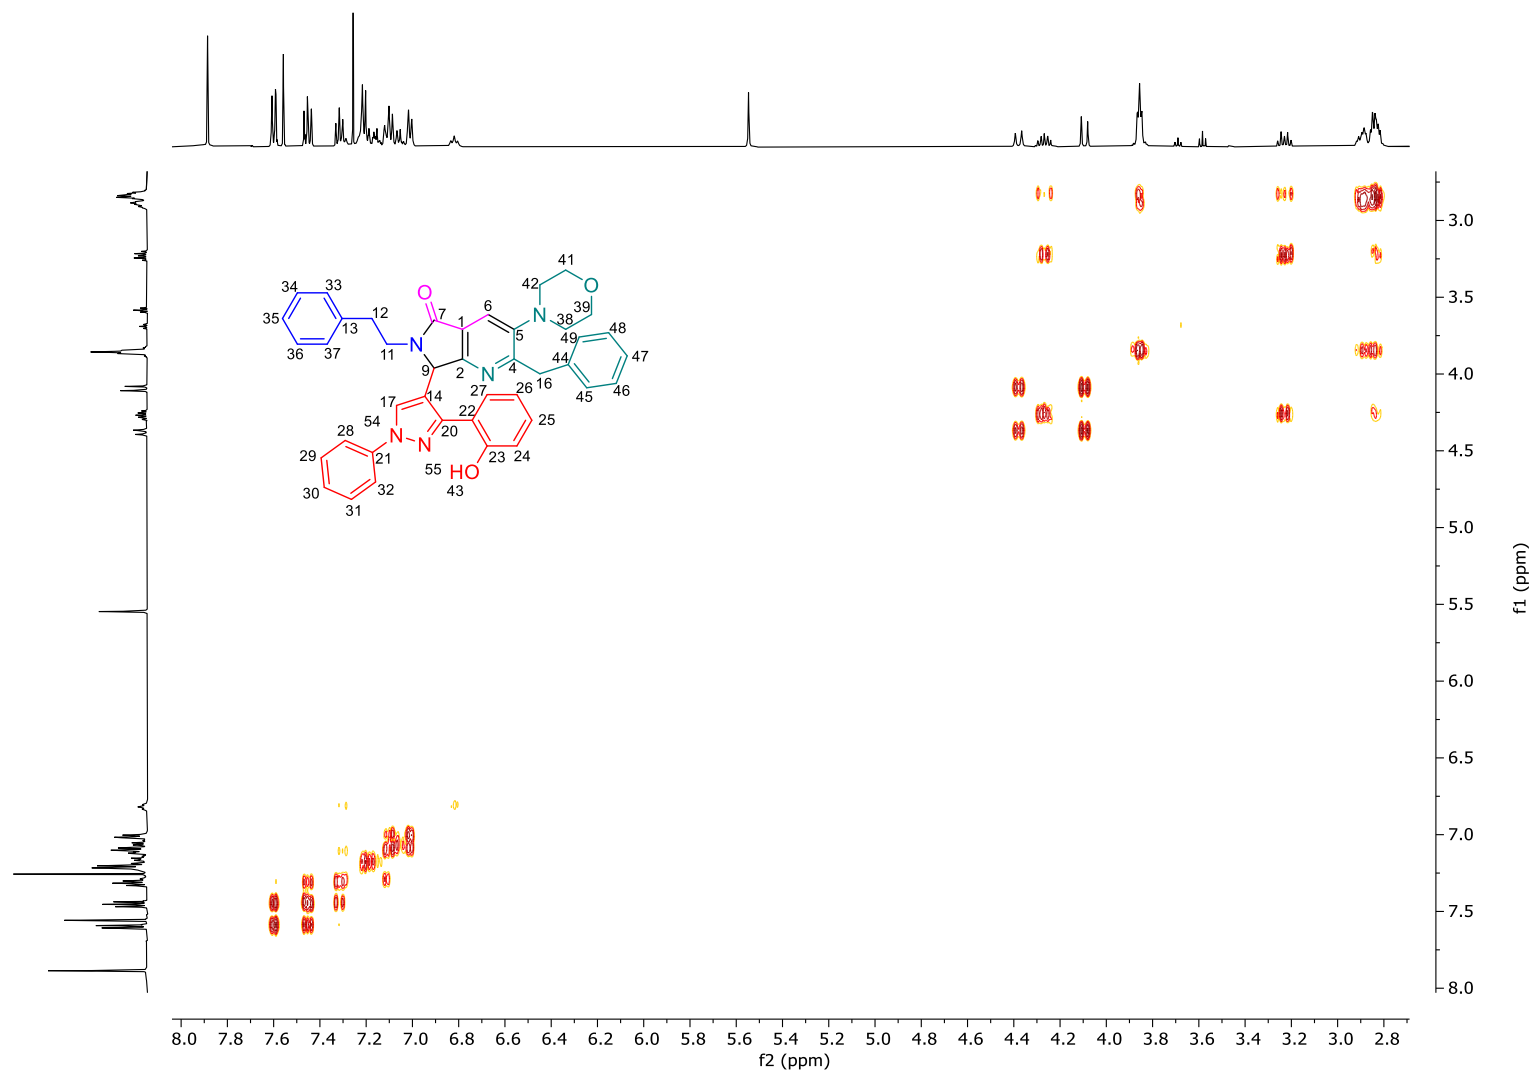

**Figure S25.** 2D COSY NMR Spectrum of compound **6c**.

2-Benzyl-7-(3-(2-hydroxyphenyl)-1-phenyl-1*H*-pyrazol-4-yl)-3-morpholino-6-phenethyl-6,7-dihydro-5*H*-pyrrolo[3,4-*b*]pyridin-5-one (**6c**).

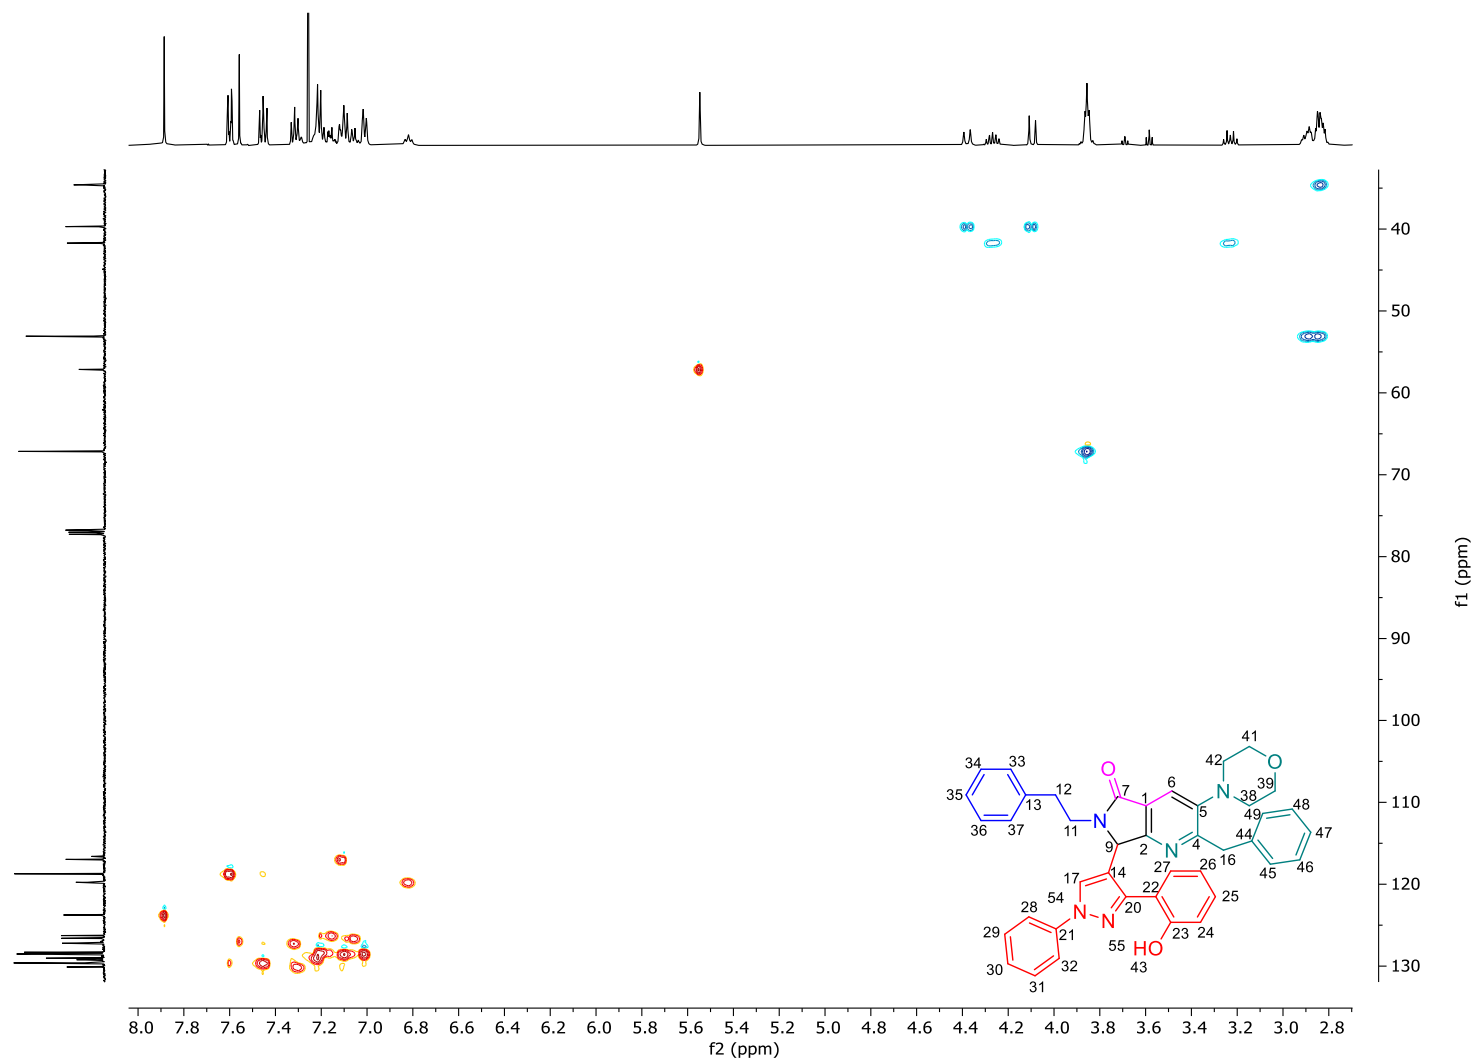

**Figure S26.** 2D HSQC NMR Spectrum of compound **6c**.

2-Benzyl-7-(3-(2-hydroxyphenyl)-1-phenyl-1*H*-pyrazol-4-yl)-3-morpholino-6-phenethyl-6,7-dihydro-5*H*-pyrrolo[3,4-*b*]pyridin-5-one (**6c**).

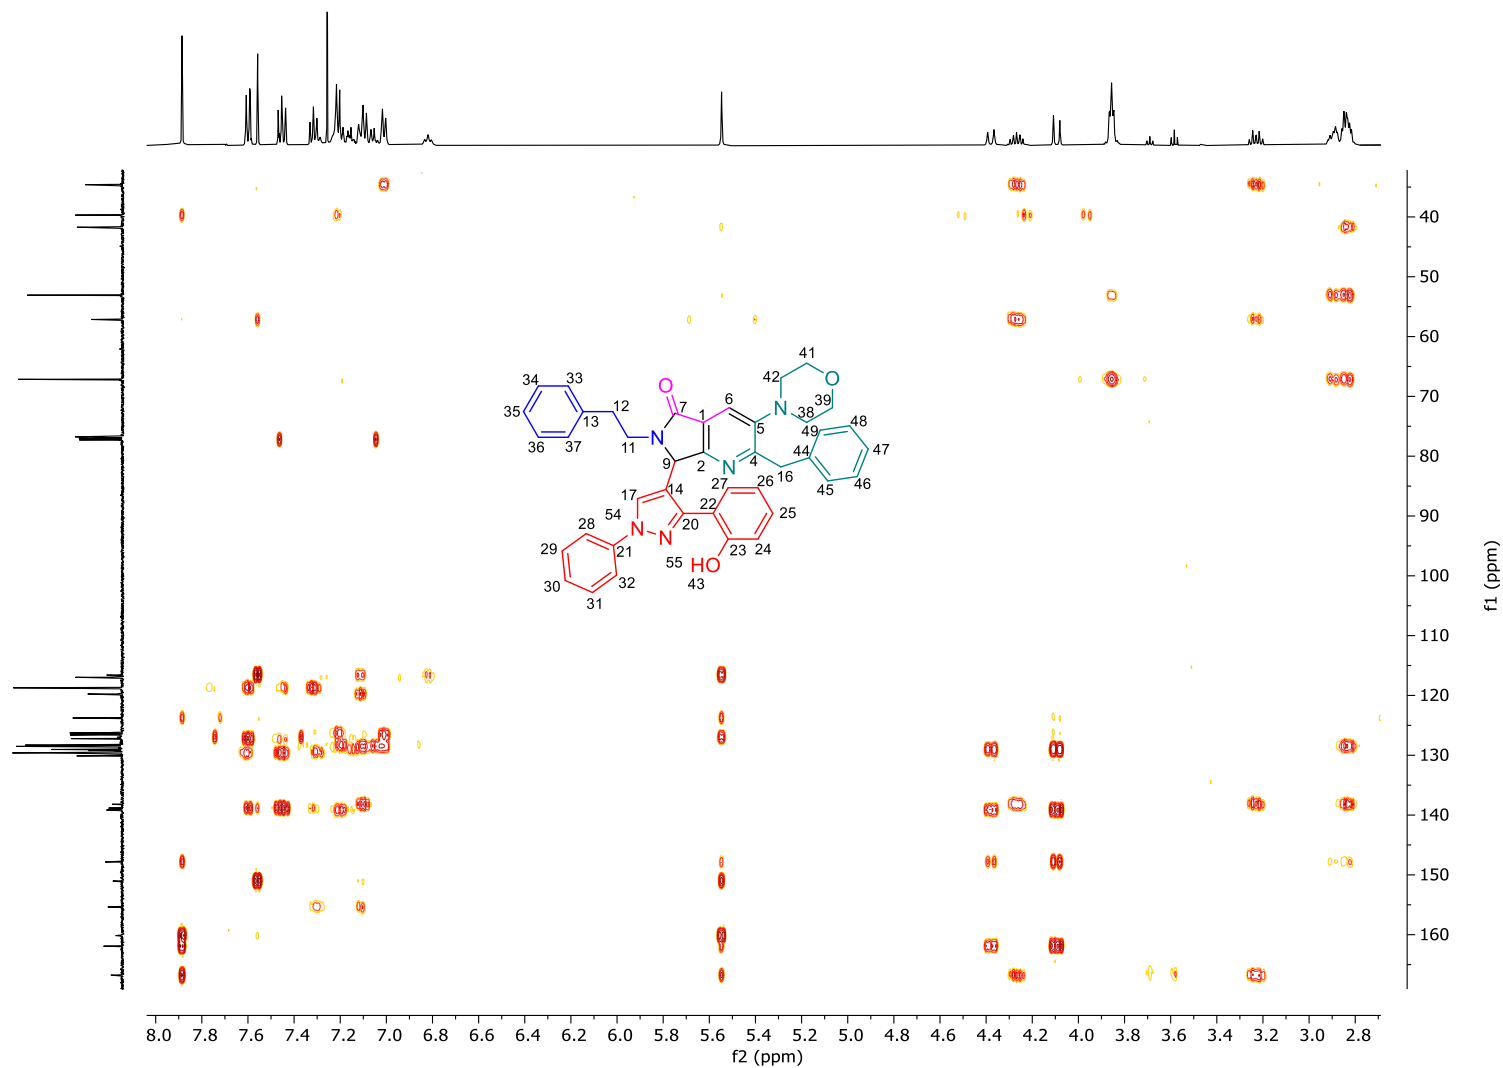

Figure S27. 2D HMBC NMR Spectrum of compound **6c**.

2-Benzyl-6-(3,4-dimethoxybenzyl)-7-(3-(2-hydroxyphenyl)-1-phenyl-1*H*-pyrazol-4-yl)-3-morpholino-6,7-dihydro-5*H*-pyrrolo[3,4-*b*]pyridin-5-one (6d).

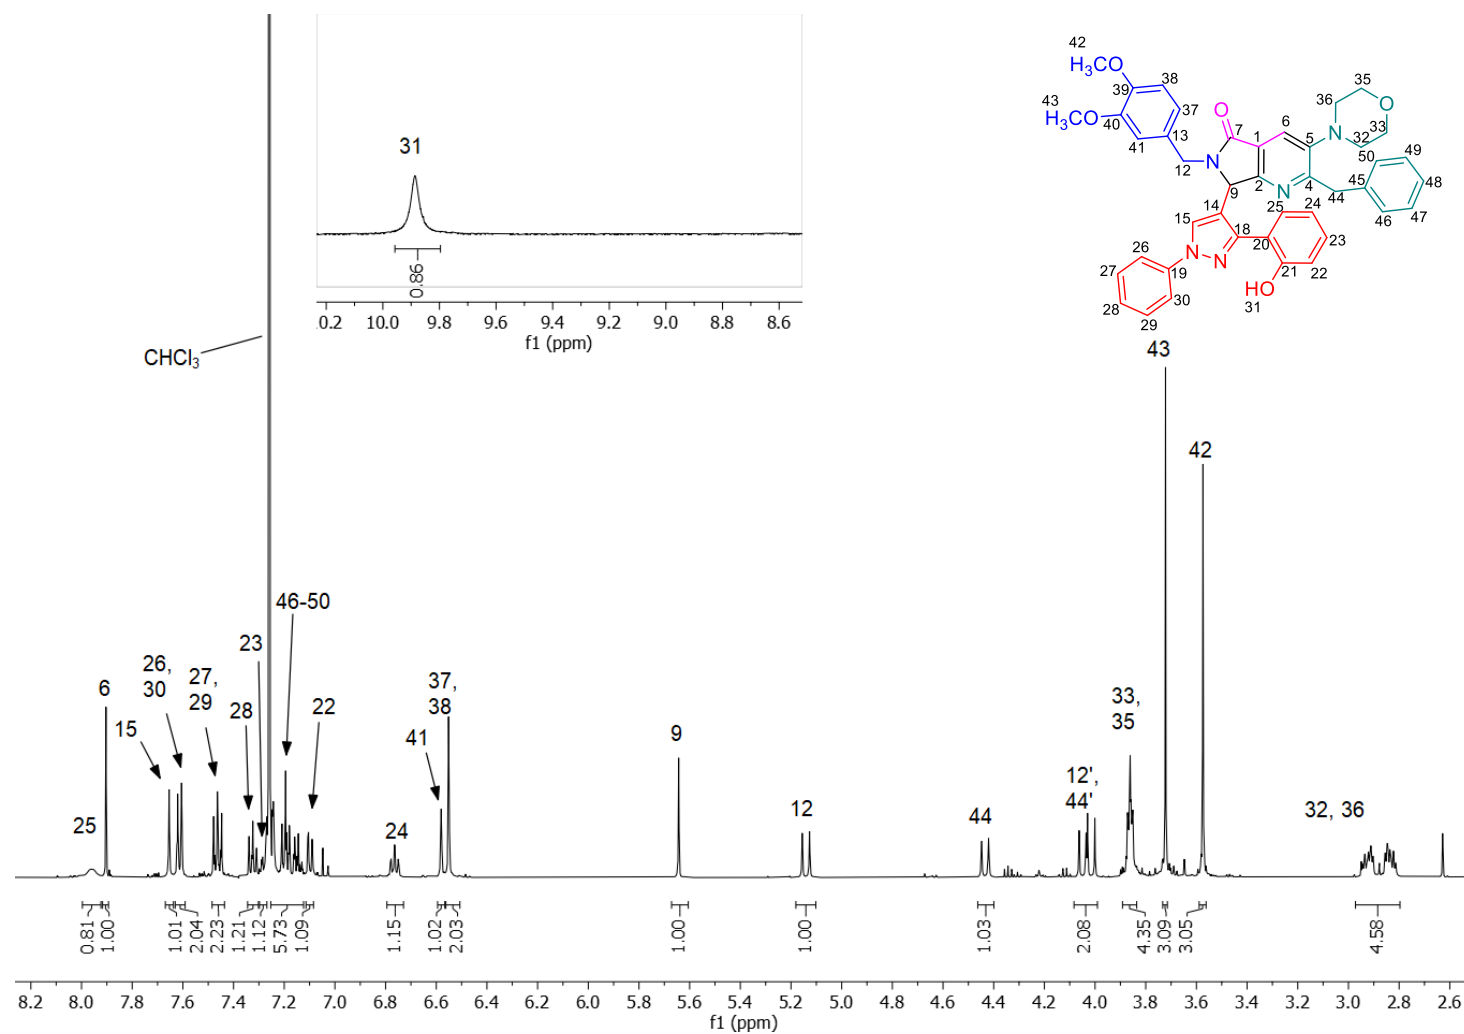

Figure S28. <sup>1</sup>H NMR of compound 6d in CDCl<sub>3</sub> at 500 MHz.

2-Benzyl-6-(3,4-dimethoxybenzyl)-7-(3-(2-hydroxyphenyl)-1-phenyl-1*H*-pyrazol-4-yl)-3-morpholino-6,7-dihydro-5*H*-pyrrolo[3,4-*b*]pyridin-5-one (**6d**).

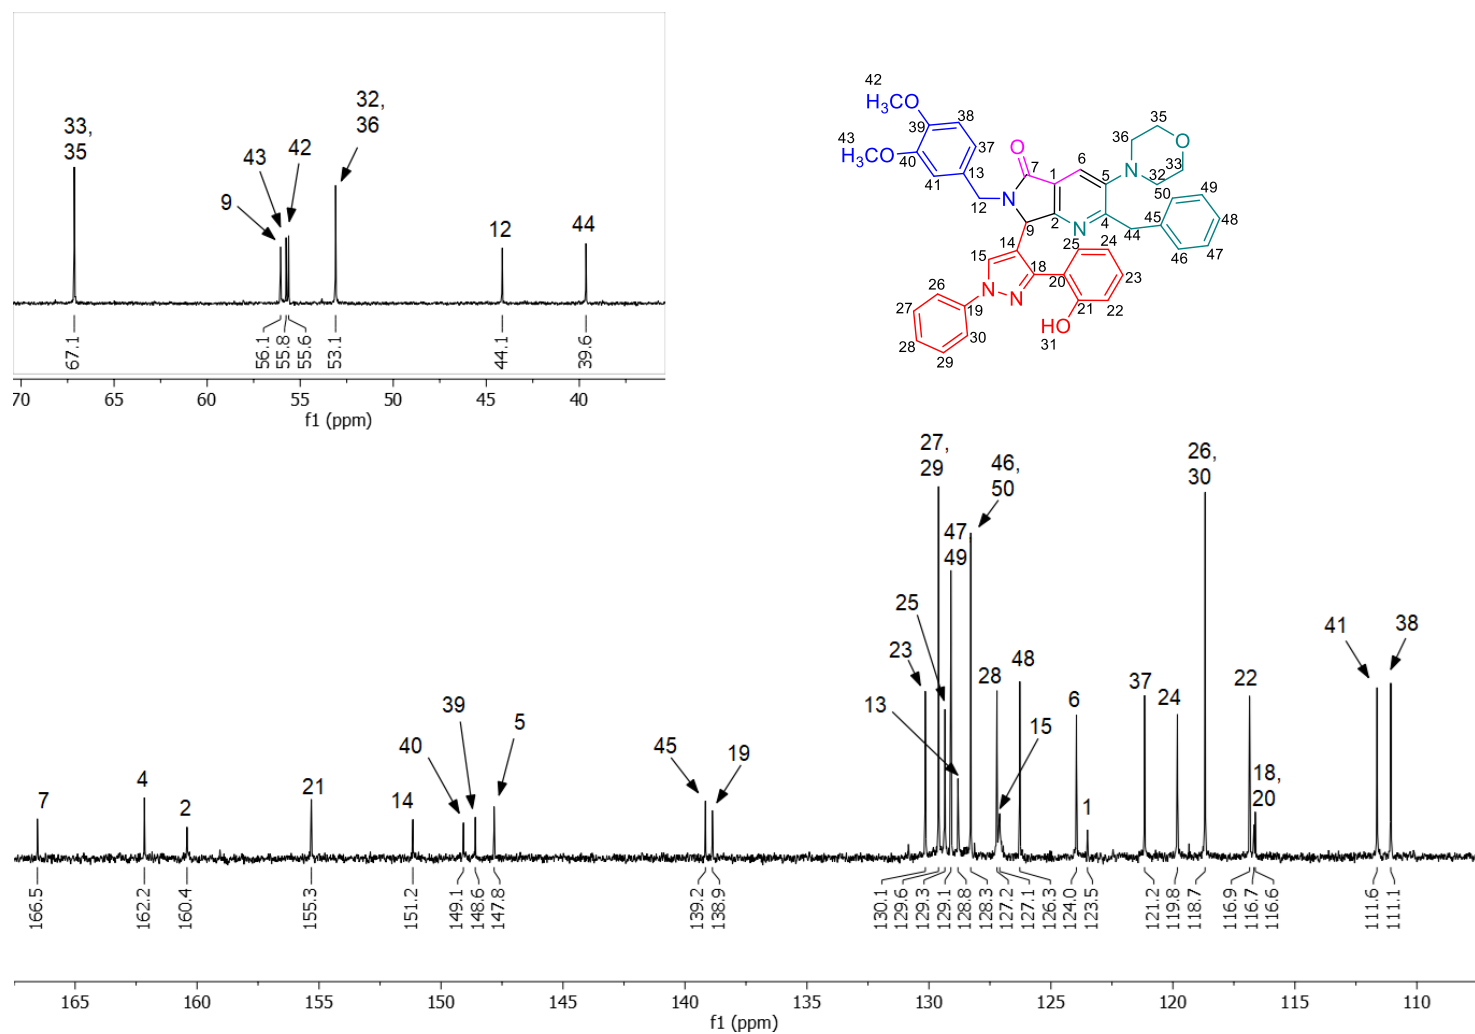

Figure S29. <sup>13</sup>C NMR of compound **6d** in CDCl<sub>3</sub> at 126 MHz.

2-Benzyl-6-(3,4-dimethoxybenzyl)-7-(3-(2-hydroxyphenyl)-1-phenyl-1*H*-pyrazol-4-yl)-3-morpholino-6,7-dihydro-5*H*-pyrrolo[3,4-*b*]pyridin-5-one  
(6d).

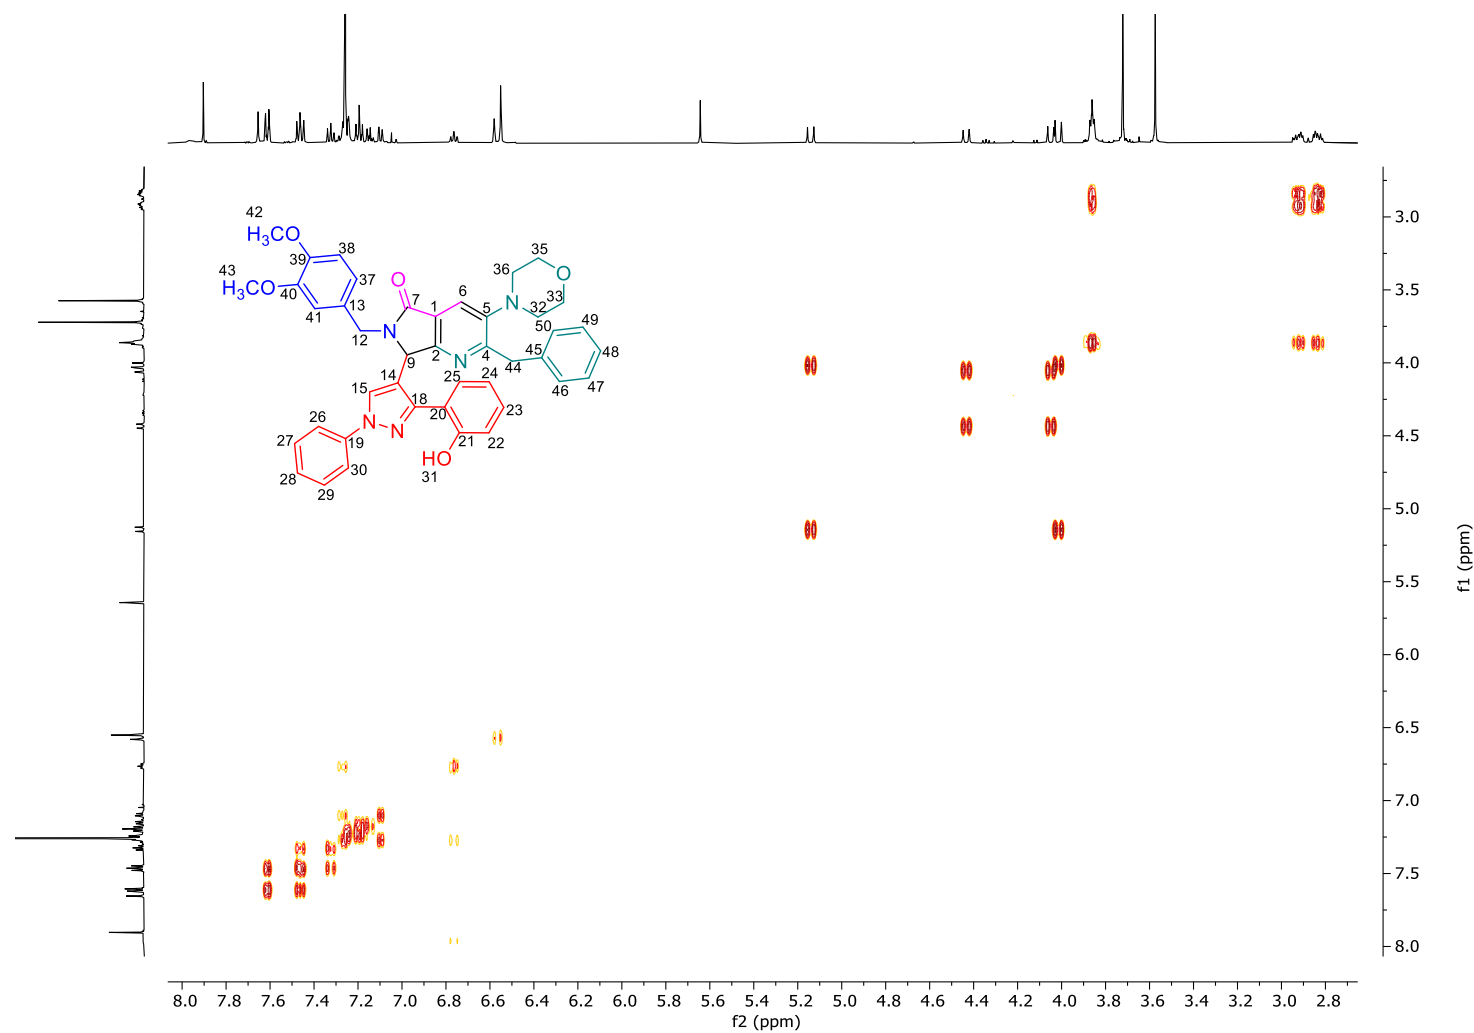

Figure S30. 2D COSY NMR Spectrum of compound 6d.



2-Benzyl-6-(3,4-dimethoxybenzyl)-7-(3-(2-hydroxyphenyl)-1-phenyl-1H-pyrazol-4-yl)-3-morpholino-6,7-dihydro-5H-pyrrolo[3,4-b]pyridin-5-one (6d).

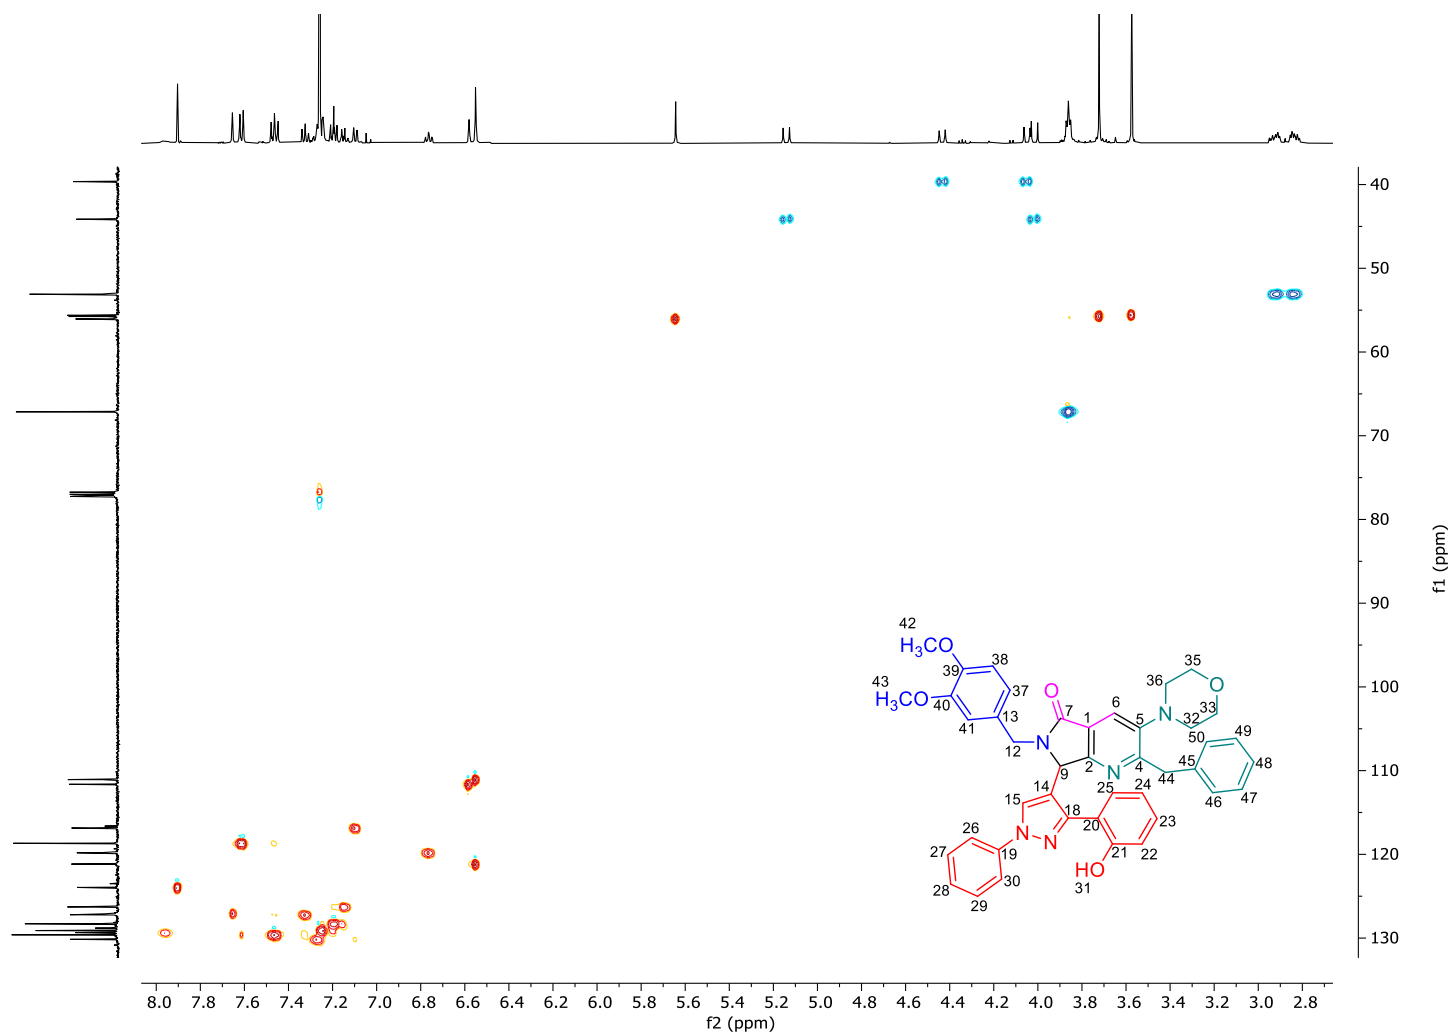

Figure S31. 2D HSQC NMR Spectrum of compound 6d.

2-Benzyl-6-(3,4-dimethoxybenzyl)-7-(3-(2-hydroxyphenyl)-1-phenyl-1*H*-pyrazol-4-yl)-3-morpholino-6,7-dihydro-5*H*-pyrrolo[3,4-*b*]pyridin-5-one  
(6e).

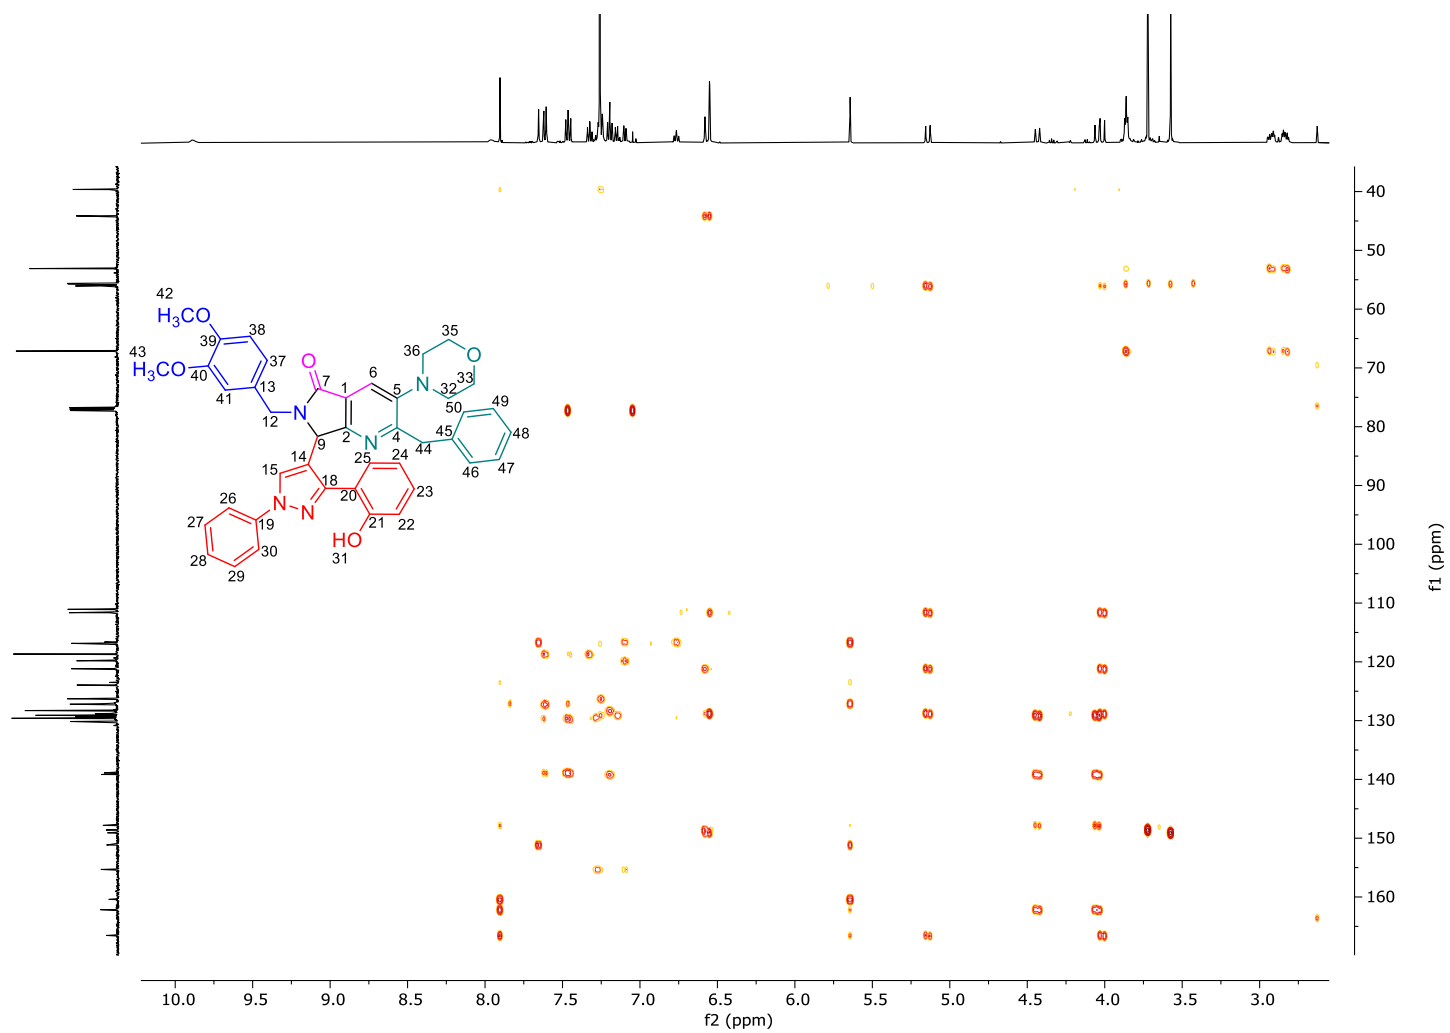

Figure S32. 2D HMBC NMR Spectrum of compound 6d.

2-Benzyl-6-(4-fluorobenzyl)-7-(3-(2-hydroxyphenyl)-1-phenyl-1*H*-pyrazol-4-yl)-3-morpholino-6,7-dihydro-5*H*-pyrrolo[3,4-*b*]pyridin-5-one (**6e**).

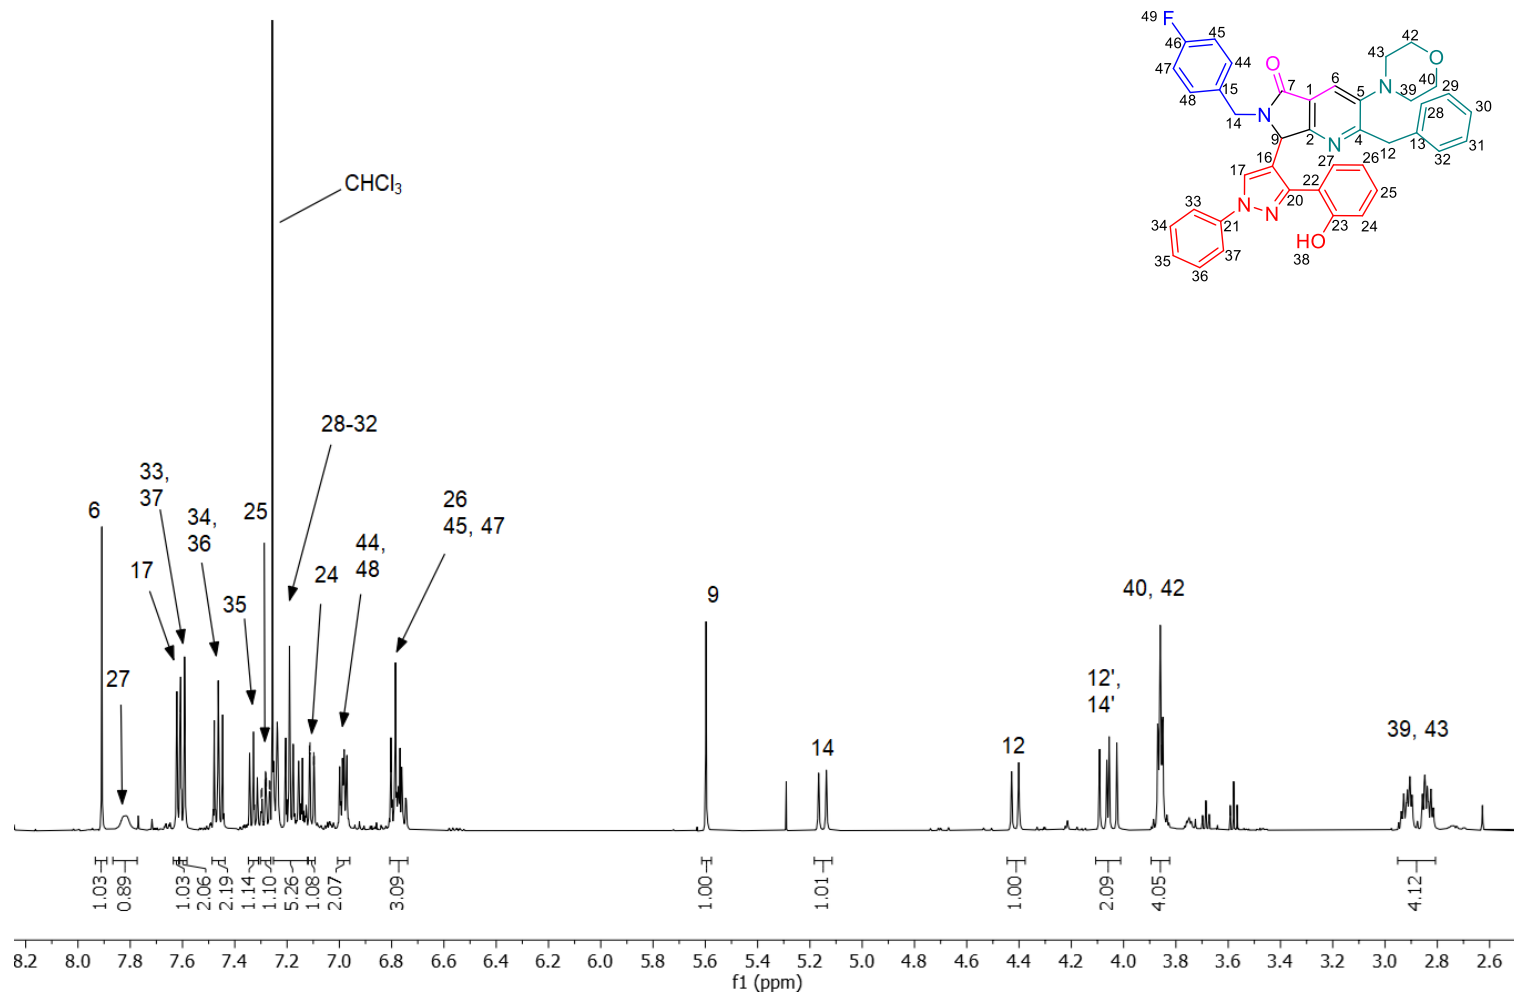

Figure S33. <sup>1</sup>H NMR of compound **6e** in CDCl<sub>3</sub> at 500 MHz.

2-Benzyl-6-(4-fluorobenzyl)-7-(3-(2-hydroxyphenyl)-1-phenyl-1*H*-pyrazol-4-yl)-3-morpholino-6,7-dihydro-5*H*-pyrrolo[3,4-*b*]pyridin-5-one (**6e**).

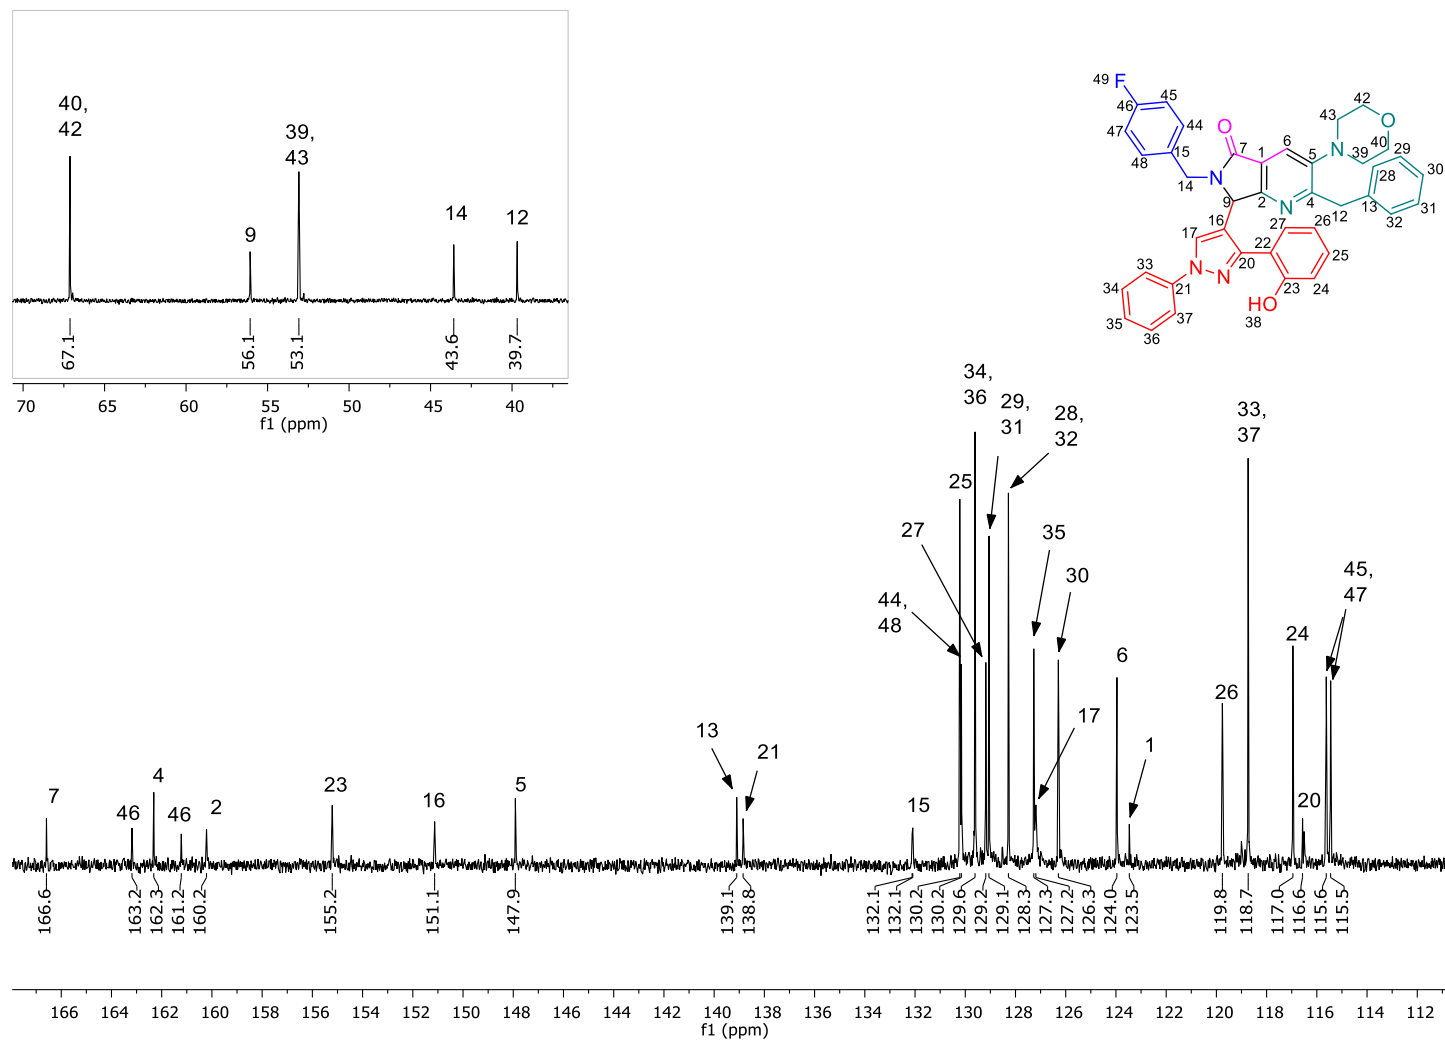

Figure S34. <sup>13</sup>C NMR of compound **6e** in CDCl<sub>3</sub> at 126 MHz

2-Benzyl-6-(4-fluorobenzyl)-7-(3-(2-hydroxyphenyl)-1-phenyl-1*H*-pyrazol-4-yl)-3-morpholino-6,7-dihydro-5*H*-pyrrolo[3,4-*b*]pyridin-5-one (**6e**).

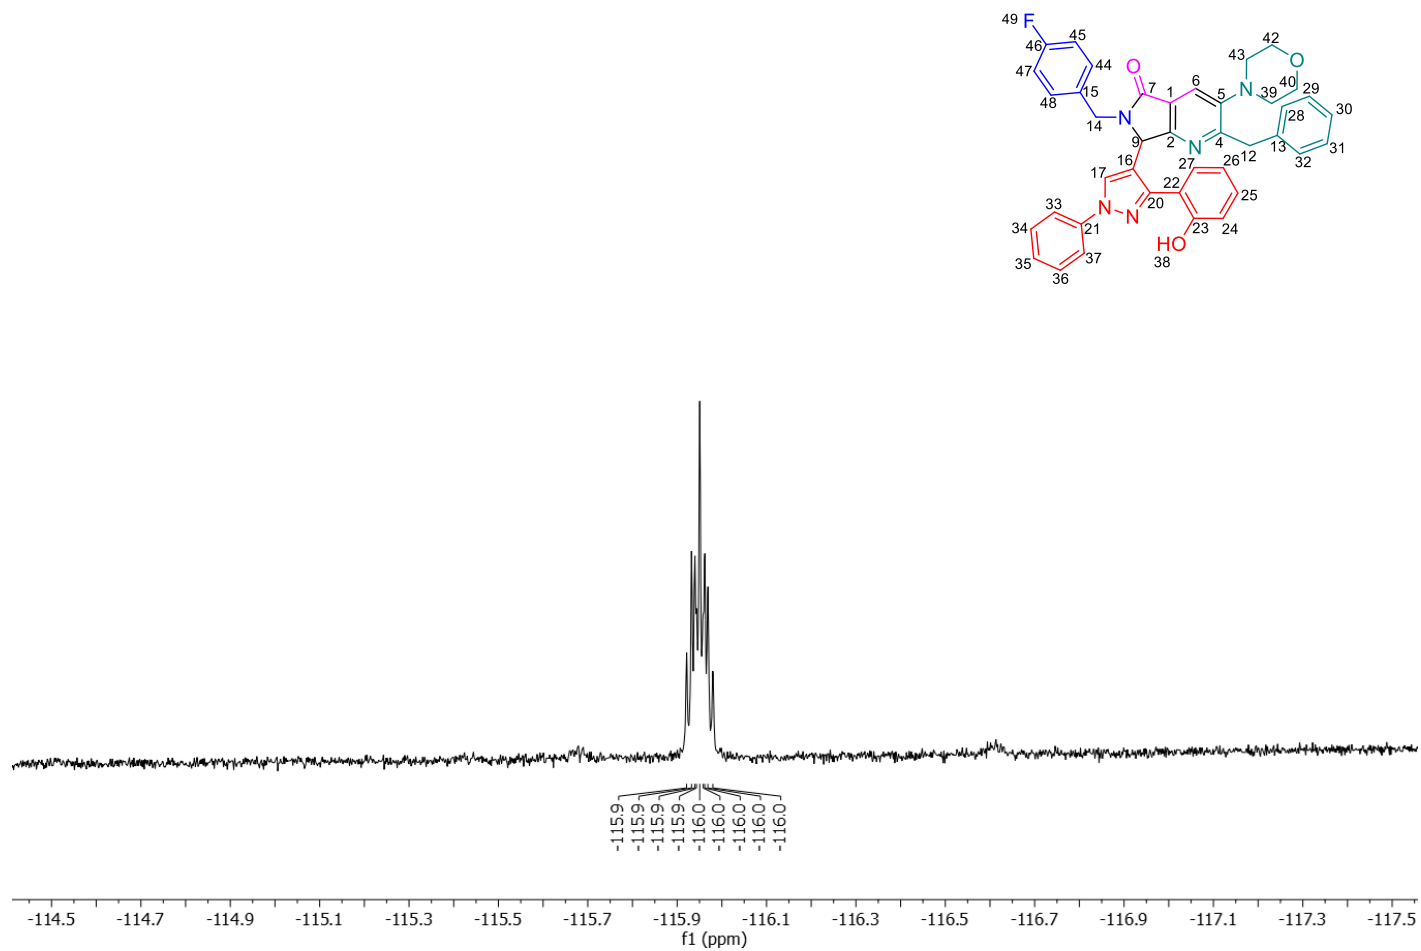

**Figure S35.**  $^{19}\text{F}$  NMR of compound **6e** in  $\text{CDCl}_3$  at 471 MHz.

2-Benzyl-6-(4-fluorobenzyl)-7-(3-(2-hydroxyphenyl)-1-phenyl-1*H*-pyrazol-4-yl)-3-morpholino-6,7-dihydro-5*H*-pyrrolo[3,4-*b*]pyridin-5-one (**6e**).

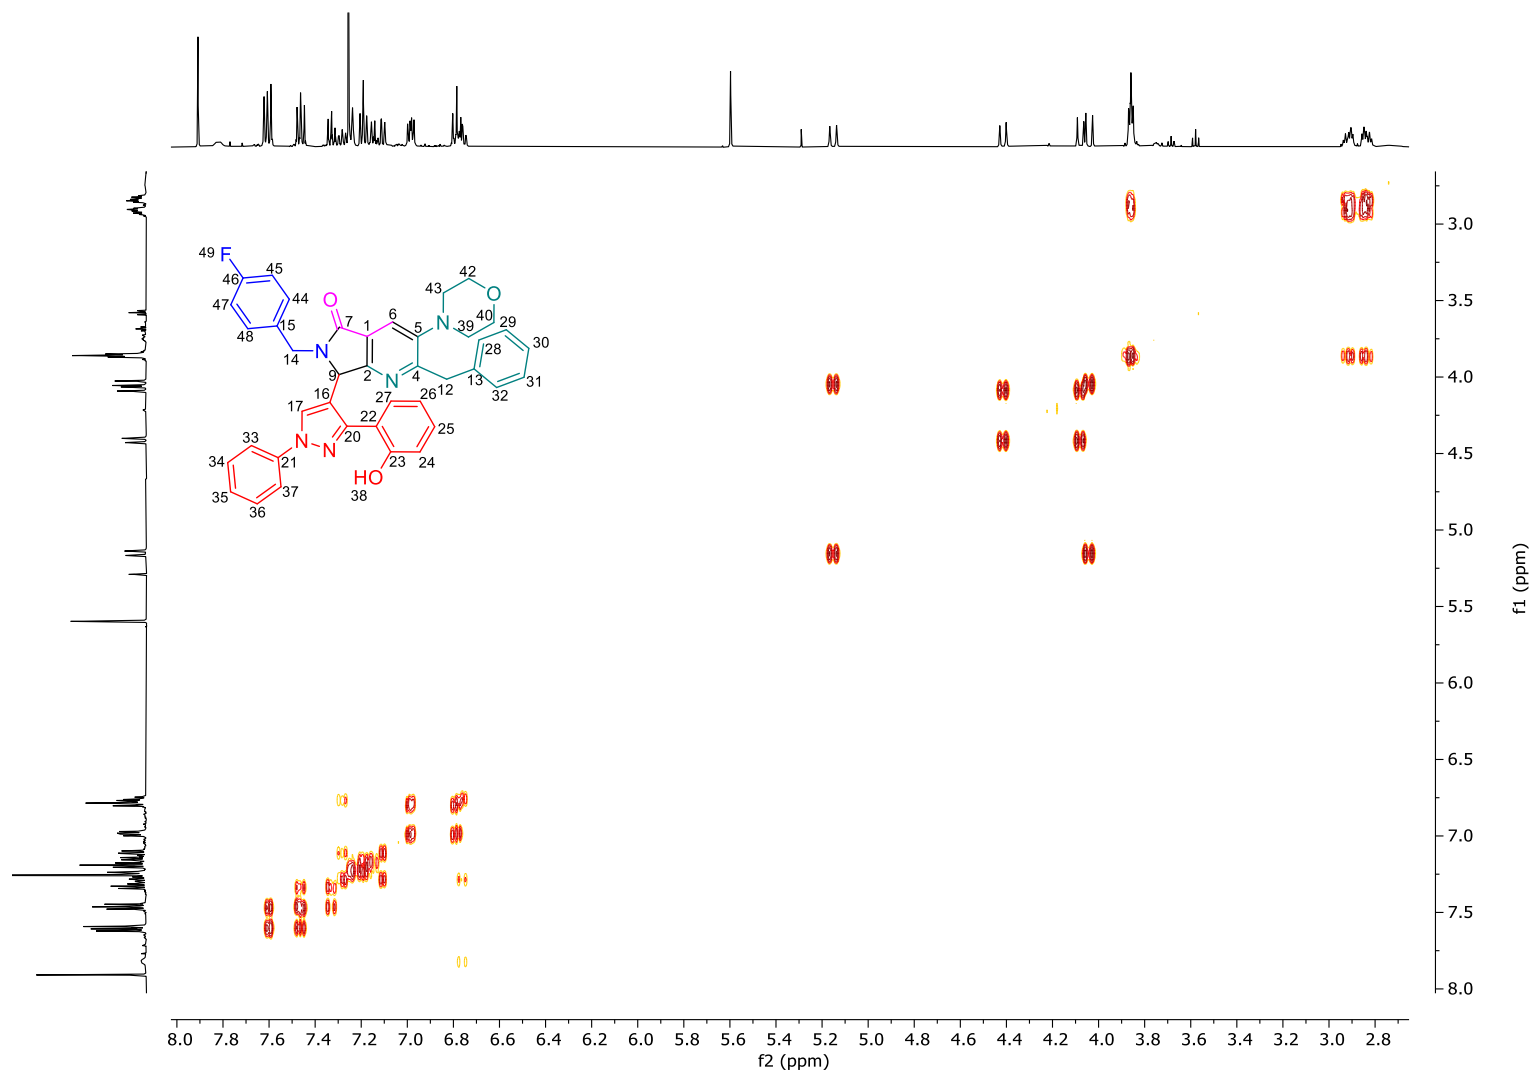

Figure S36. 2D COSY NMR Spectrum of compound **6e**.

2-Benzyl-6-(4-fluorobenzyl)-7-(3-(2-hydroxyphenyl)-1-phenyl-1*H*-pyrazol-4-yl)-3-morpholino-6,7-dihydro-5*H*-pyrrolo[3,4-*b*]pyridin-5-one (**6e**).

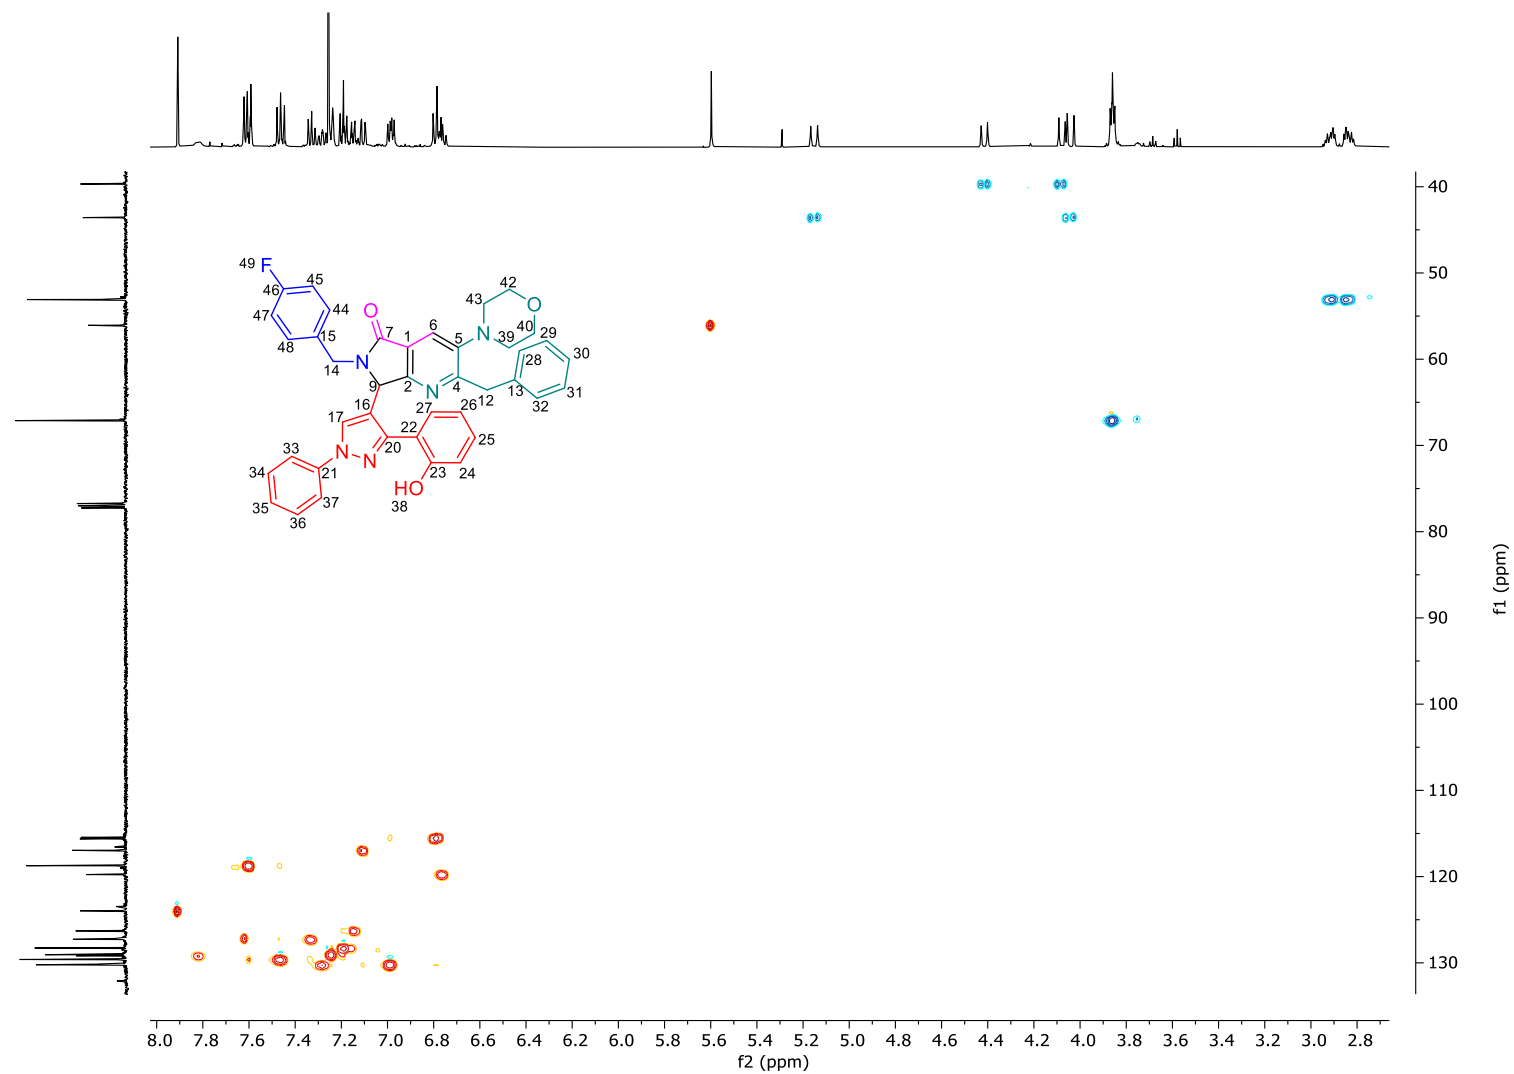

Figure S37. 2D HSQC NMR Spectrum of compound **6e**.

2-Benzyl-6-(4-fluorobenzyl)-7-(3-(2-hydroxyphenyl)-1-phenyl-1*H*-pyrazol-4-yl)-3-morpholino-6,7-dihydro-5*H*-pyrrolo[3,4-*b*]pyridin-5-one (**6e**).

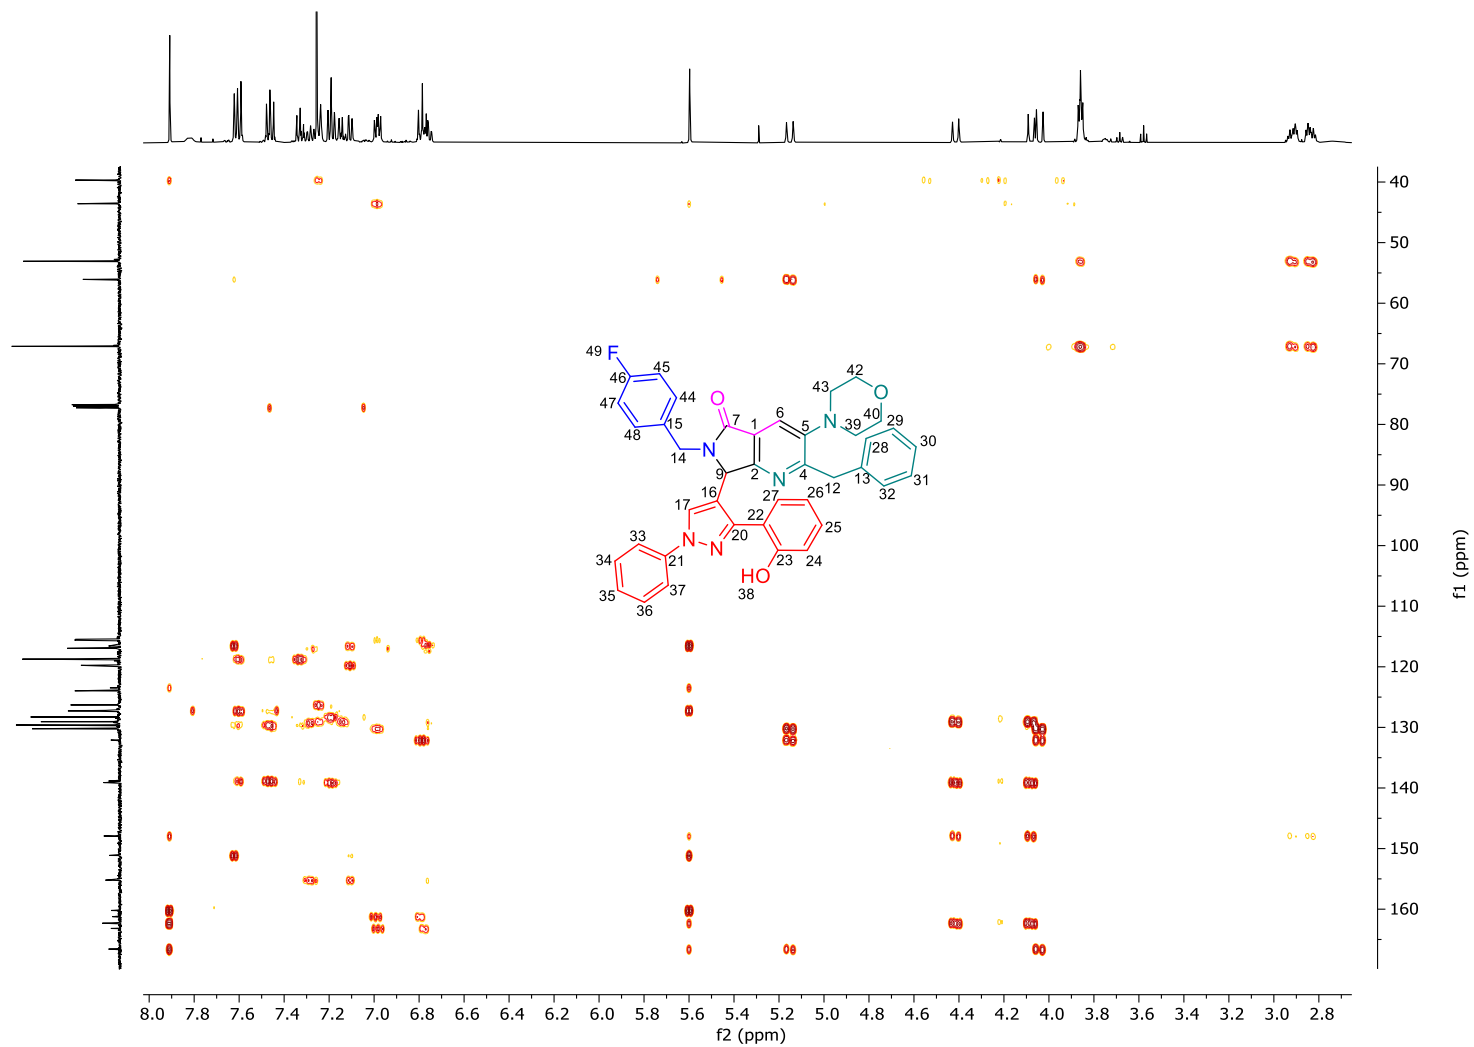



2-Benzyl-7-(3-(2-hydroxyphenyl)-1-phenyl-1*H*-pyrazol-4-yl)-3-morpholino-6-(prop-2-yn-1-yl)-6,7-dihydro-5*H*-pyrrolo[3,4-*b*]pyridin-5-one (**6f**).

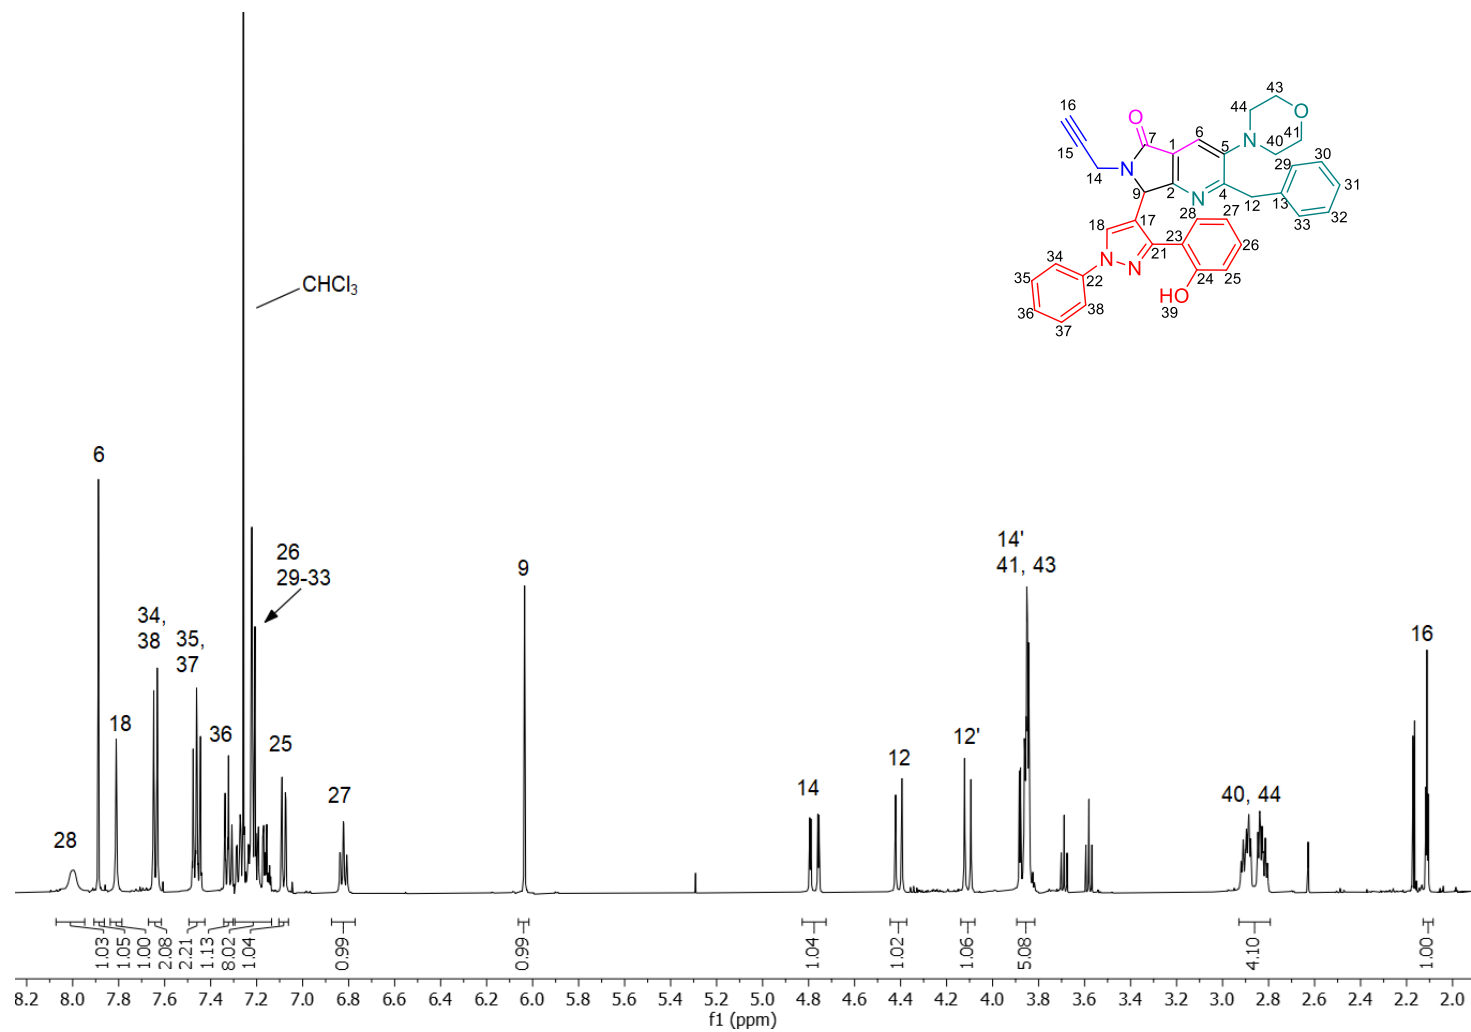

**Figure S39.** <sup>1</sup>H NMR of compound **6f** in CDCl<sub>3</sub> at 500 MHz.

2-Benzyl-7-(3-(2-hydroxyphenyl)-1-phenyl-1*H*-pyrazol-4-yl)-3-morpholino-6-(prop-2-yn-1-yl)-6,7-dihydro-5*H*-pyrrolo[3,4-*b*]pyridin-5-one (**6f**).

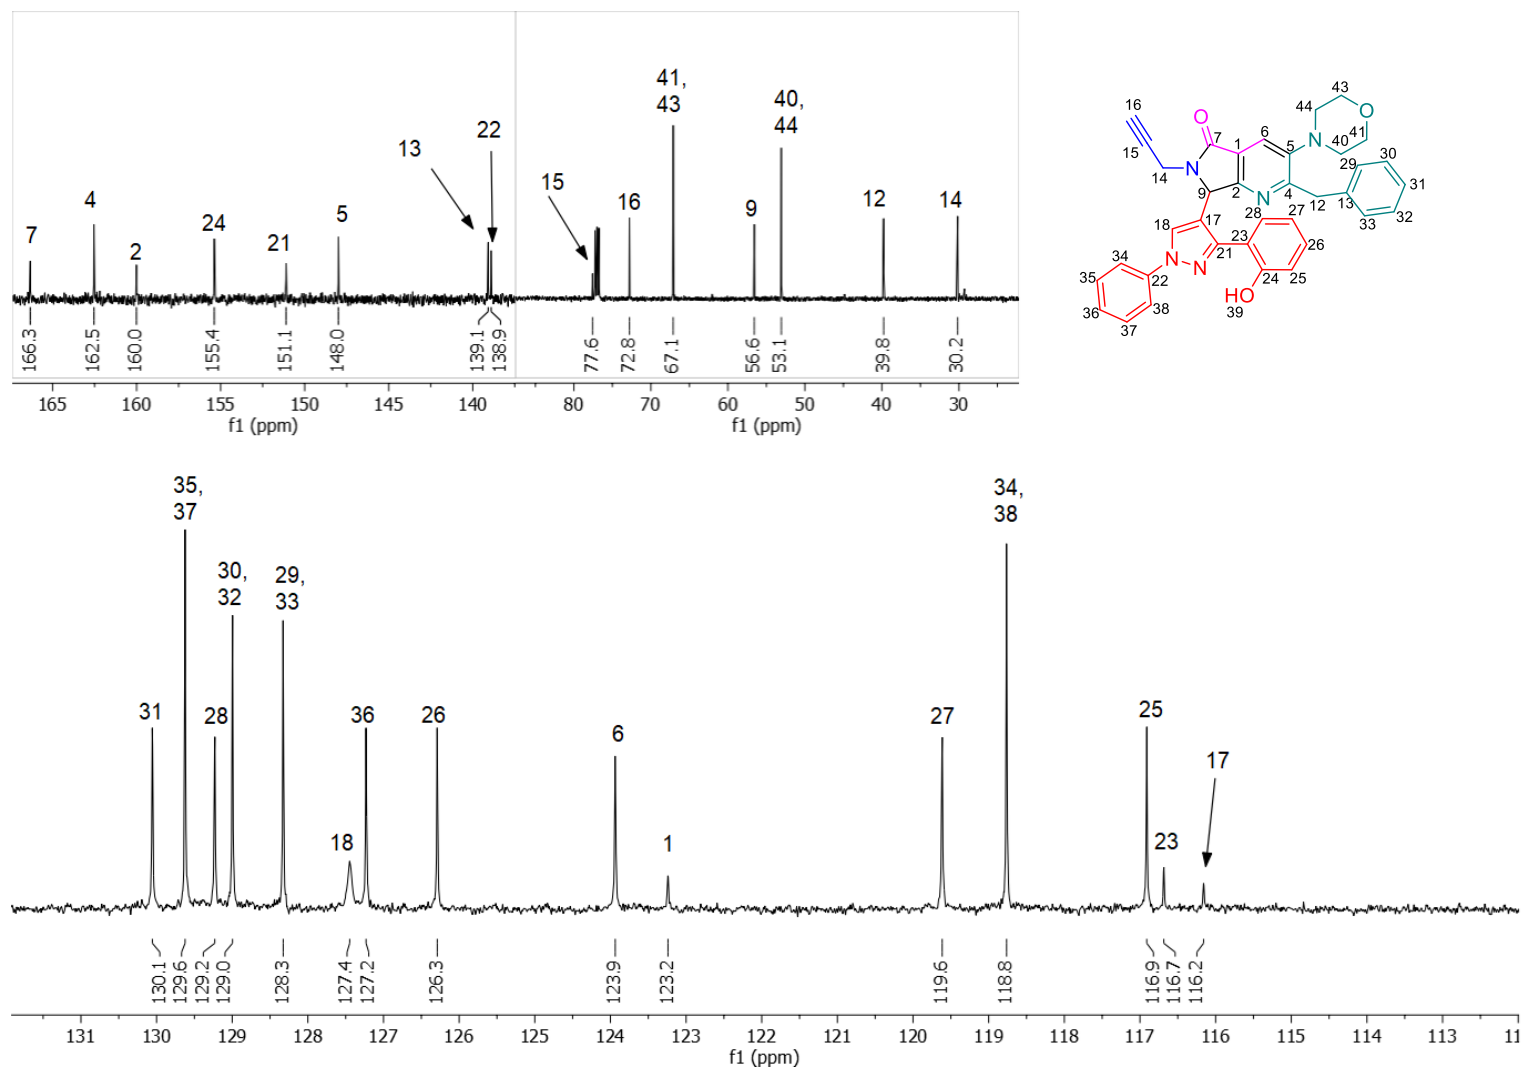

Figure S40. <sup>13</sup>C NMR of compound **6f** in CDCl<sub>3</sub> at 126 MHz.

2-Benzyl-7-(3-(2-hydroxyphenyl)-1-phenyl-1*H*-pyrazol-4-yl)-3-morpholino-6-(prop-2-yn-1-yl)-6,7-dihydro-5*H*-pyrrolo[3,4-*b*]pyridin-5-one (**6f**).

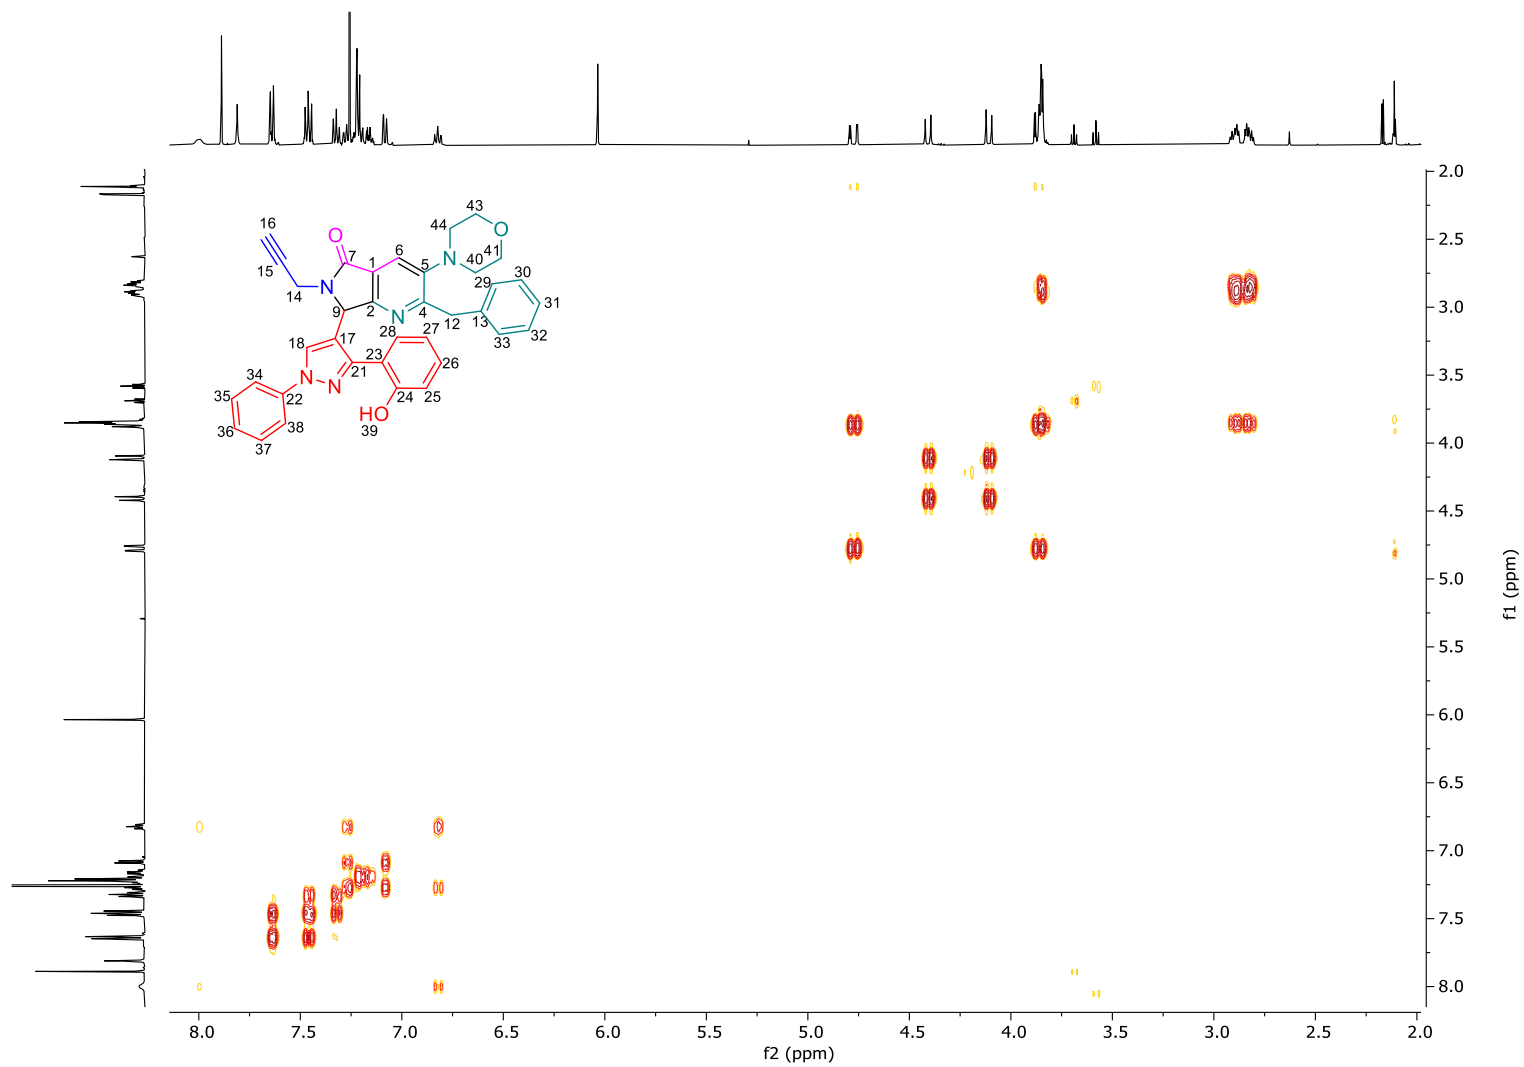

Figure S41. 2D COSY spectrum of compound **6f**.

2-Benzyl-7-(3-(2-hydroxyphenyl)-1-phenyl-1*H*-pyrazol-4-yl)-3-morpholino-6-(prop-2-yn-1-yl)-6,7-dihydro-5*H*-pyrrolo[3,4-*b*]pyridin-5-one (**6f**).

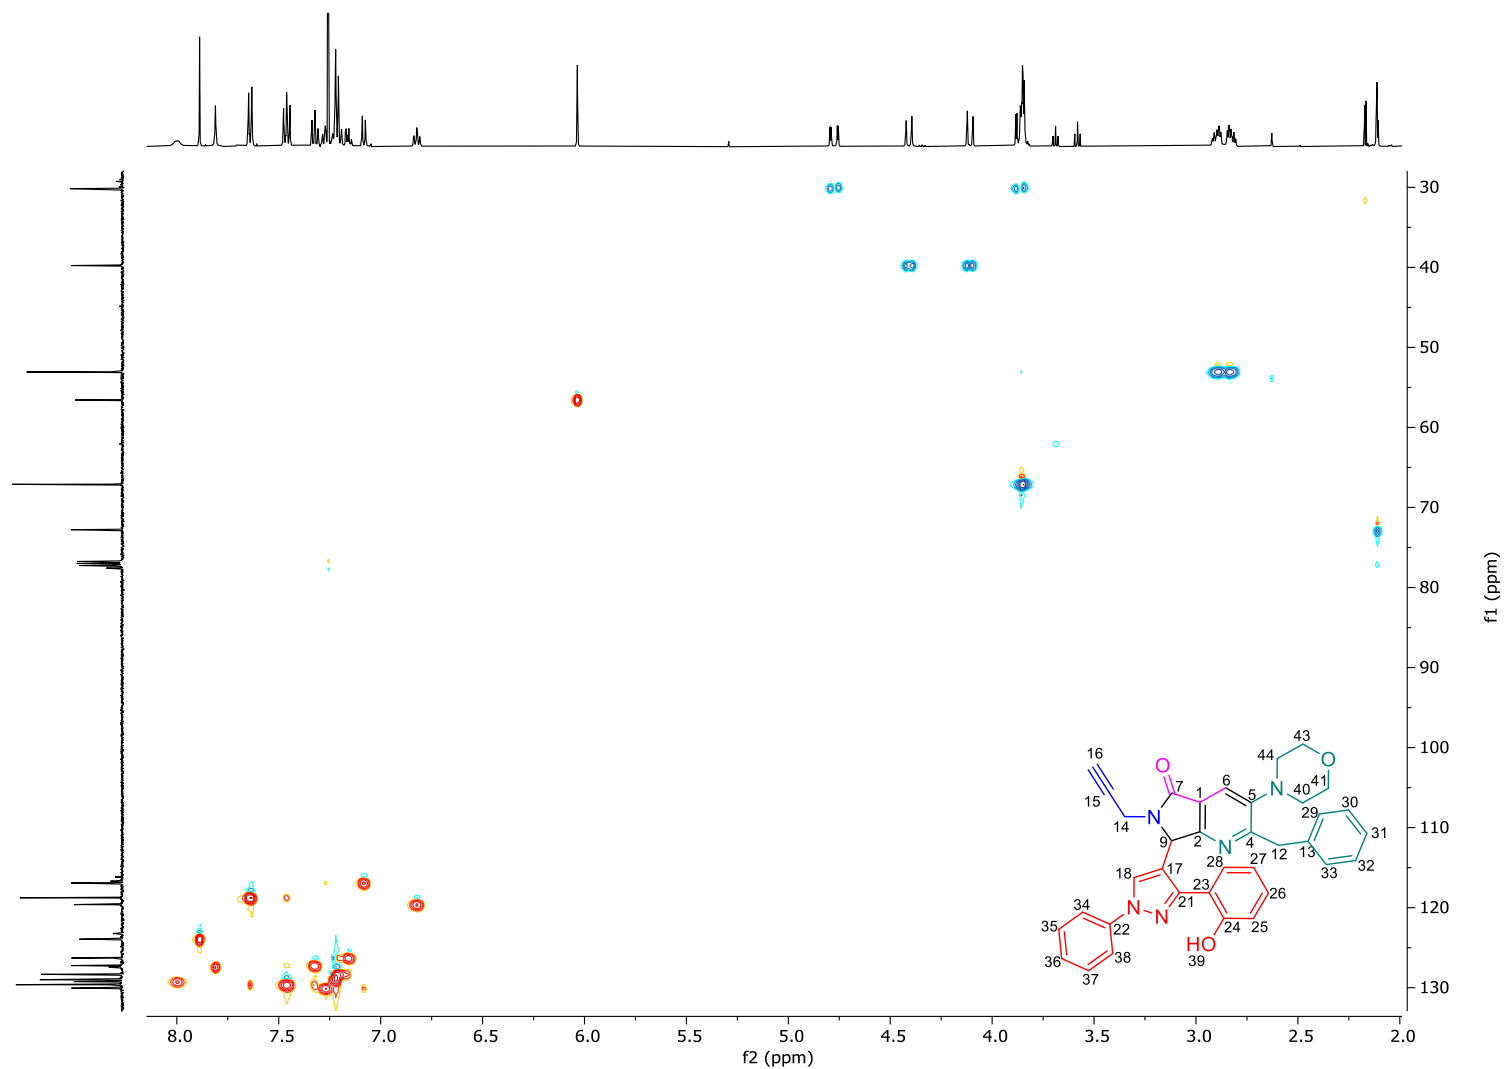

Figure S42. 2D HSQC spectrum of compound **6f**.

2-Benzyl-7-(3-(2-hydroxyphenyl)-1-phenyl-1*H*-pyrazol-4-yl)-3-morpholino-6-(prop-2-yn-1-yl)-6,7-dihydro-5*H*-pyrrolo[3,4-*b*]pyridin-5-one (**6f**).

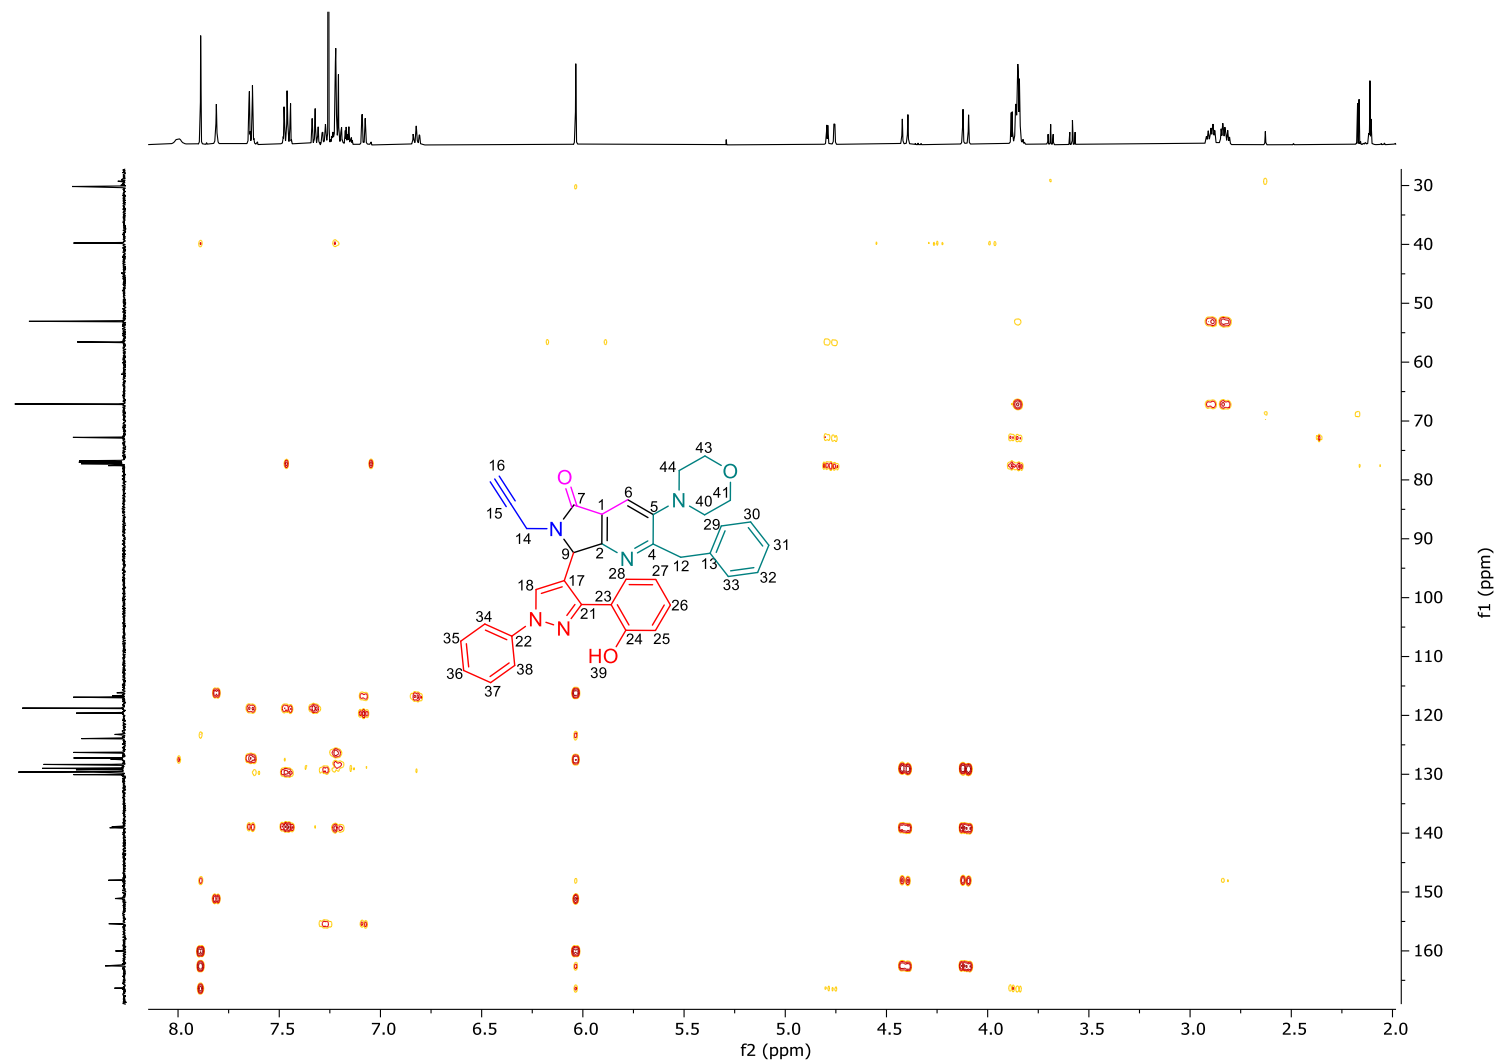

Figure S43. 2D HMBC spectrum of compound **6f**.

HRMS spectra of MOM-protected pyrazole aldehyde **1** and pyrazolyl-pyrrolo[3,4-*b*]pyridin-5-ones **6a-f**.

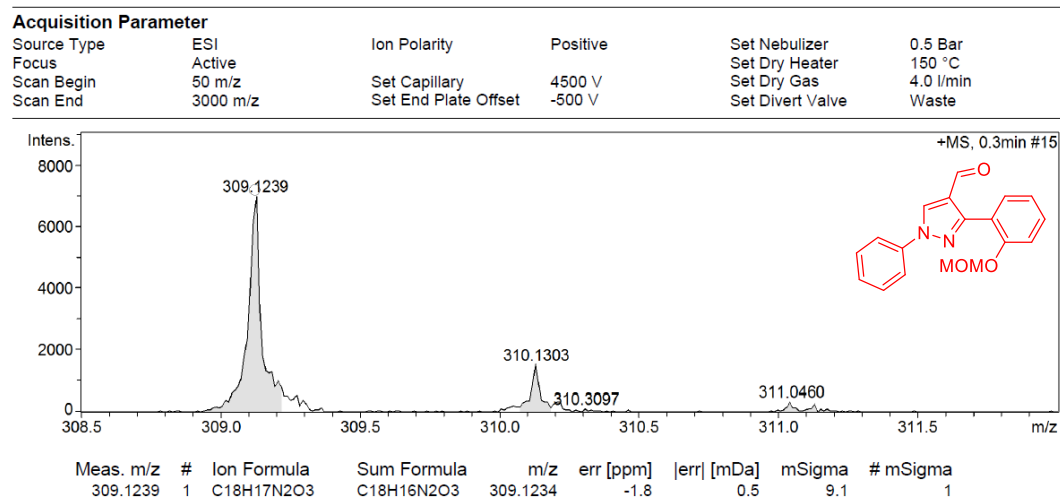

**Figure S44.** HRMS spectrum of 3-(2-Hydroxyphenyl)-1-phenyl-1*H*-pyrazole-4-carbaldehyde.

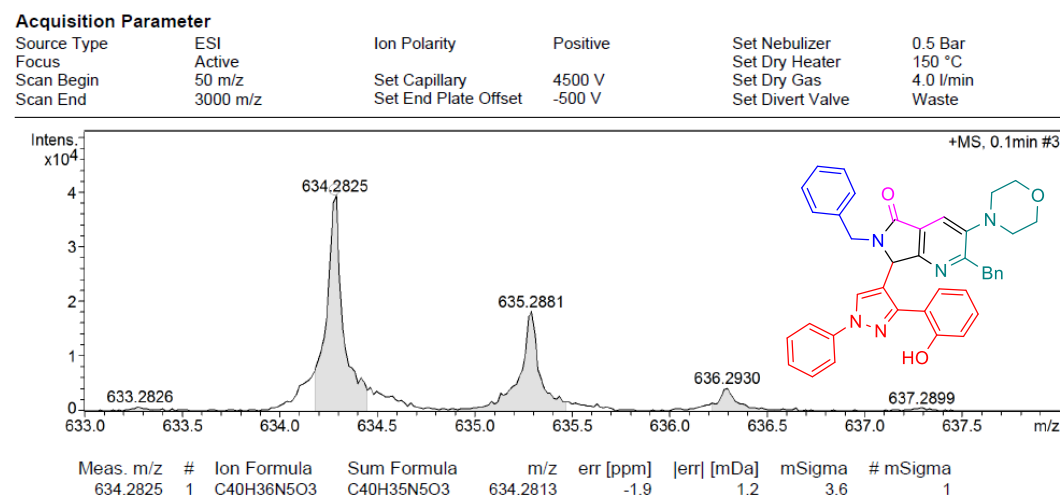

**Figure S45.** HRMS spectrum of 2,6-Dibenzyl-7-(3-(2-hydroxyphenyl)-1-phenyl-1*H*-pyrazol-4-yl)-3-morpholino-6,7-dihydro-5*H*-pyrrolo[3,4-*b*]pyridin-5-one (**6a**).

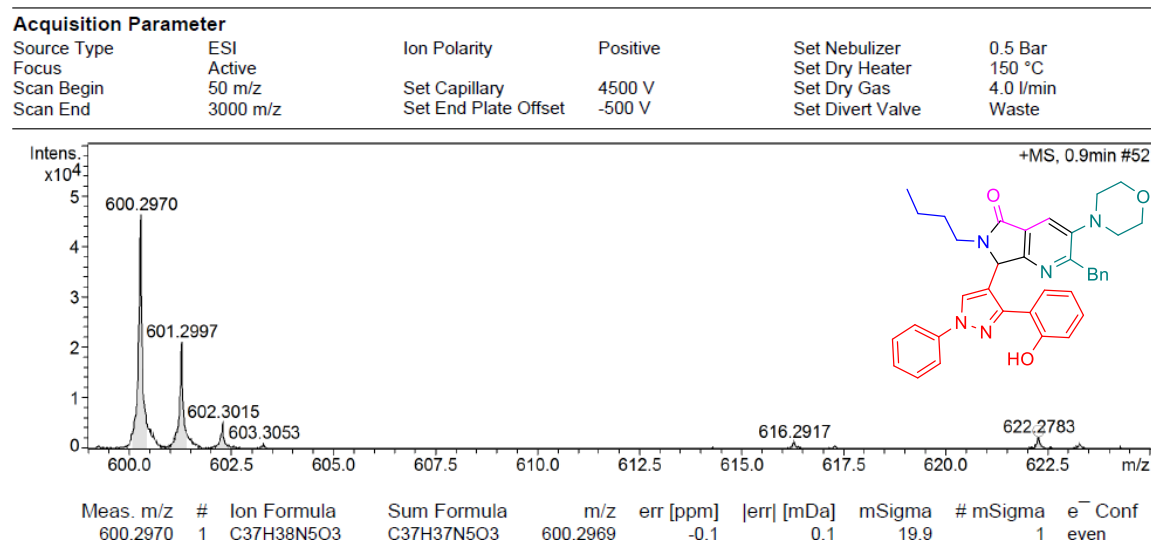

**Figure S46.** HRMS spectrum of 2-Benzyl-6-butyl-7-(3-(2-hydroxyphenyl)-1-phenyl-1*H*-pyrazol-4-yl)-3-morpholino-6,7-dihydro-5*H*-pyrrolo[3,4-*b*]pyridin-5-one (**6b**).

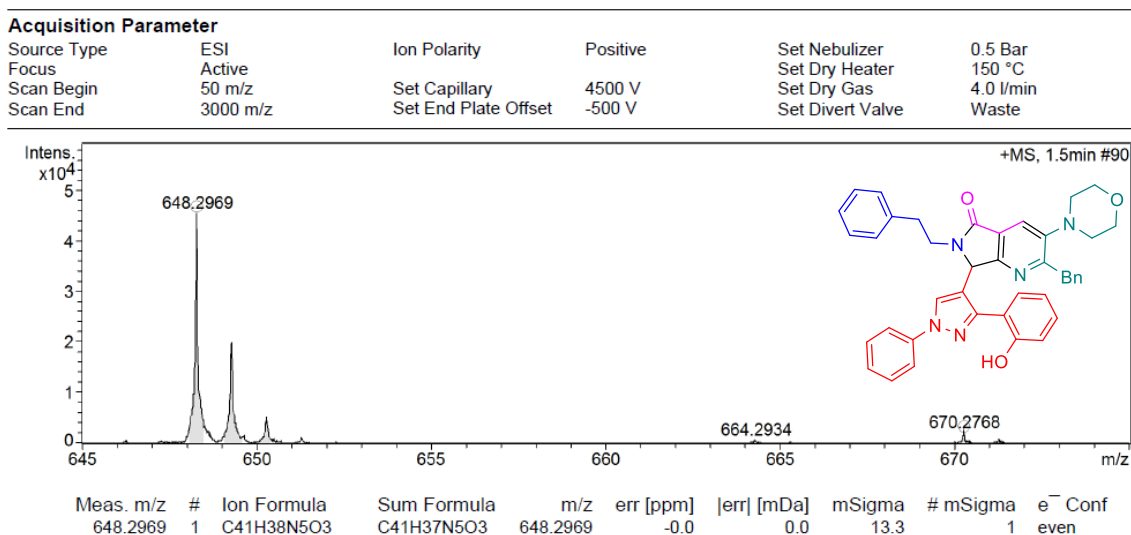

**Figure S47.** HRMS spectrum of 2-Benzyl-7-(3-(2-hydroxyphenyl)-1-phenyl-1*H*-pyrazol-4-yl)-3-morpholino-6-phenethyl-6,7-dihydro-5*H*-pyrrolo[3,4-*b*]pyridin-5-one (**6c**).

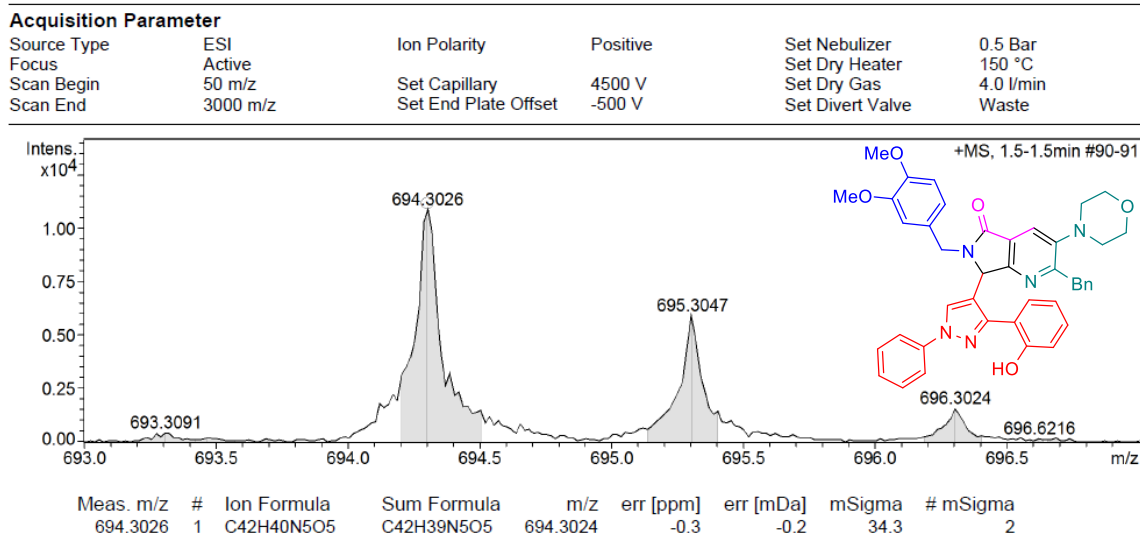

**Figure S48.** HRMS spectrum of 2-Benzyl-6-(3,4-dimethoxybenzyl)-7-(3-(2-hydroxyphenyl)-1-phenyl-1*H*-pyrazol-4-yl)-3-morpholino-6,7-dihydro-5*H*-pyrrolo[3,4-*b*]pyridin-5-one (**6d**).

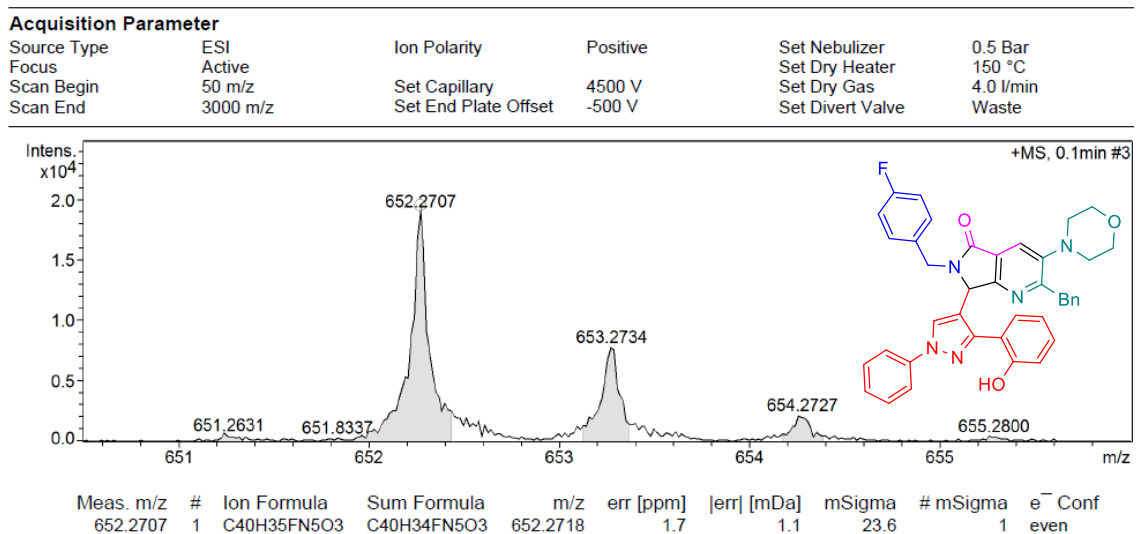

**Figure S49.** HRMS spectrum of 2-Benzyl-6-(4-fluorobenzyl)-7-(3-(2-hydroxyphenyl)-1-phenyl-1*H*-pyrazol-4-yl)-3-morpholino-6,7-dihydro-5*H*-pyrrolo[3,4-*b*]pyridin-5-one (**6e**).



**Acquisition Parameter**

|             |          |                      |          |                  |           |
|-------------|----------|----------------------|----------|------------------|-----------|
| Source Type | ESI      | Ion Polarity         | Positive | Set Nebulizer    | 0.5 Bar   |
| Focus       | Active   |                      |          | Set Dry Heater   | 150 °C    |
| Scan Begin  | 50 m/z   | Set Capillary        | 4500 V   | Set Dry Gas      | 4.0 l/min |
| Scan End    | 3000 m/z | Set End Plate Offset | -500 V   | Set Divert Valve | Waste     |

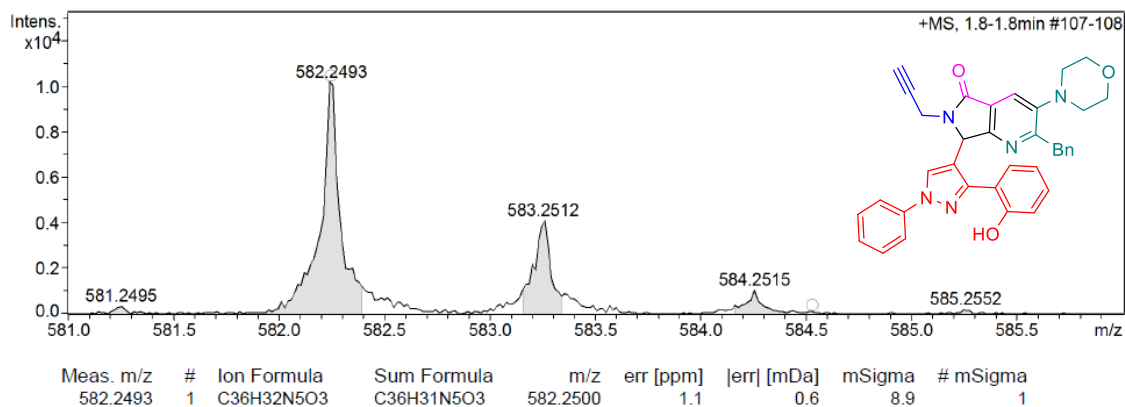

**Figure S50.** HRMS spectrum of 2-Benzyl-7-(3-(2-hydroxyphenyl)-1-phenyl-1*H*-pyrazol-4-yl)-3-morpholino-6-(prop-2-yn-1-yl)-6,7-dihydro-5*H*-pyrrolo[3,4-*b*]pyridin-5-one (**6f**).

Data of DFT and TD-DFT calculations

Optimized xyz coordinates (B3LYP/6-31G(d), SMD, chloroform) and excitation energies and oscillator strengths (B3LYP/6-311+G(d,p)) of compound **6a**.

|     |   |           |           |           |     |   |           |           |           |
|-----|---|-----------|-----------|-----------|-----|---|-----------|-----------|-----------|
| 1.  | C | -3.292123 | -0.820934 | -1.878067 | 43. | N | -4.434312 | -2.127890 | 0.493649  |
| 2.  | C | -3.599913 | 0.586455  | -2.361509 | 44. | C | -5.278373 | -2.155491 | 1.695977  |
| 3.  | C | -2.770299 | 1.234172  | -3.281950 | 45. | C | -6.655879 | -2.692787 | 1.326997  |
| 4.  | C | -3.063476 | 2.524625  | -3.722506 | 46. | O | -6.567542 | -4.000747 | 0.766849  |
| 5.  | C | -4.192495 | 3.188649  | -3.246269 | 47. | C | -5.750230 | -3.998069 | -0.400992 |
| 6.  | C | -5.027175 | 2.552087  | -2.328008 | 48. | C | -4.350090 | -3.477018 | -0.101579 |
| 7.  | C | -4.732485 | 1.262395  | -1.891020 | 49. | H | -4.219949 | -1.386260 | -1.819036 |
| 8.  | C | -2.594598 | -0.848109 | -0.528368 | 50. | H | -2.642319 | -1.317505 | -2.604499 |
| 9.  | C | -3.183591 | -1.460007 | 0.614588  | 51. | H | -1.889427 | 0.724766  | -3.657303 |
| 10. | C | -2.511772 | -1.363629 | 1.838917  | 52. | H | -2.409137 | 3.008446  | -4.439679 |
| 11. | C | -1.291509 | -0.707247 | 1.858486  | 53. | H | -4.422391 | 4.191321  | -3.589648 |
| 12. | C | -0.777506 | -0.189040 | 0.682699  | 54. | H | -5.911194 | 3.058358  | -1.955046 |
| 13. | N | -1.396594 | -0.242082 | -0.486895 | 55. | H | -5.391118 | 0.772152  | -1.181264 |
| 14. | C | 0.581792  | 0.441038  | 0.943916  | 56. | H | -2.920518 | -1.792761 | 2.745271  |
| 15. | N | 0.725478  | 0.212604  | 2.393969  | 57. | H | 0.538680  | 1.516448  | 0.747613  |
| 16. | C | -0.347668 | -0.429566 | 2.968294  | 58. | H | 1.762247  | 0.280698  | 0.157534  |
| 17. | O | -0.478731 | -0.697740 | 4.154825  | 59. | H | 2.774638  | 0.450368  | 2.720412  |
| 18. | C | 1.830004  | 0.756172  | 3.177005  | 60. | H | -0.016912 | 2.287227  | 4.484417  |
| 19. | C | 1.794272  | 2.268115  | 3.318676  | 61. | H | -0.077694 | 4.747481  | 4.713892  |
| 20. | C | 0.760030  | 2.891991  | 4.028312  | 62. | H | 1.704020  | 6.139882  | 0.687349  |
| 21. | C | 0.727469  | 4.277485  | 4.159535  | 63. | H | 3.545334  | 5.050090  | 2.428076  |
| 22. | C | 1.730036  | 5.060563  | 0.584734  | 64. | H | 3.598979  | 2.589553  | 0.193703  |
| 23. | C | 2.763624  | 4.449250  | 2.879837  | 65. | H | 2.045595  | -2.139357 | 1.137161  |
| 24. | C | 2.792810  | 3.060461  | 2.747164  | 66. | H | 4.521789  | -2.305949 | -2.718761 |
| 25. | C | 1.708206  | -0.168373 | 0.144337  | 67. | H | 6.027864  | -4.255321 | -2.992046 |
| 26. | C | 2.437127  | 0.351417  | -0.967241 | 68. | H | 6.495687  | -5.749630 | -1.063347 |
| 27. | N | 3.396752  | -0.510940 | -1.328044 | 69. | H | 5.464851  | -5.262532 | 1.143874  |
| 28. | N | 3.300950  | -1.567028 | -0.490118 | 70. | H | 4.006354  | -3.299049 | 1.429644  |
| 29. | C | 2.290027  | -1.393325 | 0.399683  | 71. | H | 4.295569  | 3.924869  | -3.267707 |
| 30. | C | 4.166521  | -2.687627 | -0.635406 | 72. | H | 2.127807  | 5.138052  | -3.377514 |
| 31. | C | 4.741238  | -2.953135 | -1.880364 | 73. | H | 0.069892  | 4.076474  | 2.449265  |
| 32. | C | 5.582837  | -4.051896 | -2.024690 | 74. | H | 0.212269  | 1.855785  | -1.402118 |
| 33. | C | 5.842999  | -4.892707 | -0.943599 | 75. | H | 4.586296  | 0.706532  | 1.947210  |
| 34. | C | 5.262246  | -4.621058 | 0.293857  | 76. | H | -4.854426 | -2.797035 | 2.485182  |
| 35. | C | 4.429278  | -3.517557 | 0.457055  | 77. | H | -5.373473 | -1.141563 | 2.092276  |
| 36. | C | 2.334146  | 1.640655  | -1.669835 | 78. | H | -7.279466 | -2.776869 | 2.218867  |
| 37. | C | 3.484411  | 2.231187  | 2.252735  | 79. | H | -7.146031 | -2.011440 | 0.616348  |
| 38. | C | 3.394745  | 3.494222  | -2.845714 | 80. | H | -5.701147 | -5.031257 | -0.749968 |
| 39. | C | 2.178871  | 4.163211  | 2.904895  | 81. | H | -6.219042 | -3.384138 | -1.183935 |
| 40. | C | 1.027412  | 3.574311  | -2.380930 | 82. | H | -3.769722 | -3.439483 | -1.024991 |

|       |          |          |           |       |           |           |          |
|-------|----------|----------|-----------|-------|-----------|-----------|----------|
| 41. C | 1.113368 | 2.326980 | 1.773459  | 83. H | -3.840891 | -4.170079 | 0.588088 |
| 42. O | 4.698414 | 1.629287 | -2.258795 |       |           |           |          |

Excited State 3: Singlet-A 4.0029 eV 309.73 nm f=0.3633 <S\*\*2>=0.000

|            |          |
|------------|----------|
| 166 -> 169 | -0.12827 |
| 167 -> 168 | -0.10562 |
| 167 -> 169 | 0.67788  |

Excited State 8: Singlet-A 4.5215 eV 274.21 nm f=0.1919 <S\*\*2>=0.000

|            |          |
|------------|----------|
| 158 -> 168 | 0.10780  |
| 159 -> 168 | -0.14252 |
| 161 -> 168 | -0.12465 |
| 162 -> 168 | -0.12101 |
| 163 -> 168 | -0.30719 |
| 164 -> 168 | 0.37373  |
| 165 -> 169 | 0.34838  |
| 167 -> 171 | 0.16776  |

Optimized xyz coordinates (B3LYP/6-31G(d), SMD, chloroform) and excitation energies and oscillator strengths (B3LYP/6-311+G(d,p)) of compound **6b**.

|       |           |           |           |       |           |           |           |
|-------|-----------|-----------|-----------|-------|-----------|-----------|-----------|
| 1. C  | -3.380417 | -0.783791 | -1.784071 | 42. C | -4.496648 | -3.233812 | 0.206835  |
| 2. C  | -3.609783 | 0.599097  | -2.369841 | 43. H | -4.344165 | -1.265665 | -1.632372 |
| 3. C  | -2.802569 | 1.095312  | -3.397699 | 44. H | -2.811271 | -1.388168 | -2.496570 |
| 4. C  | -3.027196 | 2.363947  | -3.932515 | 45. H | -1.993641 | 0.484432  | -3.783347 |
| 5. C  | -4.063032 | 3.157777  | -3.443547 | 46. H | -2.391778 | 2.729614  | -4.731963 |
| 6. C  | -4.874907 | 2.672722  | -2.418348 | 47. H | -4.239693 | 4.143295  | -3.860346 |
| 7. C  | -4.649482 | 1.404352  | -1.888094 | 48. H | -5.687333 | 3.280558  | -2.034473 |
| 8. C  | -2.618946 | -0.756562 | -0.469327 | 49. H | -5.291070 | 1.031505  | -1.096112 |
| 9. C  | -3.190586 | -1.244267 | 0.740961  | 50. H | -2.855841 | -1.416267 | 2.881972  |
| 10. C | -2.463217 | -1.089497 | 1.927177  | 51. H | 0.699807  | 1.499916  | 0.492436  |
| 11. C | -1.207934 | -0.508558 | 1.845360  | 52. H | 2.044957  | 0.421672  | 3.918559  |
| 12. C | -0.714412 | -0.119704 | 0.612303  | 53. H | 2.944266  | 0.574683  | 2.406523  |
| 13. N | -1.387350 | -0.223698 | -0.524301 | 54. H | 2.054170  | -2.183597 | 1.120837  |
| 14. C | 0.690143  | 0.442334  | 0.772075  | 55. H | 4.337022  | -2.816996 | -2.791471 |
| 15. N | 0.883822  | 0.317516  | 2.228896  | 56. H | 5.790724  | -4.821408 | -2.915716 |
| 16. C | -0.202928 | -0.200283 | 2.892372  | 57. H | 6.333248  | -6.097654 | -0.854874 |
| 17. O | -0.302784 | -0.360486 | 4.101519  | 58. H | 5.431375  | -5.339134 | 1.331971  |
| 18. C | 2.032532  | 0.880754  | 2.928131  | 59. H | 4.024601  | -3.317183 | 1.463261  |

|     |   |           |           |           |     |   |           |           |           |
|-----|---|-----------|-----------|-----------|-----|---|-----------|-----------|-----------|
| 19. | C | 1.748322  | -0.286565 | -0.020641 | 60. | H | 4.346974  | 3.387235  | -3.875394 |
| 20. | C | 2.448578  | 0.106921  | -1.200738 | 61. | H | 2.238436  | 4.702058  | -3.968033 |
| 21. | N | 3.356090  | -0.823663 | -1.525955 | 62. | H | 0.184991  | 3.822800  | -2.856714 |
| 22. | N | 3.254767  | 0.800218  | -0.597547 | 63. | H | 0.277165  | 1.681707  | -1.648538 |
| 23. | C | 2.291312  | -1.510348 | 0.313868  | 64. | H | 4.554587  | 0.269758  | -2.316499 |
| 24. | C | 4.084565  | -2.954459 | -0.662933 | 65. | H | -4.846369 | -2.378816 | 2.760969  |
| 25. | C | 4.587882  | -3.371241 | -1.896913 | 66. | H | -5.285268 | -0.718469 | 2.294921  |
| 26. | C | 5.400608  | -4.499220 | -1.956939 | 67. | H | -7.275830 | -2.225861 | 2.595681  |
| 27. | C | 5.703184  | -5.217444 | -0.800906 | 68. | H | -7.169478 | -1.560304 | 0.946944  |
| 28. | C | 5.193582  | -4.794224 | 0.425500  | 69. | H | -5.962268 | -4.736926 | -0.294775 |
| 29. | C | 4.390881  | -3.659595 | 0.503166  | 70. | H | -6.399660 | -3.088871 | -0.806979 |
| 30. | C | 2.368664  | 1.338665  | -2.002348 | 71. | H | -3.953349 | -3.289997 | -0.737982 |
| 31. | C | 3.512180  | 1.820928  | -2.689683 | 72. | H | -4.002422 | -3.913414 | 0.920333  |
| 32. | C | 3.450976  | 3.038253  | -3.374973 | 73. | C | 1.982750  | 2.408783  | 3.058531  |
| 33. | C | 2.267858  | 3.764366  | -3.423783 | 74. | H | 1.055442  | 2.688598  | 3.571135  |
| 34. | C | 1.119770  | 3.278410  | -2.796755 | 75. | H | 1.945067  | 2.861002  | 2.060708  |
| 35. | C | 1.178468  | 2.077829  | -2.098634 | 76. | C | 3.185570  | 2.968189  | 3.826331  |
| 36. | O | 4.692566  | 1.156951  | -2.711430 | 77. | H | 4.111162  | 2.677176  | 3.314915  |
| 37. | N | -4.477885 | -1.848541 | 0.719176  | 78. | H | 3.224610  | 2.506904  | 4.820469  |
| 38. | C | -5.267238 | -1.756730 | 1.954701  | 79. | C | 3.144273  | 4.490824  | 3.974309  |
| 39. | C | -6.688891 | -2.229434 | 1.675341  | 80. | H | 4.006025  | 4.858530  | 4.539307  |
| 40. | O | -6.702563 | -3.569723 | 1.189440  | 81. | H | 3.152616  | 4.985951  | 2.997839  |
| 41. | C | -5.936114 | -3.684241 | -0.006650 | 82. | H | 2.240666  | 4.813350  | 4.501706  |

Excited State 3: Singlet-A 4.0240 eV 308.11 nm f=0.3435 <S\*\*2>=0.000

158 -> 161 0.16923

159 -> 160 -0.15351

159 -> 161 0.65550

Excited State 8: Singlet-A 4.5368 eV 273.28 nm f=0.2473 <S\*\*2>=0.000

153 -> 160 -0.13950

154 -> 160 -0.10247

156 -> 160 0.45216

157 -> 161 0.38565

159 -> 163 0.20545

159 -> 164 -0.12423

Optimized xyz coordinates (B3LYP/6-31G(d), SMD, chloroform) and excitation energies and oscillator strengths (B3LYP/6-311+G(d,p)) of compound **6c**.

|     |   |           |           |           |     |   |           |           |           |
|-----|---|-----------|-----------|-----------|-----|---|-----------|-----------|-----------|
| 1.  | C | -3.428725 | -0.921770 | -1.761763 | 44. | H | -2.867959 | -1.569469 | -2.442068 |
| 2.  | C | -3.710100 | 0.402973  | -2.450439 | 45. | H | -2.087310 | 0.244152  | -3.852447 |
| 3.  | C | -2.921577 | 0.849432  | -3.515173 | 46. | H | -2.576591 | 2.387945  | -4.975619 |
| 4.  | C | -3.197403 | 2.061270  | -4.148348 | 47. | H | -4.484125 | 3.788046  | -4.216911 |
| 5.  | C | -4.267052 | 2.847119  | -3.723240 | 48. | H | -5.898654 | 3.013154  | -2.327240 |
| 6.  | C | -5.060228 | 2.411612  | -2.661963 | 49. | H | -5.410406 | 0.864224  | -1.212979 |
| 7.  | C | -4.783402 | 1.199700  | -2.032850 | 50. | H | -2.722876 | -1.199017 | 2.915613  |
| 8.  | C | -2.624864 | -0.777272 | -0.480409 | 51. | H | 0.691321  | 1.582462  | 0.200600  |
| 9.  | C | -3.146443 | -1.173172 | 0.784336  | 52. | H | 2.275338  | 0.633089  | 3.581029  |
| 10. | C | -2.371432 | -0.935577 | 1.925648  | 53. | H | 3.030284  | 0.831435  | 1.997419  |
| 11. | C | -1.124262 | -0.356766 | 1.752915  | 54. | H | 2.153693  | -2.028968 | 0.972231  |
| 12. | C | -0.687202 | -0.046947 | 0.476748  | 55. | H | 4.300040  | -2.804894 | -3.008172 |
| 13. | N | -1.402245 | -0.239287 | -0.621505 | 56. | H | 5.787697  | -4.785003 | -3.100366 |
| 14. | C | 0.714189  | 0.541826  | 0.538002  | 57. | H | 6.415897  | -5.971172 | -1.009688 |
| 15. | N | 0.976052  | 0.501340  | 1.989586  | 58. | H | 5.565125  | -5.144437 | 1.173057  |
| 16. | C | -0.076998 | 0.021413  | 2.732941  | 59. | H | 4.123145  | -3.147638 | 1.269973  |
| 17. | O | -0.118265 | -0.062195 | 3.952758  | 60. | H | 4.103480  | 3.296494  | -4.413727 |
| 18. | C | 2.156770  | 1.093961  | 2.599124  | 61. | H | 1.963607  | 4.560658  | -4.495044 |
| 19. | C | 1.748877  | -0.211283 | -0.262053 | 62. | H | -0.026186 | 3.700432  | -3.260697 |
| 20. | C | 2.384306  | 0.128600  | -1.494438 | 63. | H | 0.158450  | 1.630746  | -1.945129 |
| 21. | N | 3.296050  | -0.800917 | -1.809836 | 64. | H | 4.439168  | 0.271358  | -2.704765 |
| 22. | N | 3.261171  | -1.724688 | -0.824351 | 65. | H | -4.740433 | -2.098620 | 2.956795  |
| 23. | C | 2.335713  | -1.402185 | 0.115095  | 66. | H | -5.182400 | -0.486634 | 2.347073  |
| 24. | C | 4.112745  | -2.864245 | -0.869294 | 67. | H | -7.171888 | -1.939964 | 2.855068  |
| 25. | C | 4.587447  | -3.319409 | -2.101212 | 68. | H | -7.116188 | -1.433627 | 1.148225  |
| 26. | C | 5.419655  | -4.433925 | -2.143029 | 69. | H | -5.974213 | -4.723532 | 0.171006  |
| 27. | C | 5.770685  | -5.101194 | -0.970323 | 70. | H | -6.417375 | -3.125952 | -0.477903 |
| 28. | C | 5.290444  | -4.639567 | 0.253941  | 71. | H | -3.972059 | -3.339685 | -0.474923 |
| 29. | C | 4.468396  | -3.517715 | 0.312732  | 72. | H | -3.964863 | -3.811303 | 1.233246  |
| 30. | C | 2.244102  | 1.312726  | -2.357674 | 73. | C | 2.060890  | 2.627941  | 2.753023  |
| 31. | C | 3.349377  | 1.779892  | 3.114832  | 74. | H | 1.197460  | 2.861189  | 3.382163  |
| 32. | C | 3.235264  | 2.957490  | -3.860272 | 75. | H | 1.883682  | 3.077483  | 1.771592  |
| 33. | C | 2.034901  | 3.655076  | -3.902499 | 76. | C | 3.317481  | 3.206530  | 3.362438  |
| 34. | C | 0.922400  | 3.179833  | -3.206949 | 77. | C | 3.443676  | 3.341422  | 4.750174  |
| 35. | C | 1.034059  | 2.019929  | -2.448936 | 78. | C | 4.399262  | 3.580422  | 2.555695  |
| 36. | O | 4.542583  | 1.140007  | -3.148416 | 79. | C | 4.617079  | 3.836500  | 5.316873  |
| 37. | N | -4.436038 | -1.768850 | 0.861485  | 80. | H | 2.612743  | 3.060620  | 5.389946  |
| 38. | C | -5.182554 | -1.552932 | 2.107767  | 81. | C | 5.574472  | 4.075024  | 3.118742  |
| 39. | C | -6.615909 | -2.035876 | 1.920564  | 82. | H | 4.317637  | 3.487921  | 1.477013  |
| 40. | O | -6.654159 | -3.415804 | 1.563714  | 83. | C | 5.687417  | 4.203830  | 4.502393  |
| 41. | C | -5.930168 | -3.648959 | 0.358097  | 84. | H | 4.694069  | 3.938858  | 6.394052  |
| 42. | C | -4.480984 | -3.194320 | 0.479439  | 85. | H | 6.399892  | 4.363197  | 2.476588  |
| 43. | H | -4.375404 | -1.410208 | -1.540742 | 86. | H | 6.600099  | 4.590990  | 4.941867  |

Excited State 3: Singlet-A 4.0168 eV 308.66 nm f=0.3607 <S\*\*2>=0.000

170 -> 173 0.15638

171 -> 172 0.12632

171 -> 173 0.66685

Excited State 8: Singlet-A 4.5110 eV 274.85 nm f=0.2600 <S\*\*2>=0.000

162 -> 172 0.11571

163 -> 172 -0.26825

166 -> 172 -0.11133

167 -> 172 -0.21266

168 -> 172 0.46892

169 -> 173 0.23650

170 -> 174 -0.10923

171 -> 175 0.12545

Optimized xyz coordinates (B3LYP/6-31G(d), SMD, chloroform) and excitation energies and oscillator strengths (B3LYP/6-311+G(d,p)) of compound **6d**.

|     |   |           |           |           |     |   |           |           |           |
|-----|---|-----------|-----------|-----------|-----|---|-----------|-----------|-----------|
| 1.  | C | -3.301499 | -0.628823 | -1.717893 | 47. | C | -5.977839 | -3.627390 | -0.327714 |
| 2.  | C | -3.537628 | 0.811306  | -2.140837 | 48. | C | -4.531139 | -3.249170 | -0.035426 |
| 3.  | C | -2.759350 | 1.413239  | -3.133647 | 49. | H | -4.261065 | -1.138779 | -1.661267 |
| 4.  | C | -2.995923 | 2.731826  | -3.523666 | 50. | H | -2.697313 | -1.133764 | -2.476991 |
| 5.  | C | -4.014151 | 3.468994  | -2.922439 | 51. | H | -1.963986 | 0.846790  | -3.605972 |
| 6.  | C | -4.795792 | 2.878630  | -1.929179 | 52. | H | -2.383581 | 3.181077  | -4.298132 |
| 7.  | C | -4.558734 | 1.561391  | -1.543675 | 53. | H | -4.199617 | 4.493438  | -3.226062 |
| 8.  | C | -2.582501 | -0.749099 | -0.385546 | 54. | H | -5.592981 | 3.443178  | -1.457465 |
| 9.  | C | -3.189051 | -1.362206 | 0.747974  | 55. | H | -5.175020 | 1.106154  | -0.775080 |
| 10. | C | -2.489492 | -1.351235 | 1.960896  | 56. | H | -2.907924 | -1.782427 | 2.861685  |
| 11. | C | -1.231251 | -0.770918 | 1.978098  | 57. | H | 0.705769  | 1.381728  | 0.911949  |
| 12. | C | -0.707922 | -0.241889 | 0.811197  | 58. | H | 1.928123  | -0.030354 | 4.245331  |
| 13. | N | -1.349227 | -0.218373 | -0.347577 | 59. | H | 2.905164  | 0.197501  | 2.791494  |
| 14. | C | 0.689532  | 0.299072  | 1.068812  | 60. | H | 0.295263  | 1.980739  | 4.879208  |
| 15. | N | 0.845914  | 0.009455  | 2.506015  | 61. | H | 3.597863  | 4.822527  | 2.539980  |
| 16. | C | -0.254218 | -0.585956 | 3.078919  | 62. | H | 3.639132  | 2.393394  | 2.207913  |
| 17. | O | -0.382495 | -0.884544 | 4.258598  | 63. | H | 2.055102  | -2.340015 | 1.186567  |
| 18. | C | 1.979462  | 0.495134  | 3.290162  | 64. | H | 4.407596  | -2.563510 | -2.737989 |
| 19. | C | 1.972855  | 1.996401  | 3.506413  | 65. | H | 5.854807  | -4.549081 | -3.061944 |
| 20. | C | 1.029202  | 2.587274  | 4.359548  | 66. | H | 6.356307  | -6.052100 | -1.148382 |
| 21. | C | 0.993143  | 3.959115  | 4.559121  | 67. | H | 5.419183  | -5.537833 | 1.094138  |

|     |   |           |           |           |     |   |           |           |           |
|-----|---|-----------|-----------|-----------|-----|---|-----------|-----------|-----------|
| 22. | C | 1.925921  | 4.790991  | 3.897025  | 68. | H | 4.019752  | -3.537932 | 1.428657  |
| 23. | C | 2.876035  | 4.207232  | 3.060257  | 69. | H | 4.421090  | 3.690204  | -3.207882 |
| 24. | C | 2.894650  | 2.822373  | 2.870303  | 70. | H | 2.300101  | 4.989441  | -3.239294 |
| 25. | C | 1.767347  | -0.343351 | 0.229036  | 71. | H | 0.230086  | 3.998303  | -2.261834 |
| 26. | C | 2.487272  | 0.164485  | -0.894235 | 72. | H | 0.314486  | 1.759637  | -1.246919 |
| 27. | N | 3.402377  | -0.729148 | -1.292558 | 73. | H | 4.619626  | 0.446377  | -1.929998 |
| 28. | N | 3.287183  | -1.793007 | -0.467233 | 74. | H | -4.917373 | -2.681552 | 2.594701  |
| 29. | C | 2.306829  | -1.594094 | 0.451174  | 75. | H | -5.297864 | -0.966699 | 2.312190  |
| 30. | C | 4.115648  | -2.937026 | -0.642994 | 76. | H | -7.336624 | -2.437806 | 2.398272  |
| 31. | C | 4.639960  | -3.216118 | -1.907187 | 77. | H | -7.173011 | -1.590898 | 0.839589  |
| 32. | C | 5.449352  | -4.334759 | -2.079672 | 78. | H | -6.028255 | -4.638041 | -0.737577 |
| 33. | C | 5.728922  | -5.179752 | -1.006591 | 79. | H | -6.404973 | -2.928112 | -1.061445 |
| 34. | C | 5.199994  | -4.893226 | 0.250617  | 80. | H | -3.969875 | -3.212227 | -0.970476 |
| 35. | C | 4.400313  | -3.769681 | 0.441679  | 81. | H | -4.072195 | -4.022337 | 0.602501  |
| 36. | C | 2.417360  | 1.466524  | -1.577231 | 82. | O | 1.807093  | 6.126740  | 4.126646  |
| 37. | C | 3.573160  | 2.017614  | -2.187956 | 83. | O | 0.004962  | 4.488614  | 5.352657  |
| 38. | C | 3.516640  | 3.290575  | -2.763542 | 84. | C | 0.435258  | 5.060916  | 6.597056  |
| 39. | C | 2.326672  | 4.007499  | -2.779468 | 85. | H | 1.077095  | 5.930063  | 6.437680  |
| 40. | C | 1.168676  | 3.458398  | -2.227524 | 86. | H | -0.471737 | 5.370021  | 7.117561  |
| 41. | C | 1.222295  | 2.200682  | -1.638188 | 87. | H | 0.963548  | 4.316790  | 7.203425  |
| 42. | O | 4.761231  | 1.367463  | -2.235293 | 88. | C | 2.689378  | 7.015220  | 3.440503  |
| 43. | N | -4.486151 | -1.933900 | 0.633991  | 89. | H | 2.570585  | 6.934126  | 2.355501  |
| 44. | C | -5.301083 | -1.959552 | 1.855788  | 90. | H | 2.405759  | 8.017150  | 3.759915  |
| 45. | C | -6.728684 | -2.353524 | 1.495595  | 91. | H | 3.734213  | 6.832674  | 3.712152  |
| 46. | O | -6.768317 | -3.628256 | 0.858133  |     |   |           |           |           |

Excited State 4: Singlet-A 4.0169 eV 308.66 nm f=0.3226 <S\*\*2>=0.000

182 -> 184 -0.21617

182 -> 185 0.21539

183 -> 184 -0.10953

183 -> 185 0.60959

Excited State 10: Singlet-A 4.5266 eV 273.90 nm f=0.1929 <S\*\*2>=0.000

174 -> 184 0.10920

175 -> 184 -0.18817

176 -> 184 -0.12277

178 -> 184 -0.17449

179 -> 184 0.48914

180 -> 185 0.29890

183 -> 187 0.14006

Optimized xyz coordinates (B3LYP/6-31G(d), SMD, chloroform) and excitation energies and oscillator strengths (B3LYP/6-311+G(d,p)) of compound **6e**.

|     |   |           |           |           |     |   |           |           |           |
|-----|---|-----------|-----------|-----------|-----|---|-----------|-----------|-----------|
| 1.  | C | -3.442456 | -0.803374 | -1.714644 | 43. | N | -4.548755 | -1.895876 | 0.767006  |
| 2.  | C | -3.552429 | 0.557156  | -2.378974 | 44. | C | -5.337197 | -1.844012 | 2.005033  |
| 3.  | C | -2.755913 | 0.895823  | -3.476183 | 45. | C | -6.759530 | -2.306756 | 1.712162  |
| 4.  | C | -2.876298 | 2.143536  | -4.088327 | 46. | O | -6.774781 | -3.630351 | 1.182766  |
| 5.  | C | -3.794023 | 3.074648  | -3.605823 | 47. | C | -6.011539 | -3.703990 | -0.018550 |
| 6.  | C | -4.593205 | 2.748069  | -2.510055 | 48. | C | -4.571001 | -3.262063 | 0.206244  |
| 7.  | C | -4.472189 | 1.500314  | -1.903132 | 49. | H | -4.443789 | -1.195095 | -1.541566 |
| 8.  | C | -2.689130 | -0.778146 | -0.396021 | 50. | H | -2.929570 | -1.494183 | -2.391206 |
| 9.  | C | -3.265766 | -1.287402 | 0.804017  | 51. | H | -2.036945 | 0.177595  | -3.855607 |
| 10. | C | -2.548107 | -1.141119 | 1.997324  | 52. | H | -2.249875 | 2.387138  | -4.939635 |
| 11. | C | -1.296690 | -0.549419 | 1.931049  | 53. | H | -3.889608 | 4.044752  | -4.081195 |
| 12. | C | -0.797152 | -0.140689 | 0.706720  | 54. | H | -5.313487 | 3.464647  | -2.129783 |
| 13. | N | -1.461599 | -0.235598 | -0.435273 | 55. | H | -5.102490 | 1.251805  | -1.054970 |
| 14. | C | 0.599419  | 0.436015  | 0.882521  | 56. | H | -2.944235 | -1.483656 | 2.945066  |
| 15. | N | 0.786711  | 0.282670  | 2.338371  | 57. | H | 0.596220  | 1.500165  | 0.627144  |
| 16. | C | -0.300399 | -0.254424 | 2.988299  | 58. | H | 1.935258  | 0.346113  | 4.034679  |
| 17. | O | -0.403850 | -0.433170 | 4.194548  | 59. | H | 2.850682  | 0.510950  | 2.534299  |
| 18. | C | 1.940374  | 0.821236  | 3.052235  | 60. | H | 0.282884  | 2.339913  | 4.601767  |
| 19. | C | 1.919390  | 2.332399  | 3.200093  | 61. | H | 0.244658  | 4.820317  | 4.843983  |
| 20. | C | 0.988091  | 2.948508  | 4.046600  | 62. | H | 3.505930  | 5.152305  | 2.091980  |
| 21. | C | 0.957353  | 4.332001  | 4.190302  | 63. | H | 3.553219  | 2.674460  | 1.840714  |
| 22. | C | 1.872982  | 5.091826  | 3.476960  | 64. | H | 1.974692  | -2.194016 | 1.156270  |
| 23. | C | 2.809799  | 4.522360  | 2.632323  | 65. | H | 4.481970  | -2.546206 | -2.695153 |
| 24. | C | 2.824023  | 3.133962  | 2.499194  | 66. | H | 5.979000  | -4.510500 | -2.874294 |
| 25. | C | 1.674016  | -0.258978 | 0.082165  | 67. | H | 6.383986  | -5.956022 | -0.893959 |
| 26. | C | 2.396681  | 0.188500  | -1.064628 | 68. | H | 5.295896  | -5.402753 | 1.270037  |
| 27. | N | 3.323835  | -0.716354 | -1.403419 | 69. | H | 3.848158  | -3.423014 | 1.464494  |
| 28. | N | 3.213347  | -1.731480 | -0.517676 | 70. | H | 4.291850  | 3.594276  | -3.580230 |
| 29. | C | 2.224097  | -1.489258 | 0.380705  | 71. | H | 2.147288  | 4.845101  | -3.723064 |
| 30. | C | 4.064748  | -2.868454 | -0.612369 | 72. | H | 0.083619  | 3.878390  | -2.708809 |
| 31. | C | 4.671816  | -3.171525 | -1.833497 | 73. | H | 0.198083  | 1.713787  | -1.545403 |
| 32. | C | 5.508649  | -4.279522 | -1.925287 | 74. | H | 4.536830  | 0.445019  | -2.096070 |
| 33. | C | 5.734184  | -5.092181 | -0.815373 | 75. | H | -4.914909 | -2.491496 | 2.790369  |
| 34. | C | 5.121274  | -4.783498 | 0.397644  | 76. | H | -5.355028 | -0.817358 | 2.378572  |
| 35. | C | 4.293285  | -3.669872 | 0.508923  | 77. | H | -7.345240 | -2.332352 | 2.632943  |
| 36. | C | 2.311045  | 1.443553  | -1.828489 | 78. | H | -7.240459 | -1.614034 | 1.006402  |
| 37. | C | 3.463329  | 1.976635  | -2.460886 | 79. | H | -6.039682 | -4.745882 | -0.343293 |
| 38. | C | 3.389837  | 3.207085  | -3.120329 | 80. | H | -6.476761 | -3.080225 | -0.795786 |



|     |   |          |          |           |     |   |           |           |           |
|-----|---|----------|----------|-----------|-----|---|-----------|-----------|-----------|
| 39. | C | 2.186500 | 3.896773 | -3.198290 | 81. | H | -4.031836 | -3.285477 | -0.741907 |
| 40. | C | 1.032128 | 3.361817 | -2.625202 | 82. | H | -4.075220 | -3.966503 | 0.893861  |
| 41. | C | 1.102454 | 2.147339 | -1.952805 | 83. | F | 1.848873  | 6.443035  | 3.615349  |
| 42. | O | 4.664636 | 1.349052 | -2.452252 |     |   |           |           |           |

Excited State 3: Singlet-A 3.9935 eV 310.47 nm f=0.3467 <S\*\*2>=0.000

170 -> 173 0.15955

171 -> 172 -0.13238

171 -> 173 0.66472

Excited State 8: Singlet-A 4.5030 eV 275.34 nm f=0.1855 <S\*\*2>=0.000

167 -> 172 -0.31985

168 -> 172 0.47294

169 -> 173 0.28140

170 -> 174 0.10234

171 -> 175 -0.13508

Optimized xyz coordinates (B3LYP/6-31G(d), SMD, chloroform) and excitation energies and oscillator strengths (B3LYP/6-311+G(d,p)) of compound **6f**.

|     |   |           |           |           |     |   |           |           |           |
|-----|---|-----------|-----------|-----------|-----|---|-----------|-----------|-----------|
| 1.  | C | -3.402168 | -0.819848 | -1.746133 | 39. | C | -6.716377 | -2.279171 | 1.705770  |
| 2.  | C | -3.540179 | 0.528017  | -2.430957 | 40. | O | -6.702801 | -3.622165 | 1.227990  |
| 3.  | C | -2.695578 | 0.899417  | -3.480731 | 41. | C | -5.932365 | -3.728131 | 0.033693  |
| 4.  | C | -2.837179 | 2.137924  | -4.106532 | 42. | C | -4.502271 | -3.246770 | 0.245893  |
| 5.  | C | -3.826831 | 3.025549  | -3.688015 | 43. | H | -4.394295 | -1.233525 | -1.572266 |
| 6.  | C | -4.674867 | 2.665527  | -2.640775 | 44. | H | -2.866631 | -1.508360 | -2.407316 |
| 7.  | C | -4.532145 | 1.426818  | -2.019573 | 45. | H | -1.921497 | 0.215256  | -3.811039 |
| 8.  | C | -2.656673 | -0.750842 | -0.424423 | 46. | H | -2.173175 | 2.407298  | -4.920747 |
| 9.  | C | -3.233508 | -1.235488 | 0.785276  | 47. | H | -3.939247 | 3.987831  | -4.175439 |
| 10. | C | -2.521957 | -1.054497 | 1.977080  | 48. | H | -5.451129 | 3.347705  | -2.310764 |
| 11. | C | -1.278250 | -0.447494 | 1.902617  | 49. | H | -5.200255 | 1.151426  | -1.209587 |
| 12. | C | -0.780376 | -0.057835 | 0.671079  | 50. | H | -2.916764 | -1.381986 | 2.930610  |
| 13. | N | -1.437255 | -0.191075 | -0.471299 | 51. | H | 0.607715  | 1.590597  | 0.558114  |
| 14. | C | 0.612901  | 0.531847  | 0.833566  | 52. | H | 1.877374  | 0.618370  | 4.026134  |
| 15. | N | 0.798071  | 0.407409  | 2.291310  | 53. | H | 2.862147  | 0.639425  | 2.560582  |
| 16. | C | -0.289399 | -0.119971 | 2.956283  | 54. | H | 1.981386  | -2.078360 | 1.198704  |
| 17. | O | -0.385504 | -0.274050 | 4.163786  | 55. | H | 4.382238  | -2.644685 | -2.691071 |
| 18. | C | 1.925020  | 0.993186  | 3.001115  | 56. | H | 5.821713  | -4.657662 | -2.818769 |
| 19. | C | 1.683554  | -0.187009 | 0.049719  | 57. | H | 6.234623  | -6.027028 | -0.787062 |
| 20. | C | 2.388652  | 0.204126  | -1.129100 | 58. | H | 5.214017  | -5.351457 | 1.374970  |

|     |   |           |           |           |     |   |           |           |           |
|-----|---|-----------|-----------|-----------|-----|---|-----------|-----------|-----------|
| 21. | N | 3.292891  | -0.731273 | -1.449330 | 59. | H | 3.820219  | -3.325635 | 1.513370  |
| 22. | N | 3.186021  | -1.707169 | -0.520965 | 60. | H | 4.289811  | 3.434530  | -3.863376 |
| 23. | C | 2.221839  | -1.411739 | 0.387735  | 61. | H | 2.197285  | 4.775271  | -3.939778 |
| 24. | C | 4.007785  | -2.866928 | -0.587807 | 62. | H | 0.148989  | 3.933076  | -2.789719 |
| 25. | C | 4.576393  | -3.238442 | -1.808126 | 63. | H | 0.230544  | 1.806969  | -1.563130 |
| 26. | C | 5.380277  | -4.372632 | -1.870581 | 64. | H | 4.486461  | 0.336683  | -2.267248 |
| 27. | C | 5.610461  | -5.142765 | -0.731531 | 65. | H | -4.875767 | -2.386740 | 2.801617  |
| 28. | C | 5.035252  | -4.765537 | 0.480689  | 66. | H | -5.345235 | -0.738307 | 2.322466  |
| 29. | C | 4.239931  | -3.626135 | 0.561656  | 67. | H | -7.308098 | -2.280384 | 2.623023  |
| 30. | C | 2.314104  | 1.431399  | -1.938305 | 68. | H | -7.205049 | -1.623463 | 0.970581  |
| 31. | C | 3.452976  | 1.891618  | -2.648821 | 69. | H | -5.935888 | -4.783138 | -0.246670 |
| 32. | C | 3.397031  | 3.102717  | -3.345717 | 70. | H | -6.407778 | -3.148274 | -0.770925 |
| 33. | C | 2.222902  | 3.843295  | -3.385570 | 71. | H | -3.959736 | -3.290585 | -0.699657 |
| 34. | C | 1.078395  | 3.378927  | -2.736224 | 72. | H | -3.992589 | -3.915682 | 0.958270  |
| 35. | C | 1.131978  | 2.184641  | -2.027556 | 73. | C | 1.909384  | 2.460418  | 3.007825  |
| 36. | O | 4.625178  | 1.214092  | -2.682989 | 74. | C | 1.902980  | 3.662362  | 3.004941  |
| 37. | N | -4.508682 | -1.861408 | 0.758048  | 75. | H | 1.895471  | 4.727780  | 3.002904  |
| 38. | C | -5.305338 | -1.778334 | 1.989348  |     |   |           |           |           |

Excited State 3: Singlet-A 3.9740 eV 311.99 nm f=0.3804 <S\*\*2>=0.000

153 -> 155 0.68765

Excited State 9: Singlet-A 4.5008 eV 275.47 nm f=0.1186 <S\*\*2>=0.000

151 -> 155 0.48966

152 -> 156 -0.13650

153 -> 156 0.41363

153 -> 157 0.15238

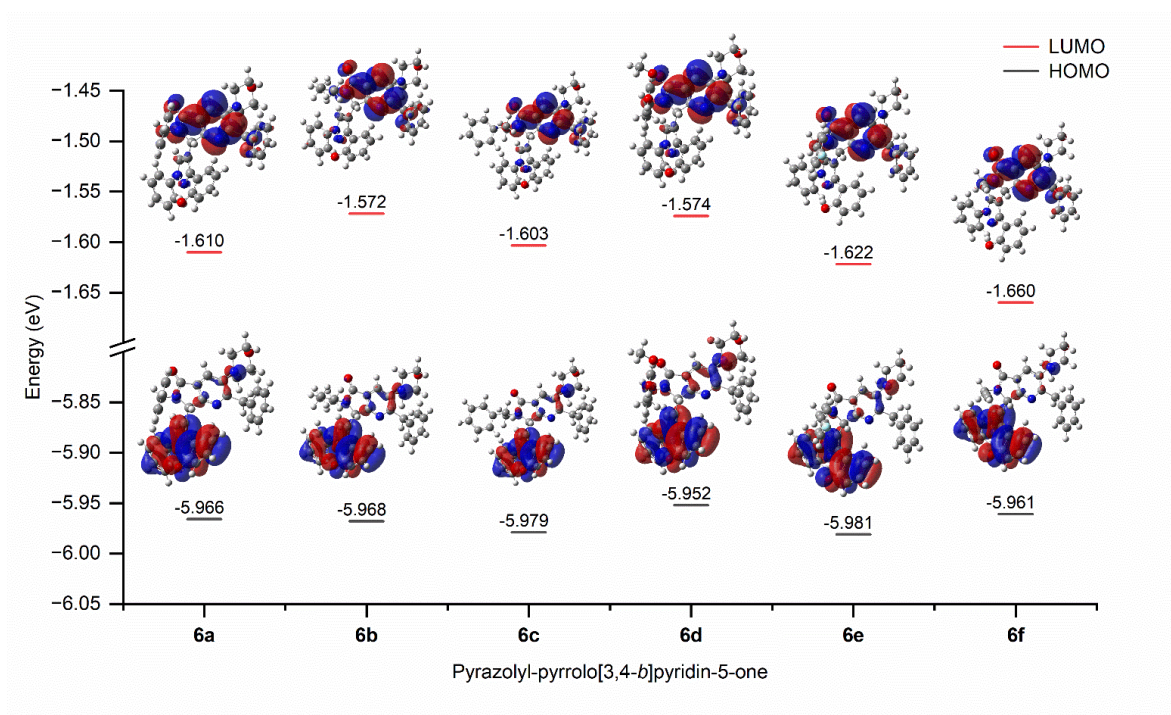

**Figure S51.** Representation of the frontier molecular orbitals (HOMO and LUMO) for compounds **6a-f**.

### Single-crystal X-ray diffraction data

A single crystal X-ray structure of **6e** was collected at 100 K on a Rigaku XtaLAB Synergy-s diffractometer equipped with a HyPix-6000HE detector. The structures were solved using SHELXT,<sup>iv</sup> and refined by full-matrix least squares on  $F^2$  by SHELXL,<sup>v</sup> interfaced through the program OLEX.<sup>vi</sup> All atoms were refined anisotropically and hydrogen atoms were included at geometrically estimated positions. Images were produced using the software Crystal Maker 2.3. X-ray experimental data is given in Table S1 (ESI). CIF data have been deposited with the Cambridge Crystallographic Data Centre, CCDC reference number CCDC 2402623.

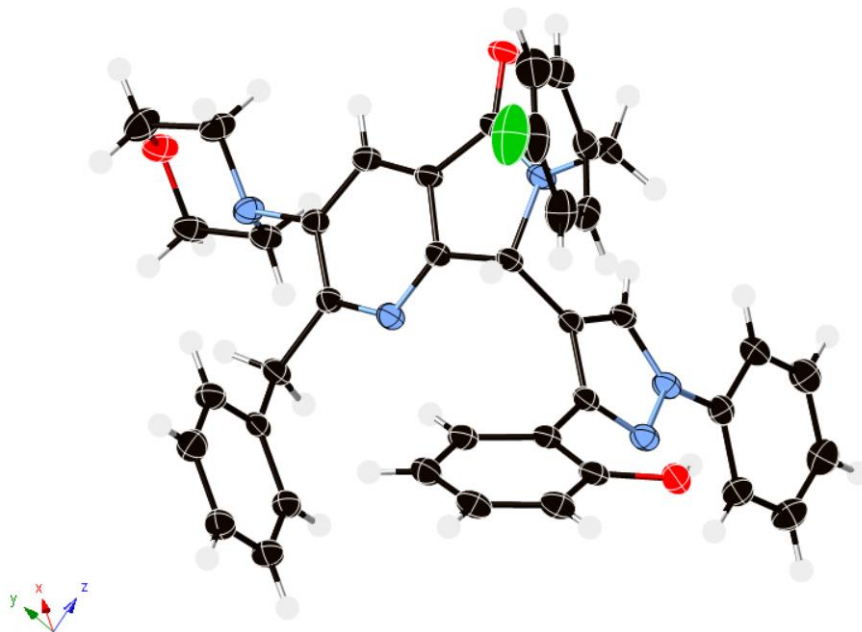

**Figure S52:** Perspective view of the asymmetric unit of **6e** with all non-hydrogen atoms represented with thermal ellipsoids at the 50% probability level (C, black; oxygen, red; nitrogen, blue; fluorine, green; hydrogen, grey). A second perspective view is provided below to clarify those moieties not clearly visible here.

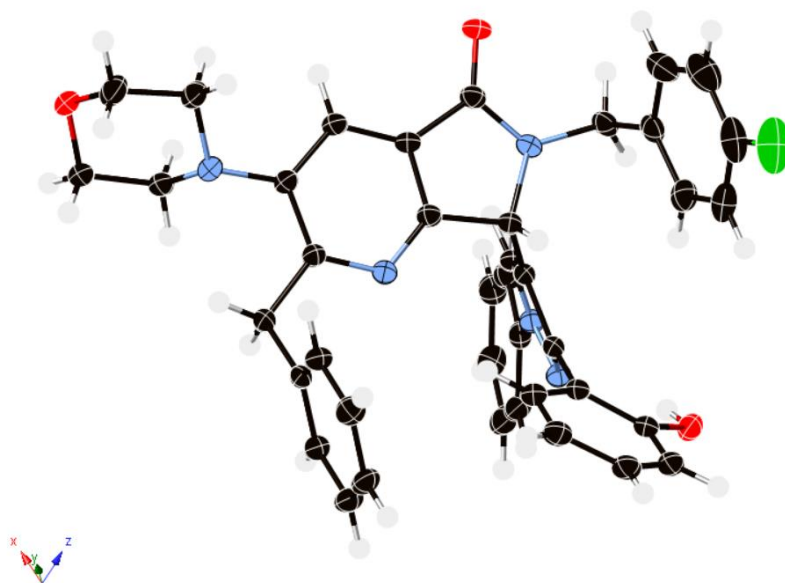

**Figure S53.** Alternative perspective view of the asymmetric unit of **6e** with all non-hydrogen atoms represented with thermal ellipsoids at the 50% probability level (C, black; oxygen, red; nitrogen, blue; fluorine, green; hydrogen, grey).

Table S1 Crystal data and structure refinement for **6e**.

|                                  |                                                                |
|----------------------------------|----------------------------------------------------------------|
| Identification code              | <b>6e</b>                                                      |
| Empirical formula                | C <sub>40</sub> H <sub>34</sub> FN <sub>5</sub> O <sub>3</sub> |
| Formula weight                   | 651.746                                                        |
| Temperature/K                    | 100.00(10)                                                     |
| Crystal system                   | triclinic                                                      |
| Space group                      | P-1                                                            |
| a/Å                              | 12.2204(4)                                                     |
| b/Å                              | 12.5095(4)                                                     |
| c/Å                              | 13.1640(5)                                                     |
| $\alpha$ /°                      | 80.664(3)                                                      |
| $\beta$ /°                       | 66.465(4)                                                      |
| $\gamma$ /°                      | 63.540(4)                                                      |
| Volume/Å <sup>3</sup>            | 1651.41(12)                                                    |
| Z                                | 2                                                              |
| $\rho_{\text{calc}}/\text{cm}^3$ | 1.311                                                          |
| $\mu/\text{mm}^{-1}$             | 0.714                                                          |
| F(000)                           | 686.3                                                          |
| Crystal size/mm <sup>3</sup>     | 0.286 × 0.133 × 0.105                                          |

|                                                |                                                                    |
|------------------------------------------------|--------------------------------------------------------------------|
| Radiation                                      | Cu K $\alpha$ ( $\lambda = 1.54184$ )                              |
| 2 $\theta$ range for data collection/ $^\circ$ | 7.32 to 157.38                                                     |
| Index ranges                                   | $-14 \leq h \leq 15$ , $-15 \leq k \leq 15$ , $-12 \leq l \leq 16$ |
| Reflections collected                          | 28611                                                              |
| Independent reflections                        | 6587 [ $R_{\text{int}} = 0.0414$ , $R_{\text{sigma}} = 0.0285$ ]   |
| Data/restraints/parameters                     | 6587/0/443                                                         |
| Goodness-of-fit on $F^2$                       | 1.028                                                              |
| Final R indexes [ $I \geq 2\sigma(I)$ ]        | $R_1 = 0.0407$ , $wR_2 = 0.1064$                                   |
| Final R indexes [all data]                     | $R_1 = 0.0496$ , $wR_2 = 0.1182$                                   |
| Largest diff. peak/hole / $e \text{ \AA}^{-3}$ | 0.24/-0.23                                                         |
| CCDC Reference Number                          | 2402623                                                            |

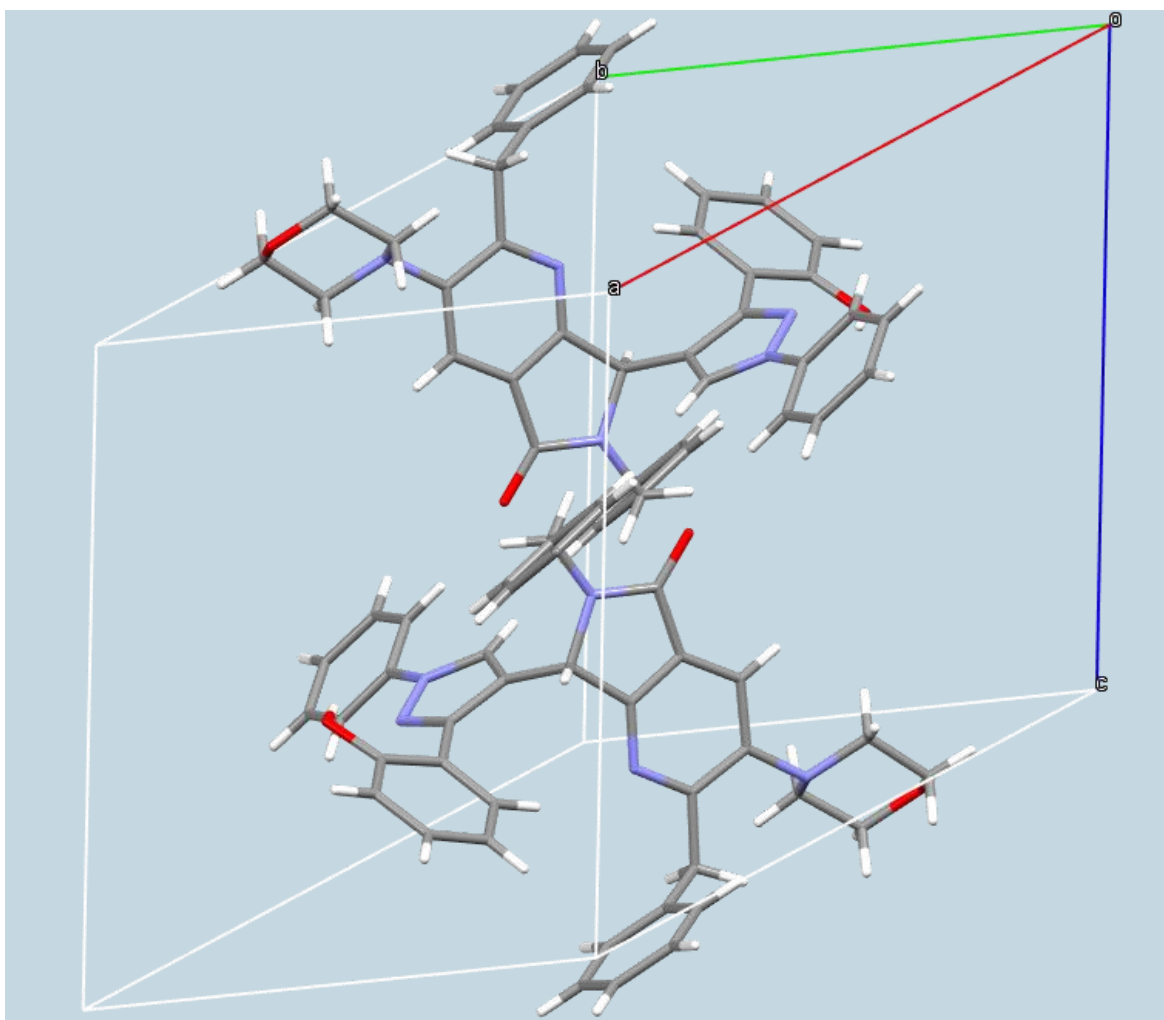

**Figure S54.** Crystal packing in the single crystal of **6e**

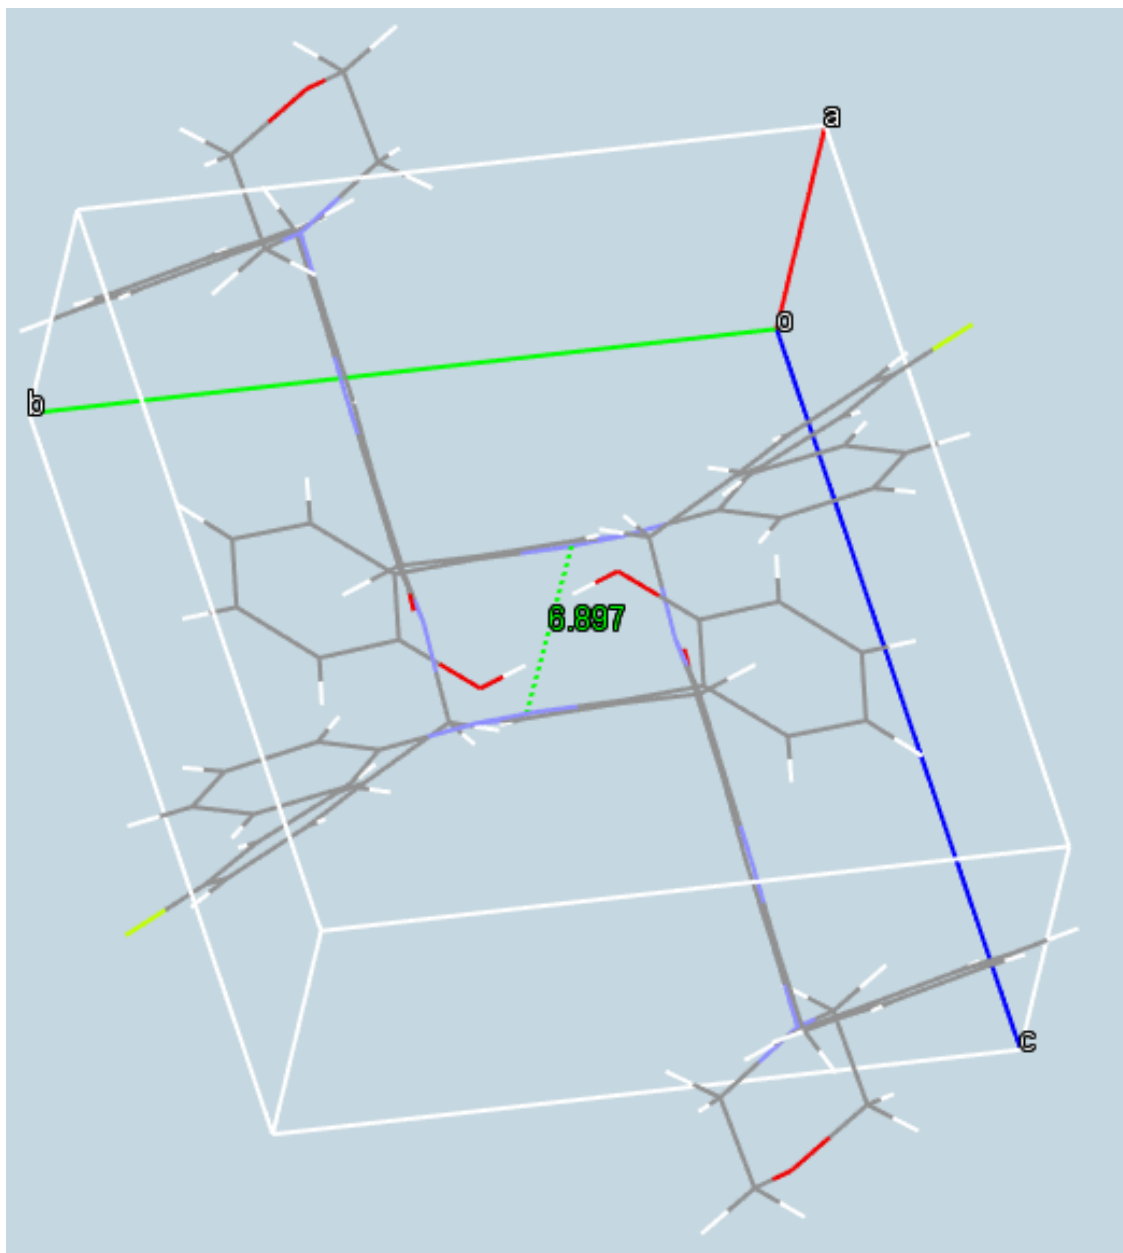

**Figure S55.** Molecular interactions (in Å) involving the pyrazole moiety of compound **6e**.

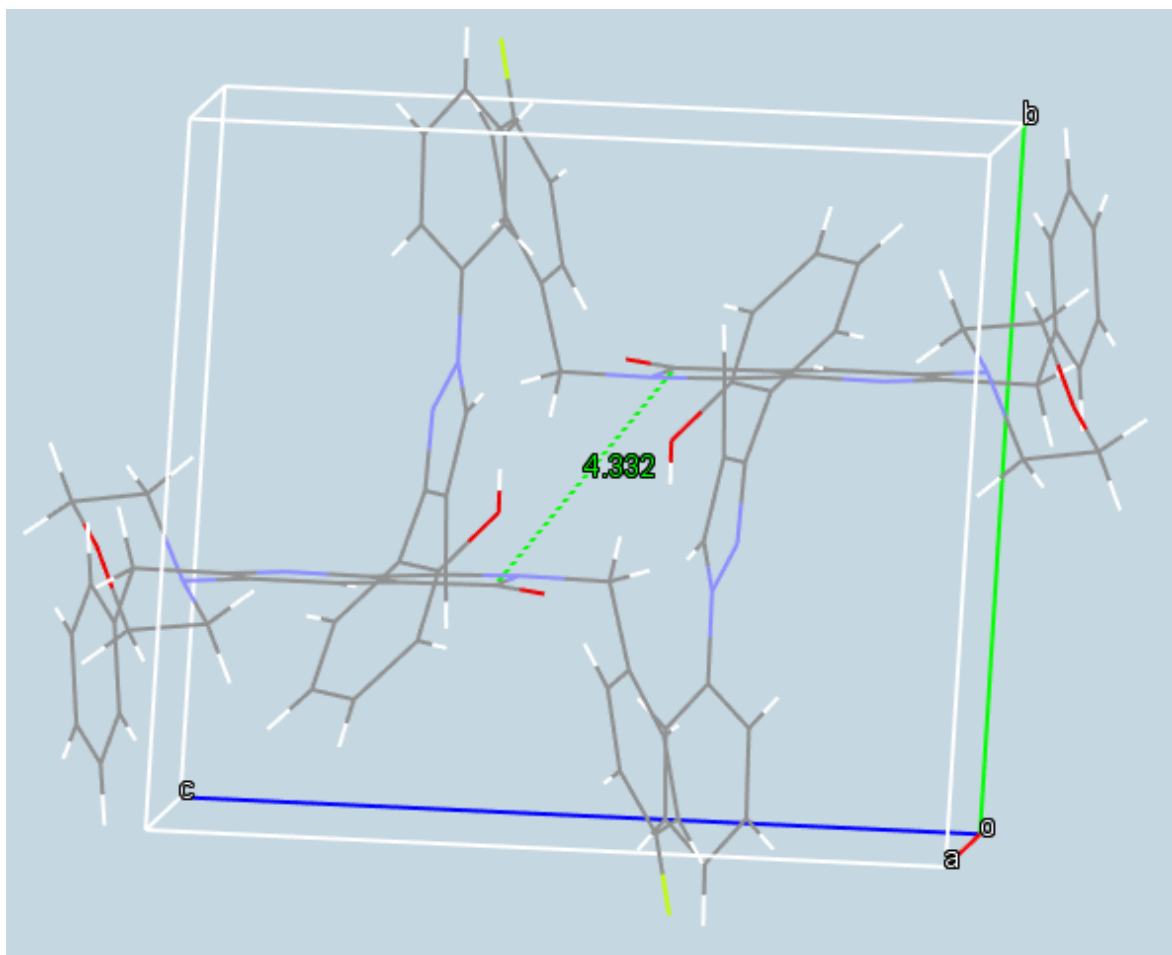

**Figure S56.** Molecular interactions (in Å) involving the pyrrolo[3,4-*b*]pyridin-5-one moiety of compound **6e**.



## References

---

- <sup>i</sup> Ali, I., Haque, A., Saleem, K., & Hsieh, M. F. (2013). Curcumin-I Knoevenagel's condensates and their Schiff's bases as anticancer agents: Synthesis, pharmacological and simulation studies. *Bioorganic & Medicinal Chemistry*, 21(13), 3808–3820. <https://doi.org/10.1016/j.bmc.2013.04.018>
- <sup>ii</sup> DeShong, P., Seganish, W. M. Application of directed orthometalation toward the synthesis of aryl siloxanes. *J. Org. Chem.*, **2004**, 20, 6790–6795. <https://doi.org/10.1021/jo0492057>.
- <sup>iii</sup> Sun, X., Janvier, P., Zhao, G., Bienaymé, H., & Zhu, J. (2001). A Novel Multicomponent Synthesis of Polysubstituted 5-Aminooxazole and Its New Scaffold-Generating Reaction to Pyrrolo[3,4- b ]pyridine. *Organic Letters*, 3(6), 877–880. <https://doi.org/10.1021/ol007055q>
- <sup>iv</sup> Sheldrick, G. SHELXT - Integrated space-group and crystal-structure determination. *Acta Crystallogr. A* **71**, 3-8 (2015). <https://doi.org/doi:10.1107/S2053273314026370>
- <sup>v</sup> Sheldrick, G. M. Crystal structure refinement with SHELXL. *Acta Crystallogr. C* **71**, 3-8 (2015). <https://doi.org/10.1107/S2053229614024218>
- <sup>vi</sup> Dolomanov, O. V., Bourhis, L. J., Gildea, R. J., Howard, J. A. K. & Puschmann, H. OLEX2: a complete structure solution, refinement and analysis program. *J. Appl. Crystallogr.* **42**, 339-341 (2009). <https://doi.org/doi:10.1107/S0021889808042726>
